# Supplementary material for: Genome Mining Shows Ubiquitous Presence and Extensive Diversity of Toxin-Antitoxin Systems in Pseudomonas syringae
Source: Frontiers journal article supplement (doi:10.3389/fmicb.2021.815911), 2022-01-12
Supplement: Image_2.PDF [file Image_2.PDF]

73H-ParE\_1448A  
19H-ParE\_1448A  
11H-ParE\_1448A  
11H-ParE\_DC3000  
38H-ParE\_1448A  
32H-ParE\_B728a  
12H-ParE\_1448A  
12H-ParE\_DC3000  
4H-ParE\_DC3000  
4H-ParE\_1448A  
4H-ParE\_B728a

```

1      10      20      30      40      50      60      70      80      90      100      110      116
MKIIFWTPFAVGRDRRIYDYIE--ADNPSSAALAUDELFEERSGRIVDHEGIGK-PCRIVGTCEL-VAHRN---YILVYDVVD---NAVRLRLVLAHARHWPPS
MPQIEELSEKADSDLEAIEHYAAGLMGHQRADEVSTILE-SIEDIATFTGMGR-PSGAPDVRELALTRYPP--ELVSVVRS---QVVFLVRVLHERNERLNTSKI PDQFS
MCVFWLKTALINLDEEAAYIA--QDNPAATAAFVKAIQSSVTDIASFAMGR-ECRIAGTREWPLPDLP--YILVYRIIRS---GRILVLRIFHTIRQSPVW
MCVFWLKTALINLDEEAAYIA--LENPAATAAFVKAIQI SVKDIASFALGR-ECRIAGTREWPLPDLP--YILVYRIIRS---GRILVLRIFHTIRQSPVW
MLPVWLSPALDDIREIATYIA--WENPSAARRIKSLIQEAEIETMAEHYLYR-SCBAPGTREL-VAHPN---YILVYRVTL---KRIEYVVIHARQYPS
MTTFKLEELPSALIEWEKLGHTIR--VQLKKKLLERLGLPRI PGDAIHGMEDHYKI-LRSG-----YILVYRVIE---DRVYIVYVAVGIRERGNIDYSAKGRLGP
MTYNLEFDARALIEWHKLGDTIR--QQLKKKLLATILVAPRVEANLHALIDCYKIKLRSG-----YILVYQVID---QEVYFVYVAVDGREREEVYRKATDRLGR
MTYSLEFDARALIEWRKLGDTIR--QQLKKKLLATILVAPRVEANLHALIDCYKIKLRSG-----YILVYQVID---QEVYFVYVAVDGREREEVYRKATDRLGR
MNMFAIRRTDVAACGSILEDQVEHIAVYQGFSPAAQRIDTLIDA IQDKLSTLGLYPVSFRLSELGVLHYRELNADGTRIFMEVRIETDDINVMIVLVLGGQSVEQALIRYCLLQPI
MNTFATIRTEVAACGSILEDQVEHIAITQGFSLAAQRINTLIDV IQDKLSTLGLYPVSFRLSELGVLHYRELNADGTRIFMEVMDAGVTVMIVLVLGGQSVEQALIRYCLLQPI
MNTFATIRRTDVAACGSILEDQVEHIAVYQGFSSAAQRIDTLIDA IQDKLSTLGLYPVSFRLSELGVLHYRELNADGTRIFMEVMDAGDINVMIVLVLGGQSVEQALIRYCLLQAI

```

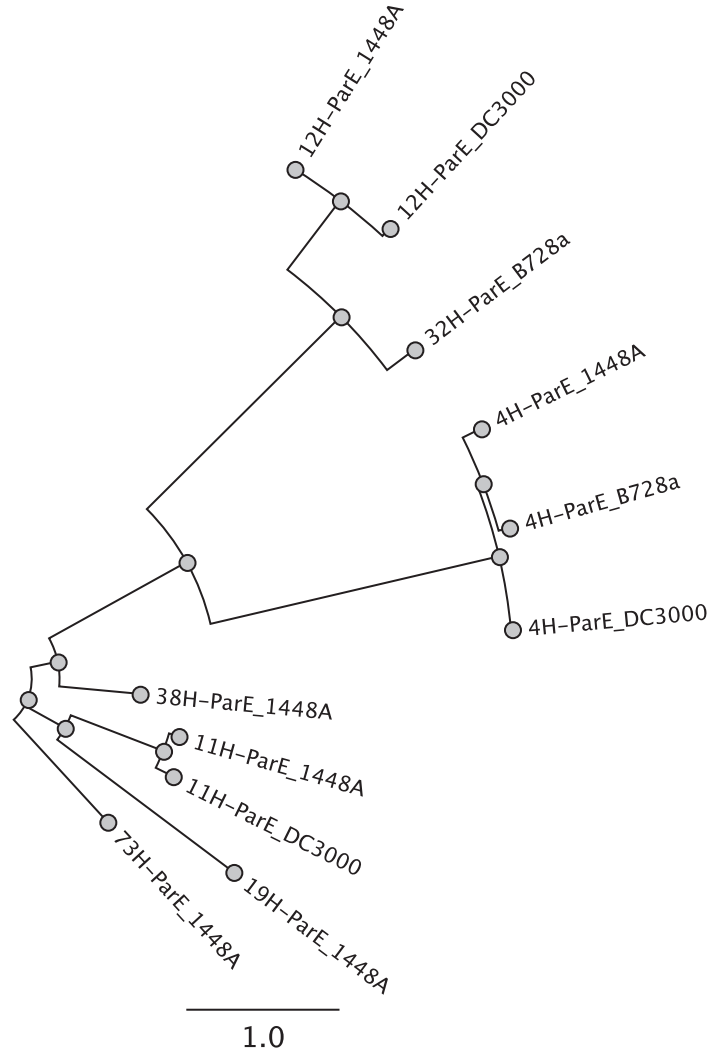

Fig. S2. Alignment (up) and clustering (down) of different parE homologs in the three model strains B728a, 1448A, and DC3000. Orthologs with same hit names were conserved (eg. 4H-parE), but paralogs with different hit names were not conserved (eg. parE of 1448A).
