# Supplementary material for: Genome Mining Shows Ubiquitous Presence and Extensive Diversity of Toxin-Antitoxin Systems in Pseudomonas syringae
Source: Frontiers journal article supplement (doi:10.3389/fmicb.2021.815911), 2022-01-12
Supplement: Image_5.PDF [file Image_5.PDF]

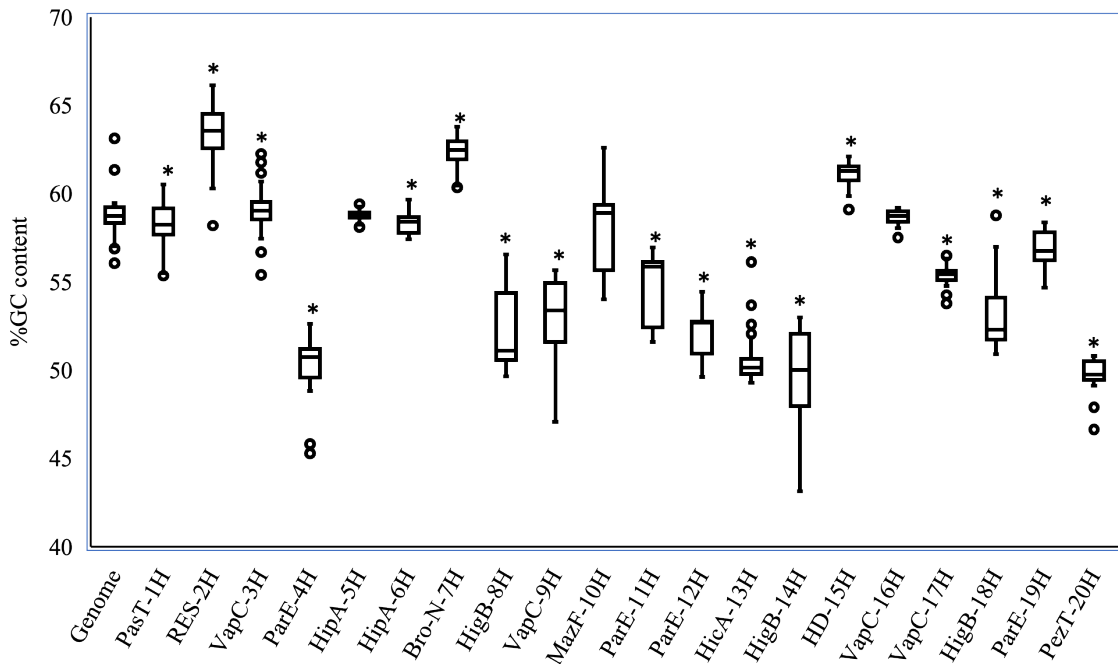

Fig. S5. Variation in GC content of TA systems. GC content of the 339 genomes and the top 20 toxin hits from the strains in which a hit was found are shown. \* indicates significance difference in GC content between the toxin gene and genome based on Steel test at  $P=0.05$ .
