# Supplementary material for: Genome Mining Shows Ubiquitous Presence and Extensive Diversity of Toxin-Antitoxin Systems in Pseudomonas syringae
Source: Frontiers journal article supplement (doi:10.3389/fmicb.2021.815911), 2022-01-12
Supplement: Image_8.PDF [file Image_8.PDF]

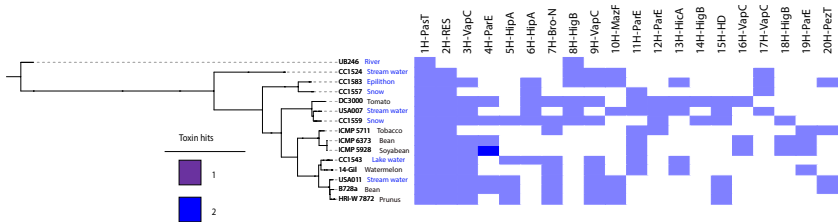

Fig. S8. Heatmap of Top 20 hits of TA toxins by SLING. Isolates from sources other than plant are indicated with blue label in the strain name.
