# Supplementary material for: Genome Mining Shows Ubiquitous Presence and Extensive Diversity of Toxin-Antitoxin Systems in Pseudomonas syringae
Source: Front Microbiol. 2022 Jan 12;12:815911. doi: 10.3389/fmicb.2021.815911 (PMC8790059; doi:10.3389/fmicb.2021.815911)
Supplement: Supplementary Table 1 — Pseudomonas syringae strain genomes used in this study. [file Table_1.XLSX]

## Sheet: Strain_info
Strains	Genus	species	Pathovar	Phylogroup	subclade	Source	Host/environment	Host scientific name	Place	plant_part	NCBI RefSeq Accession
407	Pseudomonas	syringae	tomato	1		Plant	Tomato	Lycopersicum esculentum	CA		NZ_LNKZ01000001.1
445	Pseudomonas	coronafaciens	garcae	4		Plant	Coffee	Coffea arabica	Brazil		NZ_QPCV01000001.1
447	Pseudomonas	coronafaciens	garcae	4		Plant	Coffee	Coffea arabica	Brazil		NZ_QPCX01000001.1
450	Pseudomonas	coronafaciens	garcae	4		Plant	Coffee	Coffea arabica	Brazil		NZ_QPCZ01000001.1
454	Pseudomonas	coronafaciens	garcae	4		Plant	Coffee	Coffea arabica	Brazil		NZ_QPDB01000001.1
461	Pseudomonas	coronafaciens	garcae	4		Plant	Coffee	Coffea arabica	Brazil		NZ_QPDI01000001.1
464	Pseudomonas	coronafaciens	garcae	4		Plant	Coffee	Coffea arabica	Brazil		NZ_QPDL01000001.1
466	Pseudomonas	coronafaciens	garcae	4		Plant	Coffee	Coffea arabica	Brazil		NZ_QPDN01000001.1
475	Pseudomonas	coronafaciens	garcae	4		Plant	Coffee	Coffea arabica	Brazil		NZ_QPDU01000001.1
477	Pseudomonas	coronafaciens	garcae	4		Plant	Coffee	Coffea arabica	Brazil		NZ_QPDW01000001.1
484	Pseudomonas	coronafaciens	garcae	4		Plant	Coffee	Coffea arabica	Brazil		NZ_QPED01000001.1
486	Pseudomonas	coronafaciens	garcae	4		Plant	Coffee	Coffea arabica	Brazil		NZ_QPEF01000001.1
487	Pseudomonas	coronafaciens	garcae	4		Plant	Coffee	Coffea arabica	Brazil		NZ_QPEG01000001.1
489	Pseudomonas	coronafaciens	garcae	4		Plant	Coffee	Coffea arabica	Brazil		NZ_QPEI01000001.1
506	Pseudomonas	savastanoi	phaseolicola	3		Plant	Bean	Phaseolus vulgaris	Canada		NZ_QPAM01000001.1
507	Pseudomonas	savastanoi	phaseolicola	3		Plant	Bean	Phaseolus vulgaris	Canada		NZ_QPAN01000001.1
510	Pseudomonas	savastanoi	phaseolicola	3		Plant	Bean	Phaseolus vulgaris	Canada		NZ_QPAQ01000001.1
513	Pseudomonas	savastanoi	phaseolicola	3		Plant	Bean	Phaseolus vulgaris	Canada		NZ_QPAT01000001.1
527	Pseudomonas	savastanoi	phaseolicola	3		Plant	Bean	Phaseolus vulgaris	Canada		NZ_QPBH01000001.1
529	Pseudomonas	syringae	syringae	2		Plant	Bean	Phaseolus vulgaris	Canada		NZ_QPBJ01000001.1
532	Pseudomonas	savastanoi	phaseolicola	3		Plant	Bean	Phaseolus vulgaris	Canada		NZ_QPBM01000001.1
536	Pseudomonas	syringae	syringae	2		Plant	Bean	Phaseolus vulgaris	Canada		NZ_QPBP01000001.1
548	Pseudomonas	syringae	syringae	2		Plant	Bean	Phaseolus vulgaris	Canada		NZ_QPBZ01000001.1
552	Pseudomonas	syringae	syringae	2		Plant	Bean	Phaseolus vulgaris	Canada		NZ_QPCD01000001.1
642	Pseudomonas	syringae	syringae	2	2c	Plant	Horse chestnut	Aesculus hippocastanum	VA		NZ_ADGB01000296.1
1212	Pseudomonas	syringae	syringae	2	2d	Plant	Pea	Pisum Sativum	UK		NZ_AVCR02000338.1
2339	Pseudomonas	syringae	syringae	2		Plant	Wild Cherry	Prunus avium	Hungary		NZ_LIHU01000001.1
3023	Pseudomonas	syringae	syringae	2	2b	Plant	Lilac	Syringa vulgaris	UK		NZ_MLFD01000001.1
3988	Pseudomonas	amygdali	lachrymans	1	1a	Plant	Cucumber	Cucumis sativus	USA		NZ_LGLJ01000030.1
5270	Pseudomonas	amygdali	morsprunorum	3		Plant	Wild Cherry	Prunus avium	UK		NZ_NBAN01000001.1
5271	Pseudomonas	syringae	avii	1		Plant	Wild Cherry	Prunus avium	UK		NZ_NBAO01000001.1
5275	Pseudomonas	syringae	syringae	2		Plant	Wild Cherry	Prunus avium	UK		NZ_NBAP01000001.1
7969	Pseudomonas	syringae	syringae	2		Plant	Wild Cherry	Prunus avium	UK		NZ_NBAJ01000001.1
19322	Pseudomonas	amygdali	morsprunorum	1	1b	Plant	Prunus	Prunus	FL		NZ_RBNS01000060.1
03-A13	Pseudomonas	syringae		2		Plant	Cantaloup	Cantaloup	FL		NZ_MUJX01000111.1
0788_9	Pseudomonas	syringae	cilantro	5	5	Plant	Cilantro	Coriandrum sativum	US		NZ_LGLN01000053.1
1_6	Pseudomonas	coronafaciens	oryzae	4		Plant	Rice	Oryza sativa		leaf	NZ_CP046035.1
1089_5	Pseudomonas	syringae	apii	1	1a	Plant	Celery	Apium graveolens var. dulce (Mill.) Pers.	US		NZ_RBPL01000073.1
13-139B	Pseudomonas	syringae		2		Plant	Watermelon	Citrullus lanatus	FL	leaf	NZ_MVAT01000013.1
13-429	Pseudomonas	syringae		2		Plant	Watermelon	Citrullus lanatus	FL	leaf	NZ_MVAY01000008.1
13-509A	Pseudomonas	syringae		2		Plant	Squash	Squash	FL	leaf	NZ_MUHP01000142.1
14-410	Pseudomonas	syringae		2		Plant	Watermelon	Citrullus lanatus	FL	leaf	NZ_MUHQ01000165.1
14-Gil	Pseudomonas	syringae		2		Plant	Watermelon	Citrullus lanatus	FL	leaf	NZ_MVAU01000081.1
1448A	Pseudomonas	savastanoi		3	3	Plant	Bean	Phaseolus vulgaris	Ethiopia	leaf	NC_005773.3
1456A	Pseudomonas	syringae		2		Plant	Pea	Pisum sativum	UK	leaf	NZ_QJTW01000100.1
200-1	Pseudomonas	syringae		2	1	Plant	Squash	Squash	GA		NZ_MVAZ01000083.1
2675C	Pseudomonas	syringae		2		Plant	Okra	Abelmoschus esculentus	Kenya		NZ_MLEX01000001.1
2676C	Pseudomonas	syringae		2		Plant	Bean	Phaseolus vulgaris	Lesotho		NZ_MLEY01000001.1
31R1	Pseudomonas	syringae		2		Plant	Corn	Zea mays	USA		NZ_LT629769.1
36_1	Pseudomonas	coronafaciens		4		Plant	Rice	Oryza sativa			NZ_LGKZ01000003.1
7928A	Pseudomonas	syringae		2		Plant	Wild Cherry	Prunus avium	UK		NZ_NBAL01000001.1
7928C	Pseudomonas	syringae		2		Plant	Wild Cherry	Prunus avium	UK		NZ_NBAM01000001.1
7968A	Pseudomonas	amygdali		1		Plant	Wild Cherry	Prunus avium	UK		NZ_NBAI01000001.1
895A	Pseudomonas	syringae		2		Plant	Pea	Pisum sativum			NZ_RBNU01000199.1
90_32	Pseudomonas	syringae		1	1a	Plant	Brassica	Brassica oleracea	CA		NZ_LGLH01000080.1
Alf3	Pseudomonas	syringae		2		Plant	Alfalfa	Alfala	Wy		NZ_KL995075.1
ATCC_10857	Pseudomonas	cichorii		11		Plant		Pseudomonas cichorii			NZ_FNIK01000054.1
AZ84488	Pseudomonas	amygdali		3		Plant	Chinese strawberry	Morella rubra			NZ_LGLA01000055.1
B19001	Pseudomonas	coronafaciens		4		Plant	Oat	Avena sativa	South Korea		NZ_CP046441.1
B48	Pseudomonas	syringae		2	2d	Plant	Peach	Prunus persica	South Carolina		NZ_LGKT01000082.1
B728a	Pseudomonas	syringae		2	2d	Plant	Bean	Phaseolus vulgaris	Wisconsin		NC_007005.1
BRIP38746	Pseudomonas	syringae		1		Plant	Tomato	Solanum lycopersicum	Australia		NZ_SNVG01000001.1
BRIP39023	Pseudomonas	syringae		2	2a	Plant	Barley	Hordeum vulgare	Australia		NZ_KB316288.1
BS0967	Pseudomonas	syringae		5		NA		NA			NZ_PTJG01000001.1
BS2121	Pseudomonas	syringae		2	1	Plant	Squash	Squash	CA		NZ_MVAV01000101.1
BS2900	Pseudomonas	syringae		1		NA		NA			NZ_FNPP01000047.1
C13	Pseudomonas	syringae		1		Plant	Kiwifruit	Actinidia chinensis var. chinensis	China		NZ_MTHM01000001.1
C31	Pseudomonas	syringae		1		Plant	Kiwifruit	Actinidia chinensis var. chinensis	China		NZ_MTHY01000001.1
C66	Pseudomonas	syringae		1		Plant	Kiwifruit	Actinidia chinensis	China		NZ_MTYK01000001.1
C70	Pseudomonas	syringae		1		Plant	Kiwifruit	Actinidia chinensis	China		NZ_MTYN01000001.1
CC1416	Pseudomonas	avellanae		1	1b	Epilithon			USA		NZ_AVEP02000336.1
CC1417	Pseudomonas	syringae		9	9a	Epilithon			USA		NZ_AVEO02000210.1
CC1458	Pseudomonas	syringae		2	2b	Plant	Primula	Primula pauciflora	USA		NZ_AVEN02000364.1
CC1466	Pseudomonas	syringae		10	10b	Plant	Dodecantheon	Dodecantheon pulchellum	USA		NZ_AVEM02000294.1
CC1513	Pseudomonas	tremae		4		Plant	Hutchinsia	Hutchinsia alpina	France		NZ_AVEL02000164.1
CC1524	Pseudomonas	asturiensis		9	9a	Other	Stream water		France		NZ_CP047265.1
CC1543	Pseudomonas	syringae		2	2b	Other	lake water		France		NZ_AVEJ02000441.1
CC1544	Pseudomonas	syringae		1	1b	Other	lake water		France		NZ_AVEI02000376.1
CC1557	Pseudomonas	syringae		10	10b	Other	snow		France		NZ_CP007014.1
CC1559	Pseudomonas	syringae		1	1b	Other	snow		France		NZ_AVEG02000365.1
CC1583	Pseudomonas	syringae		10	10a	Other	Epilithon		France		NZ_AVEF02000308.1
CC1630	Pseudomonas	syringae		1	1a	Other	Sainfoin	Onobrychis	USA		NZ_AVED02000283.1
CC457	Pseudomonas	syringae		2	2d	Plant	cantaloupe	Cucumis melo	France		NZ_AVEB02000356.1
CC94	Pseudomonas	syringae		2		Plant	cantaloupe	Cucumis melo	France		NZ_AVEA02000566.1
CCUG_32775T	Pseudomonas	caricapapayae		6		Plant	Papaya	Carica papaya	Brazil		NZ_VXJY01000001.1
CCUG_51523T	Pseudomonas	cannabina		5		Plant	Cannabis	Cannabis sativa	Hungary		NZ_VXJZ01000001.1
CFBP_1702	Pseudomonas	syringae	viburni	1		Plant	Viburnum	Viburnum sp.	USA		NZ_JYHK01000001.1
CFBP_1754	Pseudomonas	syringae	papulans	2		Plant	Malus	Malus sylvestris	Canada		NZ_JYHI01000182.1
CFBP_2356	Pseudomonas	syringae	dysoxyli	2		Plant	Dysoxylum	Dysoxylum spectabile	New Zealand		NZ_VLHW01000001.1
CFBP_3226	Pseudomonas	amygdali	dendropanacis	3		Plant	Dendropanax	Dendropanax trifidus	Japan		NZ_LIIE01000218.1
CFBP_4217	Pseudomonas	syringae	castaneae	3		Plant	Castanea	Castanea crenata	Japan		NZ_LIIH01000001.1
CFBP_4220	Pseudomonas	syringae	rhaphiolepidis	3		Plant	Rhaphiolepis	Rhaphiolepis umbellata	Japan		NZ_LIHV01000029.1
CFBP_5062	Pseudomonas	savastanoi	fraxini	3		Plant	Fraxinus	Fraxinus excelsior	Netherlands		NZ_LIIC01000080.1
CFBP_5140	Pseudomonas	syringae	broussonetiae	3		Plant	Broussonetia	Broussonetia kazinoki	Japan		NZ_LIII01000149.1
CFBP_6109	Pseudomonas	syringae	cerasicola	3		Plant	Prunus	Prunus yedoensis	Japan		NZ_LIIG01000063.1
CFBP_8692	Pseudomonas	syringae	CFBP	2		Plant	Cucurbita	Cucurbita pepo subsp. pepo	Thailand		NZ_WJSF01000001.1
CFBP2118	Pseudomonas	syringae	syringae	2		NA		NA			NZ_LT962481.1
CFBP3846	Pseudomonas	syringae	avii	1		NA		NA			NZ_LT963402.1
CFBP4215	Pseudomonas	syringae	syringae	2		NA		NA			NZ_LT962480.1
CFBP8161	Pseudomonas	syringae	actinidifoliorum	1		Plant	Kiwifruit	Actinidia deliciosa hayward	France		NZ_LJFL01000001.1
CFBP8180	Pseudomonas	syringae	actinidifoliorum	1		Plant	Kiwifruit	Actinidia deliciosa hayward	France		NZ_LJFN01000001.1
CG001	Pseudomonas	amygdali	eriobotryae	3		Plant	Loquat	Eriobotrya japonica	Japan	leaf	NZ_BMZY01000001.1
Cit7	Pseudomonas	syringae		2	2a	Plant	Citrus	Citrus sinensis			NZ_CP073636.1
CRAFRU12	Pseudomonas	syringae	syringae	2		Plant	Hazelnut	Corylus avellana	Italy	twig	NZ_ATSV01000001.1
CRAFRUed2	Pseudomonas	avellanae		1		Plant	Hazelnut	Corylus avellana	Italy	twig	NZ_AYRI01000001.1
DAPP-PG722	Pseudomonas	savastanoi	savastanoi	3		Plant	Olive	Olea europaea	Italy	Kot	NZ_JOJV01000001.1
DC3000	Pseudomonas	syringae	tomato	1	1a	Plant	Tomato	Lycopersicum esculentum	England		NC_004578.1
E124	Pseudomonas	fuscovaginae		11		Plant	Rice	Oryza sativa	Madagascar	Sheath	NZ_JH605124.1
ES4326	Pseudomonas	syringae		5		Plant	Radish	Raphanus sativus			NZ_CP047260.1
FBF102	Pseudomonas	caspiana		13		Plant	Citrus	Citrus sinensis	Iran	leaf	NZ_LOHF01000001.1
G733	Pseudomonas	syringae		2		Plant	Rice	Oryza sativa			NZ_RBOI01000019.1
H5E3	Pseudomonas	syringae		2		Plant	Pea	Pisum sativum			NZ_RBOF01000072.1
H7608	Pseudomonas	syringae		1		Plant	Mustard	Brassica rapa			NZ_LGLG01000402.1
HC_1	Pseudomonas	amygdali		3		Plant	Sesame	Sesamum indicum			NZ_LGKS01000126.1
HRI-W_5269	Pseudomonas	amygdali		3		Plant	Prunus	Prunus cerasus	United Kingdom		NZ_LIHZ01000001.1
HRI-W_7872	Pseudomonas	syringae		2		Plant	Prunus	Prunus domestica	United Kingdom		NZ_LIHS01000001.1
HS191	Pseudomonas	syringae		2		Plant	Panicum	Panicum miliaceum	Australia		NZ_CP006256.1
ICMP_10052	Pseudomonas	coronafaciens		4		Plant	oat	Avena sativa	USA		NZ_RBPK01000053.1
ICMP_11168	Pseudomonas	syringae		2		Plant	Kiwifruit	Actinidia deliciosa	New Zealand		NZ_LKGV01000001.1
ICMP_11293	Pseudomonas	syringae		2		Plant	Kiwifruit	Actinidia deliciosa	New Zealand		NZ_LKEP01000001.1
ICMP_13052	Pseudomonas	syringae		1		Plant	Delphinium	Delphinium sp.	New Zealand		NZ_RBRA01000107.1
ICMP_13102	Pseudomonas	syringae		2		Plant	Kiwifruit	Actinidia deliciosa	France		NZ_LKEO01000001.1
ICMP_13650	Pseudomonas	syringae		3		Plant	Broussonetia	Broussonetia kazinoki	Japan		NZ_LJPV01000168.1
ICMP_13781	Pseudomonas	savastanoi		3		Plant	Oleander	Nerium oleander	Italy	Stem	NZ_RBTO01000205.1
ICMP_15200	Pseudomonas	syringae		5		Plant	Mustard	Brassica rapa subsp. rapa	USA		NZ_LJPP01000195.1
ICMP_15201	Pseudomonas	cannabina		5		Plant	Mustard	Brassica rapa	USA		NZ_RBPH01000234.1
ICMP_15203	Pseudomonas	cannabina		5		Plant	Cabbage	Brassica oleracea	USA		NZ_RBPJ01000226.1
ICMP_15205	Pseudomonas	syringae	alisalensis	5		Plant	Cabbage	Brassica oleracea	USA		NZ_RBPI01000277.1
ICMP_1657	Pseudomonas	syringae	apii	1		Plant	Apium	Apium graveolens	USA		NZ_RBPC01000226.1
ICMP_16925	Pseudomonas	syringae	solidagae	2		Plant	Solidago	Solidago canadensis var. scabra	Japan		NZ_LJRH01000122.1
ICMP_16928	Pseudomonas	syringae	spinaceae	1		Plant	Spinach	Spinacia oleracea	Japan		NZ_RBTF01000346.1
ICMP_16947	Pseudomonas	savastanoi	retacarpa	3		Plant	Broom brush	Retama sphaerocarpa	Spain		NZ_RBNM01000403.1
ICMP_18417	Pseudomonas	syringae	primulae	1		Plant	Polyanthus	Primula sp.	France		NZ_RBTZ01000333.1
ICMP_18801	Pseudomonas	syringae	actinidiae	1		Plant	Kiwifruit	Actinidia	New Zealand		NZ_AOKQ01000001.1
ICMP_18884	Pseudomonas	syringae	actinidiae	1		Plant	Kiwifruit	Actinidia deliciosa	New Zealand		NZ_CP011972.2
ICMP_19068	Pseudomonas	syringae	actinidiae	1		Plant	Kiwifruit	Actinidia	Japan		NZ_AOJX01000001.1
ICMP_19095	Pseudomonas	syringae	actinidiae	1		Plant	Kiwifruit	Actinidia	Japan		NZ_AOKI01000001.1
ICMP_19103	Pseudomonas	syringae	actinidiae	1		Plant	Kiwifruit	Actinidia	New Zealand		NZ_AOJQ01000001.1
ICMP_19455	Pseudomonas	syringae	actinidiae	1		Plant	Kiwifruit	Actinidia	Chile		NZ_ANJK01000001.1
ICMP_20586	Pseudomonas	syringae	actinidiae	1		Plant	Kiwifruit	Actinidia	New Zealand		NZ_CP017007.1
ICMP_2189	Pseudomonas	savastanoi	glycinea	3		Plant	Soybean	Glycine max	New Zealand		NZ_LJQL01000037.1
ICMP_2400	Pseudomonas	savastanoi	glycinea	3		Plant	Soybean	Glycine max	New Zealand		NZ_RBRU01000029.1
ICMP_2732	Pseudomonas	syringae	primulae	1		Plant	Polyanthus	Primula x polyantha	United Kingdom		NZ_RBPY01000051.1
ICMP_2744	Pseudomonas	syringae	maculicola	1		Plant	Mustard	Brassica nigra	United Kingdom		NZ_RBQA01000276.1
ICMP_2788	Pseudomonas	syringae	pisi	2		Plant	Pea	Pisum sativum	USA		NZ_RBPQ01000102.1
ICMP_2802	Pseudomonas	syringae	aceris	2		Plant	Acer	Acer sp.	USA		NZ_LJPM01000105.1
ICMP_2821	Pseudomonas	cannabina		5		Plant	Cannabis	Cannabis sativa	Yugoslavia		NZ_RBOW01000908.1
ICMP_2823	Pseudomonas	cannabina		5		Plant	Cannabis	Cannabis sativa	Hungary		NZ_LJPX01000642.1
ICMP_2841	Pseudomonas	syringae	tomato	1		Plant	Tomato	Solanum lycopersicum	Denmark		NZ_RBUK01000008.1
ICMP_3263	Pseudomonas	syringae	helianthi	6		Plant	Helianthus	Helianthus annuus	Canada		NZ_RBUT01000084.1
ICMP_3688	Pseudomonas	syringae	syringae	2		Plant	Prunus	Prunus dulcis	New Zealand		NZ_RBRX01000106.1
ICMP_3883	Pseudomonas	syringae	ribicola	1		Plant	Ribes	Ribes aureum			NZ_RBNR01000063.1
ICMP_3947	Pseudomonas	syringae	lapsa	2		Plant	Corn	Zea sp.			NZ_LJQQ01000052.1
ICMP_3962	Pseudomonas	amygdali	ulmi	3		Plant	Ulmus	Ulmus sp.	Yugoslavia		NZ_LJRQ01000258.1
ICMP_3963	Pseudomonas	syringae	viburni	1		Plant	Viburnum	Viburnum sp.	USA		NZ_LJRR01000200.1
ICMP_4048	Pseudomonas	syringae	papulans	2		Plant	Apple	Malus domestica	Canada		NZ_LJRB01000160.1
ICMP_4050	Pseudomonas	syringae	papulans	2		Plant	Apple	Malus domestica	Canada		NZ_RBUS01000337.1
ICMP_4092	Pseudomonas	syringae	tagetis	1		Plant	Marygold	Tagetes erecta	United Kingdom		NZ_RBQC01000077.1
ICMP_4116	Pseudomonas	syringae	berberidis	1		Plant	Barberry	Berberis sp.	New Zealand		NZ_LJPU01000161.1
ICMP_4122	Pseudomonas	syringae		2		Plant	Apricot	Prunus armeniaca	New Zealand		NZ_LKBX01000001.1
ICMP_4181	Pseudomonas	savastanoi	glycinea	3		Plant	Soybean	Glycine max	New Zealand		NZ_RBQY01000031.1
ICMP_4263	Pseudomonas	syringae	tomato	1		Plant	Tomato	Solanum lycopersicum	New Zealand		NZ_RBRJ01000160.1
ICMP_4323	Pseudomonas	coronafaciens	garcae	4		Plant	Coffee	Coffea arabica	Brazil		NZ_LJQK01000045.1
ICMP_4328	Pseudomonas	coronafaciens	atropurpurea	4		Plant	Ryegrass	Lolium multiflorum	Japan		NZ_RBTK01000203.1
ICMP_4329	Pseudomonas	coronafaciens	coronafaciens	4		Plant	oat	Avena sativa	Kenya		NZ_RBSJ01000040.1
ICMP_4330	Pseudomonas	syringae	delphinii	1		Plant	Delphinium	Delphinium sp.	United Kingdom		NZ_RBQG01000117.1
ICMP_4418	Pseudomonas	coronafaciens	striafaciens	4		Plant	Oat	Avena sativa	Zimbabwe		NZ_RBOP01000190.1
ICMP_4460	Pseudomonas	coronafaciens	atropurpurea	4		Plant	Arrhenatherum	Arrhenatherum elatius	United Kingdom		NZ_RBQJ01000114.1
ICMP_4466	Pseudomonas	coronafaciens	garcae	4		Plant	Coffee	Coffea arabica	Brazil		NZ_RBVB01000025.1
ICMP_4959	Pseudomonas	syringae	antirrhini	1		Plant	Antirrhinum	Antirrhinum majus	United Kingdom		NZ_RBQK01000223.1
ICMP_4967	Pseudomonas	syringae		2		Plant	Eriobotrya	Eriobotrya japonica	USA		NZ_RBPU01000106.1
ICMP_4996	Pseudomonas	coronafaciens	striafaciens	2		Plant	Wheat	Triticum aestivum	Mexico		NZ_RBSD01000139.1
ICMP_5011	Pseudomonas	syringae	atrofaciens	2		Plant	Wheat	Triticum aestivum	Zimbabwe		NZ_RBOK01000231.1
ICMP_5014	Pseudomonas	syringae	delphinii	1		Plant	Delphinium	Delphinium elatum	United Kingdom		NZ_RBQH01000160.1
ICMP_5019	Pseudomonas	coronafaciens	garcae	4		Plant	Coffee	Coffea arabica	Kenya		NZ_RBSH01000144.1
ICMP_529	Pseudomonas	syringae	delphinii	1		Plant	Delphinium	Delphinium sp.	New Zealand		NZ_LJQH01000264.1
ICMP_5710	Pseudomonas	amygdali	ciccaronei	3		Plant	Ceratonia	Ceratonia siliqua	Italy		NZ_LJPY01000030.1
ICMP_5711	Pseudomonas	amygdali	mellea	3		Plant	Tobacco	Nicotiana tabacum	Japan		NZ_LJQS01000233.1
ICMP_5928	Pseudomonas	savastanoi	glycinea	3		Plant	Soyabean	Glycine max	Yugoslavia		NZ_RBOQ01000119.1
ICMP_6289	Pseudomonas	meliae		3		Plant	Melia	Melia azedarach	Japan		NZ_LJQT01000414.1
ICMP_6373	Pseudomonas	savastanoi	glycinea	3		Plant	Bean	Phaseolus sp.	USA		NZ_RBPR01000078.1
ICMP_6917	Pseudomonas	cichorii		11		Plant	Carthamus	Carthamus tinctorius	New Zealand		NZ_RBRY01000018.1
ICMP_7840	Pseudomonas	amygdali	photiniae	3		Plant	photinia	Photinia glabra	Japan		NZ_LJQO01000136.1
ICMP_8406	Pseudomonas	syringae		1		Plant	Peach	Prunus persica	New Zealand		NZ_LKBZ01000001.1
ICMP_867	Pseudomonas	syringae	primulae	3		Plant	Soyabean	Glycine max	USA		NZ_RBRQ01000219.1
ICMP_8670	Pseudomonas	savastanoi	glycinea	1		Plant	Primula	Primula x polyantha	New Zealand		NZ_RBPT01000337.1
ICMP_8903	Pseudomonas	syringae	philadelphi	1		Plant	Philadelphus	Philadelphus coronarius	United Kingdom		NZ_LJQY01000106.1
ICMP_8921	Pseudomonas	coronafaciens	zizaniae	4		Plant	Wild rice	Zizania aquatica	USA		NZ_LJRT01000052.1
ICMP_8944	Pseudomonas	coronafaciens	zizaniae	4		Plant	Wild rice	Zizania aquatica	USA		NZ_RBOY01000006.1
ICMP_9091	Pseudomonas	coronafaciens	oryzae	4		Plant	Rice	Oryza sativa	Japan		NZ_RBTA01000048.1
ICMP_9151	Pseudomonas	tremae		4		Plant	Trema	Trema orientale	Japan		NZ_LJRO01000117.1
ICMP_9314	Pseudomonas	amygdali	hibisci	3		Plant	Hibiscus	Hibiscus rosa-sinensis	USA		NZ_RBPD01000097.1
ICMP_9829	Pseudomonas	syringae	coriandricola	1		Plant	Cilantro	Coriandrum sativum	India		NZ_RBTT01000090.1
ICMP_9850	Pseudomonas	syringae	aceris	2		Plant	Trident Mapple	Acer buergerianum	Japan		NZ_RBSM01000105.1
ICMP_9851	Pseudomonas	syringae	aceris	2		Plant	Trident Mapple	Acer buergerianum	Japan		NZ_RBST01000130.1
ICMP_9852	Pseudomonas	syringae	aceris	2		Plant	Hazel	Corylus avellana			NZ_RBSS01000080.1
ISPaVe013	Pseudomonas	syringae	avellanae	2		Plant	Hazel	Corylus avellana			NZ_JH951825.1
ISPaVe037	Pseudomonas	syringae	avellanae	2		Plant	Hazel	Corylus avellana			NZ_JH951862.1
JBC1	Pseudomonas	cichorii	chromosome	11					South Korea		NZ_CP007039.1
KN2.a.3	Pseudomonas	syringae		2							NZ_NHTA01000001.1
KN91	Pseudomonas	syringae	maculicola	3		Plant	Radish	Raphanus sativus			NZ_LGLF01000021.1
Knox652c	Pseudomonas	syringae		2		Plant	Arabidopsis	Arabidopsis thaliana	USA		NZ_NHSY01000001.1
KW41	Pseudomonas	syringae	actinidiae	1		Plant	Kiwifruit	Actinidia			NZ_AGNP01000001.1
LMC.P10	Pseudomonas	syringae		2		Plant	Arabidopsis	Arabidopsis thaliana	USA		NZ_NHTD01000001.1
LMG_2158	Pseudomonas	fuscovaginae		NA							NZ_LT629972.1
LMG_28496	Pseudomonas	coronafaciens	porri	4		Plant	Allium	Allium ampeloprasum	Belgium		NZ_JUEU01000001.1
LP221b	Pseudomonas	syringae		2		Plant	Arabidopsis	Arabidopsis thaliana	USA		NZ_NHSV01000001.1
LP868.1a	Pseudomonas	syringae		2		Plant	Arabidopsis	Arabidopsis thaliana	USA		NZ_NHSU01000001.1
M302091	Pseudomonas	syringae	actinidiae	1							NZ_GL385072.1
M302273	Pseudomonas	syringae	aceris	2							NZ_GL385308.1
M302278	Pseudomonas	amygdali	lachrymans	1							NZ_GL385192.1
MB03	Pseudomonas	syringae	syringae	2	frost damaged plant	Plant	Poplar	Populus lasiocarpa	China		NZ_LAGV01000001.1
NCPPB_2254	Pseudomonas	syringae	persicae	1							NZ_ODAM01000246.1
NCPPB_3739	Pseudomonas	syringae	actinidiae	1		Plant	Kiwifruit	Actinidia deliciosa	Japan		NZ_AFTH01000815.1
NCPPB4273	Pseudomonas	syringae	coryli	2		Plant	Hazel	Corylus avellana	Italy	Hazelnut twig	NZ_AWQP01000001.1
NP29.1a	Pseudomonas	syringae		2		Plant	Arabidopsis	Arabidopsis thaliana	USA		NZ_NHSX01000001.1
NPS3121	Pseudomonas	savastanoi	phaseolicola	3		Plant	Bean	Phaseolus vulgaris			NZ_LGKW01000041.1
NZ-47	Pseudomonas	syringae	actinidiae	1		Plant	Kiwifruit	Actinidia sp	New Zealand		NZ_CP017009.1
NZ43	Pseudomonas	syringae	actinidiae	1		Plant	Kiwifruit	Actinidia chinensis	New Zealand		NZ_MTZE01000001.1
NZ46	Pseudomonas	syringae	actinidiae	1		Plant	Kiwifruit	Actinidia chinensis	New Zealand		NZ_MTZG01000001.1
NZ49	Pseudomonas	syringae	actinidiae	1		Plant	Prunus	Prunus sp.	New Zealand		NZ_MTZJ01000001.1
NZIPFR-IHC1	Pseudomonas	syringae	syringae	2		Plant	Pumpkin	Cucurbita pepo subsp. pepo	Chile		NZ_LKHA01000001.1
p1.C8	Pseudomonas	viridiflava		7							NZ_UTKA01000081.1
p1.H2	Pseudomonas	viridiflava		7							NZ_UTLR01000606.1
P108	Pseudomonas	syringae		2		Plant	Pumpkin	Cucurbita pepo subsp. pepo	Thailand		NZ_VLIA01000001.1
p11.H10	Pseudomonas	viridiflava		7							NZ_UTCQ01000110.1
p11.H12	Pseudomonas	viridiflava		7							NZ_UTCM01000138.1
P113	Pseudomonas	syringae		2							NZ_VLIC01000001.1
p12.A7	Pseudomonas	viridiflava		7							NZ_UTCZ01000051.1
p12.D12	Pseudomonas	viridiflava		7							NZ_UTDX01000066.1
p12.G2	Pseudomonas	viridiflava		7							NZ_UTFA01000065.1
P12854	Pseudomonas	syringae		7		Plant	Pumpkin	Cucurbita pepo subsp. pepo	France		NZ_VLHY01000001.1
P12855	Pseudomonas	syringae		7		Plant	Pumpkin	Cucurbita pepo subsp. pepo	Chile		NZ_VLHZ01000001.1
p13.A3	Pseudomonas	viridiflava		7							NZ_UTFP01000129.1
p13.B4	Pseudomonas	viridiflava		2							NZ_UTGE01000099.1
p13.B5	Pseudomonas	viridiflava		2							NZ_UTGC01000216.1
p13.D7	Pseudomonas	viridiflava		7							NZ_UTGZ01000052.1
p13.E10	Pseudomonas	viridiflava		7							NZ_UTGY01000127.1
p13.E2	Pseudomonas	viridiflava		7							NZ_UTHV01000107.1
p13.E3	Pseudomonas	viridiflava		7							NZ_UTHE01000162.1
p13.E6	Pseudomonas	viridiflava		7							NZ_UTHF01000090.1
p13.F12	Pseudomonas	viridiflava		7							NZ_UTHN01000171.1
p2.A5	Pseudomonas	viridiflava		7							NZ_UUHN01000042.1
p2.C11	Pseudomonas	viridiflava		2							NZ_UUIL01000099.1
p2.F8	Pseudomonas	viridiflava		7							NZ_UUJP01000027.1
p2.G4	Pseudomonas	viridiflava		7							NZ_UUJZ01000061.1
p2.G6	Pseudomonas	viridiflava		1							NZ_UUJX01000077.1
p2.H6	Pseudomonas	viridiflava		1							NZ_UUKJ01000082.1
p20.B3	Pseudomonas	viridiflava		7							NZ_UTMJ01000072.1
p20.B8	Pseudomonas	viridiflava		7							NZ_UTMR01000080.1
p20.D1	Pseudomonas	viridiflava		7							NZ_UTNG01000073.1
p20.F12	Pseudomonas	viridiflava		7							NZ_UTOC01000045.1
p20.G10	Pseudomonas	viridiflava		7							NZ_UTOR01000020.1
p20.H8	Pseudomonas	viridiflava		7							NZ_UTPJ01000073.1
p21.A11	Pseudomonas	viridiflava		7							NZ_UTPE01000042.1
p21.B2	Pseudomonas	viridiflava		7							NZ_UTPR01000051.1
p21.C8	Pseudomonas	viridiflava		7							NZ_UTQL01000037.1
p21.E10	Pseudomonas	viridiflava		7							NZ_UTQX01000047.1
p21.H5	Pseudomonas	viridiflava		7							NZ_UTSM01000042.1
P22	Pseudomonas	viridiflava		2							NZ_UTTC01000051.1
p22.C5	Pseudomonas	syringae		7							NZ_WJPQ01000001.1
p23.C3	Pseudomonas	viridiflava		7							NZ_UTVK01000062.1
p23.D8	Pseudomonas	viridiflava		2							NZ_UTVU01000047.1
p23.E5	Pseudomonas	viridiflava		2							NZ_UTWM01000073.1
p23.F4	Pseudomonas	viridiflava		2							NZ_UTWU01000036.1
p24.B11	Pseudomonas	viridiflava		7							NZ_UTXG01000070.1
p24.B9	Pseudomonas	viridiflava		7							NZ_UTXH01000060.1
p24.C4	Pseudomonas	viridiflava		7							NZ_UTXR01000028.1
p25.A1	Pseudomonas	viridiflava		7							NZ_UUAG01000032.1
p26.B2	Pseudomonas	viridiflava		7							NZ_UUEC01000038.1
p26.C2	Pseudomonas	viridiflava		7							NZ_UUEE01000041.1
p26.D7	Pseudomonas	viridiflava		7							NZ_UUEM01000100.1
p26.E10	Pseudomonas	viridiflava		7							NZ_UUFC01000084.1
p26.G7	Pseudomonas	viridiflava		7							NZ_UUFX01000060.1
p27.A6	Pseudomonas	viridiflava		7							NZ_UUGJ01000074.1
p3.D1	Pseudomonas	viridiflava		7							NZ_UUMB01000054.1
p3.F12	Pseudomonas	viridiflava		7							NZ_UUMM01000019.1
p3.F7	Pseudomonas	viridiflava		7							NZ_UUMZ01000030.1
p3.H1	Pseudomonas	viridiflava		7							NZ_UUNE01000055.1
p3.H5	Pseudomonas	viridiflava		7							NZ_UUNK01000042.1
p4.G1	Pseudomonas	viridiflava		1							NZ_UUPT01000064.1
p5.A5	Pseudomonas	viridiflava		2							NZ_UVTT01000053.1
p5.E1	Pseudomonas	viridiflava		7							NZ_UVVG01000081.1
p5.G2	Pseudomonas	viridiflava		7							NZ_UVVZ01000017.1
p6.B2	Pseudomonas	viridiflava		7							NZ_UVXB01000050.1
p6.D8	Pseudomonas	viridiflava		7							NZ_UVYD01000042.1
p6.G1	Pseudomonas	viridiflava		1							NZ_UVZB01000498.1
p7.E3	Pseudomonas	viridiflava		7							NZ_UWBP01000080.1
p7.H2	Pseudomonas	viridiflava		7							NZ_UWCN01000165.1
p7.H5	Pseudomonas	viridiflava		7							NZ_UWCT01000099.1
P73	Pseudomonas	syringae		2							NZ_WJPS01000001.1
P78	Pseudomonas	syringae		2							NZ_WJPU01000001.1
P79	Pseudomonas	syringae		2							NZ_WJPV01000001.1
p8.E10	Pseudomonas	viridiflava		9							NZ_UWED01000071.1
p8.G1	Pseudomonas	viridiflava		1							NZ_UWFB01000385.1
p8.G4	Pseudomonas	viridiflava		1							NZ_UWFL01000394.1
p8.H6	Pseudomonas	viridiflava		1							NZ_UWFS01000369.1
P87	Pseudomonas	syringae		2							NZ_WJPX01000001.1
P89	Pseudomonas	syringae		2							NZ_WJPY01000001.1
p9.C8	Pseudomonas	viridiflava		9							NZ_UWHC01000069.1
p9.C9	Pseudomonas	viridiflava		9							NZ_UWHG01000048.1
p9.F4	Pseudomonas	viridiflava		9							NZ_UWHZ01000068.1
p9.F7	Pseudomonas	viridiflava		9							NZ_UWIK01000071.1
p9.G6	Pseudomonas	viridiflava		9							NZ_UWIQ01000071.1
PA459	Pseudomonas	syringae	actinidiae	1		Plant	kiwifruit	Actinidia			NZ_AGNQ01000001.1
PD2766	Pseudomonas	syringae	syringae	10		Plant	kiwifruit	Actinidia	USA		NZ_LKEM01000001.1
PD2774	Pseudomonas	syringae	syringae	2		Plant	kiwifruit	Actinidia	USA		NZ_LKEL01000001.1
PP1	Pseudomonas	syringae	pisi	2		Plant	Pea	Pisum sativum	Japan		NZ_CP034078.1
Ps127	Pseudomonas	syringae	syringae	2		Plant	Prunus	Prunus avium	South Africa		NZ_CM008378.1
Ps25	Pseudomonas	syringae		1		Plant	Okra	Solanum lycopersicoides	USA		NZ_CP034558.1
PS711	Pseudomonas	syringae		2		Plant	Squash	Cucurbita sp.	Serbia		NZ_RQXZ01000001.1
Pss9097	Pseudomonas	syringae	syringae	2		Plant	Prunus	Prunus sp.	United Kingdom		NZ_CP026568.1
Pss9654	Pseudomonas	syringae	syringae	2		Plant	Prunus	Prunus domestica	United Kingdom		NZ_MLES01000001.1
psy100	Pseudomonas	syringae	syringae	2		Plant	Bean	Phaseolus lunatus	Kenya		NZ_MLEV01000001.1
PT23	Pseudomonas	syringae	tomato	1		Plant	Tomato	Lycopersicum			NZ_MSDS01000100.1
R10.79	Pseudomonas	syringae		2		Other	Rain sample		Denmark		NZ_NQWX01000010.1
R19326	Pseudomonas	amygdali	morsprunorum	3		Plant	Prunus	Prunus domestica	United Kingdom		NZ_MLEO01000001.1
R25255	Pseudomonas	avellanae		1		Plant	Prunus	Prunus avium	United Kingdom		NZ_MLEC01000001.1
R29095	Pseudomonas	avellanae		1		Plant	Prunus	Prunus avium	United Kingdom		NZ_MLED01000001.1
R2leaf	Pseudomonas	avellanae		1		Plant	Prunus	Prunus avium	United Kingdom		NZ_CP026562.1
R6a	Pseudomonas	syringae	pisi	2		Plant	Pea	Pisum sativum			NZ_RBNT01000302.1
REF	Pseudomonas	cichorii		11		Plant	Coffee	Coffea arabica	Brazil		NZ_QPCI01000001.1
RM.P66	Pseudomonas	syringae		2		Plant	Arabidopsis	Arabidopsis thaliana	USA		NZ_NHST01000001.1
RMX.24.a.1	Pseudomonas	syringae		2		Plant	Arabidopsis	Arabidopsis thaliana	USA		NZ_NHSS01000001.1
S2	Pseudomonas	syringae	actinidiae	1		Plant	Kiwifruit	Actinidia chinensis var. chinensis	China		NZ_SNQS01000001.1
SBV_12848	Pseudomonas	savastanoi		3		Plant	kiwifruit	Actinidia	New Zealand		NZ_QUSH01000001.1
SE-1	Pseudomonas	fuscovaginae		NA		Plant	Rice	Oryza sativa	Philippines		NZ_AQOH01000001.1
Shaanxi_M228	Pseudomonas	syringae	actinidae	1		Plant	Kiwifruot	Actinidia	China		NZ_CP032631.1
T1	Pseudomonas	syringae	tomato	1	1a	Plant	Tomato	Lycopersicon esculentum	Canada		NZ_ABSM01000122.1
TA043	Pseudomonas	viridiflava		7		Plant	Primula	Primula officinalis	France		NZ_AVDV01000001.1
UB246	Pseudomonas	syringae		13	13a	Other	River water		France		NZ_KE695142.1
UB303	Pseudomonas	syringae		2		Other	Lake water		France		NZ_CP047267.1
UMAF0158	Pseudomonas	syringae		2		Plant	Mango	Mangifera indica			NZ_CP005970.1
UMAF0291	Pseudomonas	syringae	syringae	2		Plant	Mango	Mangifera indica	Spain	apical buds	NZ_JACTWA010000001.1
UMAF3028	Pseudomonas	syringae	syringae	2		Plant	Mango	Mangifera indica	Spain	apical buds	NZ_JACTWB010000001.1
USA007	Pseudomonas	syringae		1		Other	Stream water		USA		NZ_AVDY02000369.1
USA011	Pseudomonas	syringae		2		Other	stream water		USA		NZ_CP045799.1
X-1	Pseudomonas	coronafaciens	coronafaciens	4		Plant	Oat	Avena sativa	South Korea	leaves	NZ_CP050260.1
YM7930	Pseudomonas	syringae	maculicola	5		Plant	Radish	Raphanus sativus			NZ_LGLD01000036.1
