# Supplementary material for: Genome Mining Shows Ubiquitous Presence and Extensive Diversity of Toxin-Antitoxin Systems in Pseudomonas syringae
Source: Front Microbiol. 2022 Jan 12;12:815911. doi: 10.3389/fmicb.2021.815911 (PMC8790059; doi:10.3389/fmicb.2021.815911)
Supplement: Supplementary Table 2 — Sequences and other details on toxin antitoxin systems of the three model strains DC3000, B728a, and 1448A. [file Table_2.XLSX]

## Sheet: DC3000
TA system	partner	gene_label	Len(a.a.)	Strand	Delta	Predictor	AA	Nucleotide
PastI (1H)	Ant	PSPTO_4512	145	-	-8	Sling	MAEASIQIEVVYATVQRQVLMTVDVPAGSSVRQALALCGMDREFPELDLSHCPVGIFGKVVADPAARVLEAGERIEIYRPLLADPMEIRRLRAAKAREKRTLPG	ATGGCTGAGGCATCGATTCAGATCGAAGTGGTGTATGCCACGGTTCAGCGTCAGGTGTTGATGACGGTCGATGTGCCGGCAGGCTCGTCGGTACGTCAGGCGCTGGCGCTGTGTGGCATGGATCGGGAGTTTCCCGAGCTGGATCTGTCACACTGCCCTGTGGGTATTTTCGGCAAAGTGGTCGCTGACCCTGCAGCGCGAGTGTTGGAGGCGGGTGAGCGAATCGAGATCTATCGCCCCTTGCTGGCCGACCCGATGGAAATCAGGCGTCTGCGCGCGGCCAAAGCGCGTGAGAAAAGAACGCTGCCAGGCTGA
PastI (1H)	Tx	PSPTO_4513	105	-			MTTHIQRSALLPYPAGFLYDLVNDVARYPEFLPWCSSATVLDASESQMRASLEIAKGGLSQKFMTRNTLVPGESIVMDLVEGPFEQFHGVWTFKPLGEKACKISLDLSFDYAGTIVRATLGPLFNQAANTLVDAFCQRAKELHG	ATGACTACGCACATACAACGCTCTGCTTTACTGCCGTACCCGGCCGGTTTCCTTTATGACCTGGTCAATGACGTGGCTCGTTATCCCGAGTTTCTGCCGTGGTGCTCTTCCGCCACCGTGCTTGACGCCAGCGAGTCGCAAATGCGCGCCAGCCTGGAGATCGCCAAGGGCGGTCTGAGTCAGAAGTTCATGACGCGCAATACGCTGGTCCCCGGCGAATCGATTGTGATGGATCTGGTCGAAGGGCCGTTCGAGCAGTTTCATGGCGTCTGGACGTTCAAGCCGCTGGGTGAAAAGGCCTGCAAGATCAGCCTGGATTTGTCTTTCGATTACGCCGGAACGATTGTACGCGCCACGTTGGGGCCGCTGTTCAATCAGGCGGCCAACACGCTGGTGGAT…
RES-Xre (2H)	Ant	PSPTO_1038	150	-	-4	All	MSLPISDYHPALPRQDDFWQHLGIPARGTRLYTALHSGLPYEVFERLAHYTDLNRSTLAEHLGIAPATLQRRLKVRRFNAEESDRLFRLAAVYKAALDLFEDDTEATRLWLANPVYGLGNRRPLEMLATSAEAQAVLDLIGRLEHGVVA	ATGTCTCTGCCCATCAGCGATTACCATCCCGCCCTGCCCCGGCAGGACGATTTCTGGCAGCACCTCGGTATTCCGGCGCGTGGCACCCGTTTGTACACAGCGCTGCACAGCGGCTTGCCCTATGAAGTGTTCGAGCGCCTGGCGCACTACACCGACCTGAACCGCTCGACGCTGGCTGAACATCTGGGTATCGCCCCGGCGACCTTGCAGCGGCGCCTCAAGGTGCGCCGCTTCAATGCCGAGGAAAGTGACCGTTTGTTTCGTCTGGCAGCCGTCTACAAGGCGGCACTGGACCTGTTTGAAGACGACACCGAAGCCACGCGTCTGTGGCTGGCCAATCCGGTCTATGGGCTGGGCAATCGCAGACCGCTGGAAATGCTCGCCACCTCAGCCGAAGCC…
RES-Xre (2H)	Tx	PSPTO_1037	154	-			MIAVYRLVKRKWLAQAFDGEGAKLYGGRWNSKGNACVYCAGSESLALLEILVHLNNSGVARHYAMLELQIAEAHILNARPDTLPPDWREEPAPQATASFGDAWLASGQSLALAVPSVIIPRESNYLLNVRHPEFQAVVATVKELEFVVDSRLK	GTGATTGCAGTGTATCGCCTGGTCAAACGCAAATGGCTGGCTCAGGCGTTCGACGGCGAAGGCGCAAAGCTCTATGGCGGGCGCTGGAACAGCAAGGGCAATGCCTGCGTGTATTGCGCGGGCAGCGAGTCACTGGCGTTGCTGGAAATACTGGTTCACCTGAACAACAGCGGCGTGGCCCGGCATTACGCCATGCTGGAACTGCAGATAGCCGAAGCACATATCCTCAACGCCCGCCCCGACACCCTGCCCCCCGACTGGCGCGAAGAACCCGCGCCACAAGCCACCGCCTCATTCGGCGACGCCTGGCTGGCCTCCGGTCAAAGCCTGGCGCTGGCCGTGCCCAGCGTGATCATCCCGCGCGAGTCCAACTACCTGCTCAACGTCCGGCACCCGGAA…
VapBC (3H)	Ant	PSPTO_2000	84	-	-1	All	MTTTLSSREFNQDTSGAKKAANEGPVFITDRGRPAHVLLSIEAYLQLTGSAASIADLLIMPTHLDIEFEPQRAVITPRPVDLS	ATGACAACTACCCTCTCAAGCCGCGAATTCAACCAAGACACCAGCGGGGCTAAAAAGGCTGCGAATGAAGGCCCGGTTTTCATTACCGACCGAGGCCGCCCTGCCCATGTGCTGCTGTCGATCGAGGCGTACCTGCAACTGACCGGCAGTGCAGCGAGTATCGCTGACCTGTTAATCATGCCAACGCACCTCGATATCGAATTCGAGCCGCAACGGGCTGTCATCACGCCTCGACCGGTTGACCTGTCCTGA
VapBC (3H)	Tx	PSPTO_1999	151	-			MFLLDTNVVSELRKRNADANVLRWSRTQMASSLFISSITILELETGILRVERRDPTQGAALRMWLDHHVLKAFAGRILPIDTQVAKRCAQLHVPDPRSECDALIAATALVHGMTVVTRNTADFKSSGAALLNPWISQLNEETAYYSSASR	ATGTTCCTGCTCGACACCAACGTGGTGTCCGAACTCAGAAAACGCAATGCCGACGCGAACGTGCTCCGCTGGTCGCGAACCCAGATGGCATCCAGCCTGTTCATCTCGTCCATCACGATTCTTGAGCTCGAAACAGGTATCCTGCGGGTCGAACGCCGTGATCCGACACAAGGCGCAGCCCTGCGAATGTGGCTCGACCACCATGTATTGAAAGCCTTCGCCGGGCGCATTCTGCCAATCGACACCCAGGTCGCAAAACGCTGTGCCCAACTGCACGTGCCCGACCCGCGCAGCGAATGTGATGCCCTGATCGCCGCCACAGCGCTGGTGCACGGCATGACCGTGGTCACCCGCAACACAGCAGATTTCAAATCTAGCGGAGCCGCCTTGCTTAATCCC…
ParDE (4H)	Ant	PSPTO_0240	84	+	12	All	MRVETISYLKRNAADLPLDEPLIVTQNGVPAYVVESYADRKRRDESIALVKLLAISSREYSQGKHCSADELKARLSRRFAHKE	ATGCGAGTTGAAACAATAAGCTATTTGAAACGCAATGCAGCCGATCTGCCTCTCGATGAGCCACTGATTGTCACGCAAAACGGTGTCCCGGCCTACGTGGTGGAGTCTTACGCAGATCGTAAGCGTCGCGATGAGTCCATTGCCTTGGTGAAGCTCTTGGCAATCAGTTCCCGCGAGTACTCCCAAGGCAAGCACTGTTCTGCTGACGAACTTAAAGCCCGATTGAGCAGGAGGTTTGCCCACAAAGAATAA
ParDE (4H)	Tx	PSPTO_0241	117	+			MNMFALRFTDVAQQSLEDQVEHLAVYQGFSPAAQRIDTLIDAIQDKLLSTPLGYPVSPQLSELGVLHYRELNADGYRIFYEVRETDDINVIVIVLVLGGKQSVEQALIRYCLLQPI	ATGAATATGTTTGCACTGCGCTTTACCGATGTTGCCCAGCAAAGCCTCGAAGATCAGGTTGAACACCTGGCGGTCTATCAGGGATTCTCTCCCGCTGCTCAGCGCATAGACACCCTGATTGATGCCATTCAGGACAAGCTCCTGTCCACCCCGTTGGGCTACCCGGTCAGTCCTCAATTGAGTGAGCTGGGCGTACTGCACTATCGTGAGTTGAACGCTGACGGATACCGGATCTTTTACGAGGTGAGGGAGACAGATGATATTAATGTCATCGTCATAGTGCTCGTATTAGGTGGTAAACAAAGTGTTGAACAGGCACTAATCCGCTATTGTCTGCTTCAGCCTATTTAG
HipAB (6H)	Ant	PSPTO_0521	108	+	-1	All	MKAFFPVQCTDTLMRIALLVKQARLQQGVRQIDLAERLGITLRTFRRIEAGSADGVSLRDFMLVVWGLGVSERLFQGLRDDESFSVEQLEAADRKRVRLPRNRPEDF	ATGAAAGCTTTTTTCCCCGTTCAATGCACCGACACGCTGATGCGCATTGCCCTGCTGGTGAAGCAGGCCAGGCTGCAGCAGGGCGTTCGCCAGATCGATCTCGCCGAGAGGCTGGGCATCACGCTTCGCACGTTCCGCCGCATTGAAGCTGGCAGCGCAGACGGCGTATCGCTGCGCGACTTCATGCTGGTGGTCTGGGGCCTGGGTGTGTCAGAGCGCTTGTTTCAGGGGCTGCGAGACGACGAGTCGTTCAGCGTCGAACAGCTTGAAGCTGCCGACCGCAAGCGCGTCCGCTTACCCAGGAACAGGCCGGAGGATTTCTGA
HipAB (6H)	Tx	PSPTO_0522	409	+			MAQAYIYMECPVSGQTLTLGKLTIQSGVGTFQYSPDAVQENIWVPDPFRYPLSARSYSVTKNGGVPGFIDDAMPDGWGERLLHRVEKGPLDSIQLLLKSPNGDRAGNIMAGAARVPQDGLGQTPPKALHARGLDHFIDTCEAIYDSQLTAEQLEILKVRDQRSSAGGARPKRTYLFDKKLILAKPRDKFDHYDLPSVEHACMTFAGLKGLQAANTSLYRSERINTLLVERFDRFFEERTGRFRRLPMLSGLTLLDAEWKARSHPDWQYAALADELYRRGAPDQDRRELYRRMAYNVLVGNADDHPRNHAVIWKDSTWRLSPMYDVLPILDQGPAQVLAMSVGIEGPRLNRGNLLSQHSHFALNKSQAEAVLDEVASWEAELHDYYSQFLAGAELDAAVT…	ATGGCTCAGGCTTATATTTACATGGAGTGCCCTGTCAGCGGGCAGACGCTTACGCTGGGCAAGCTGACGATTCAGTCCGGTGTCGGGACTTTTCAGTATTCACCTGATGCGGTGCAGGAAAACATCTGGGTGCCGGATCCTTTCAGGTATCCGCTGTCTGCGCGCTCTTATTCCGTTACGAAAAATGGCGGCGTTCCCGGTTTTATTGACGACGCCATGCCGGACGGCTGGGGTGAGCGGCTGTTGCATCGGGTTGAGAAAGGCCCGCTGGATTCGATCCAGCTTCTGCTCAAGTCCCCCAACGGCGACAGAGCTGGCAACATCATGGCCGGTGCGGCGCGCGTGCCGCAGGACGGGTTGGGCCAGACGCCTCCCAAGGCCCTGCATGCCAGAGGCCTC…
Bro-xre (7H)	Ant	PSPTO_1651	71	-	37	Sling	MCLVGSVLQAAAVVADHFFGDVFLEAGGCLPSFTAIRTALAASAAVAGSVVGARAVAGVAVDGFLDDGVDD	TTGTGTCTCGTCGGATCAGTTCTTCAGGCGGCGGCGGTAGTCGCTGATCATTTCTTTGGTGACGTCTTCCTTGAAGCAGGTGGGTGCCTCCCCTCCTTCACGGCTATACGCACTGCGCTTGCCGCATCGGCTGCCGTTGCGGGCAGCGTTGTAGGGGCAAGGGCAGTTGCCGGAGTAGCTGTCGATGGATTCCTGGATGATGGCGTTGACGATTGA
Bro-xre (7H)	Tx	PSPTO_1652	192	-			MLSNLFRGSARQAHEVFAGFTPTPFQRHNRQLLALLLENQPWFSARDLGRMIGWPLNERTLRKLDTDQHRMITLDLHGEAEPELMVSESGAYAMMVHHYHAENRGLRQWITNEVVPALRDGQVPFDDCTPNLSMLQWPGLSVSMLHWHSEPWIRLRDMPMLLAHPQMQVDARPHRLAKSWWRAVLPVSRLG	ATGTTAAGCAATCTATTCCGGGGCAGTGCTCGTCAGGCACACGAGGTTTTTGCCGGTTTTACCCCAACCCCCTTCCAACGCCACAACCGCCAGCTCCTCGCCCTCCTCCTCGAAAACCAACCTTGGTTCAGCGCCCGCGATCTGGGTCGCATGATCGGCTGGCCGTTGAACGAGCGGACGCTGCGCAAGCTGGACACAGACCAGCACCGAATGATCACGCTCGACCTGCACGGCGAAGCCGAGCCAGAGCTGATGGTCAGTGAGTCGGGCGCGTACGCGATGATGGTGCATCACTACCACGCGGAGAATCGCGGGTTGCGGCAGTGGATTACCAACGAGGTGGTGCCTGCCTTGCGAGATGGGCAAGTGCCGTTTGATGACTGTACGCCGAACCTGAGC…
HigBA (8H)	Ant	PSPTO_0214	102	+	9	All	MNKNGMRPVHPGEVLKEEYLEPMGLTAAALARALKVSTPTVNDIVLQRRGVSADVALRLAVCLETSPEFWLNLQLAYDLRKAETEKGAQIREQVKCLAHCA	ATGAACAAAAACGGAATGCGCCCCGTCCATCCAGGCGAGGTTCTGAAAGAGGAATATCTTGAGCCGATGGGGCTGACCGCCGCAGCGTTGGCCAGGGCCCTTAAGGTTTCTACGCCGACGGTGAACGACATCGTGCTCCAGCGCAGAGGTGTGAGCGCTGATGTAGCGCTGCGTCTGGCTGTATGCCTGGAGACGAGTCCTGAGTTCTGGCTTAACCTGCAGCTTGCCTACGATCTGCGCAAGGCAGAGACAGAGAAGGGCGCGCAGATTCGTGAGCAGGTCAAATGTCTGGCCCACTGCGCTTGA
HigBA (8H)	Tx	PSPTO_0213	93	+			MIVSFKCVHTRYLFLQGKTRLWPSIKSVAERKLAMLDAATSILDLRSPPGNRLEALDGSRSGQYSVRINAPFRICFVWSINGPEDVEIVDYH	ATGATTGTGAGTTTTAAGTGCGTGCACACGAGATATCTCTTTTTACAAGGCAAGACGCGGCTGTGGCCATCGATTAAATCTGTTGCCGAGCGCAAGCTCGCAATGCTTGATGCTGCTACCTCGATTTTGGATCTGCGCTCTCCTCCCGGCAATCGACTAGAGGCGCTTGATGGAAGTCGTTCTGGCCAATACAGCGTACGTATAAACGCTCCATTCAGGATTTGCTTCGTTTGGAGCATCAACGGTCCCGAGGACGTAGAAATTGTCGATTATCACTGA
VapBC (9H)	Ant	PSPTO_1046	77	-	-1	All	MEQSTVFKSNRSQAVRLPKAVALPDDVKRVDVVAVGRTRIISPAGEMWNSWFDGESVSDDFMAEREQPVEQLRESL	ATGGAACAATCCACAGTCTTCAAAAGCAATCGAAGTCAGGCTGTTCGACTTCCAAAAGCGGTGGCATTGCCCGACGACGTGAAACGGGTAGACGTGGTAGCAGTGGGCAGGACACGCATCATTTCCCCTGCTGGTGAAATGTGGAACAGTTGGTTCGATGGTGAAAGTGTCAGTGATGACTTCATGGCAGAGCGCGAGCAGCCAGTTGAACAACTGCGCGAATCACTCTGA
VapBC (9H)	Tx	PSPTO_1045	135	-			MLKYMLDTNICIFTIKNKPVSVREAFNLHHGQLCISAITLMELVYGAEKSSSPERNLAVVEGFAARLELLPYDSDAAAHTGMIRAELARAGTPIGPYDQMIAGHARSLGLVVITNNQREFQRVEGLRVEDWVSQ	ATGCTCAAATACATGCTCGACACCAATATCTGCATCTTCACTATCAAGAACAAGCCGGTGTCGGTACGTGAGGCCTTCAACCTTCATCACGGGCAGCTGTGTATCAGCGCGATCACGTTGATGGAGCTTGTCTACGGCGCAGAAAAGTCTTCCAGTCCCGAAAGAAATCTTGCTGTTGTAGAAGGTTTTGCAGCGCGTCTTGAATTGCTTCCCTACGATAGCGACGCCGCGGCTCACACCGGCATGATCAGAGCCGAGCTGGCCAGAGCGGGTACACCGATTGGCCCGTACGATCAAATGATTGCAGGACATGCCCGCTCTCTTGGCCTCGTGGTCATCACCAACAACCAGCGTGAATTCCAGCGCGTCGAGGGGCTGAGGGTAGAAGACTGGGTAAGC…
ParDE (11H)	Ant	PSPTO_3676	80	+	-11	All	MSVMSLRLPDEMADTLAHLAKATGRSKSFLALNALREYLTREAWQIAEIQRAIEEADAGEFASEEDVKAVMNKWANNAG	ATGTCCGTTATGTCTCTACGCCTGCCGGACGAGATGGCAGATACCCTTGCACACCTCGCCAAAGCGACCGGCCGCAGCAAGTCGTTTTTGGCCTTGAACGCATTACGTGAATACTTGACTCGCGAAGCCTGGCAGATTGCCGAAATTCAGCGTGCAATTGAAGAAGCAGACGCGGGCGAGTTCGCAAGTGAAGAAGATGTAAAGGCAGTGATGAATAAATGGGCGAACAATGCAGGTTGA
ParDE (11H)	Tx	PSPTO_3677	95	+			MQVEWLKTALKNLDDEAAYISLENPAAAVAFVEALQISVKQLASFPALGREGRIAGTREWPLPDWPYLIPYRIRNGRLQVLRIFHTRRQPPLVW	ATGCAGGTTGAATGGCTAAAAACAGCATTAAAAAACCTGGATGATGAAGCCGCCTACATCTCGCTAGAAAATCCGGCTGCTGCGGTTGCTTTCGTAGAAGCACTACAAATAAGCGTAAAGCAGCTCGCAAGCTTTCCGGCCCTAGGCCGAGAGGGACGAATTGCTGGCACCAGAGAATGGCCTTTGCCAGACTGGCCTTACCTGATTCCATACCGCATCCGTAACGGCCGATTACAGGTTCTGCGGATTTTCCACACGAGAAGGCAGCCGCCGTTGGTGTGGTAA
ParDE (12H)	Ant	PSPTO_5388	80	-	-11	All	MASINVRIDDDLKARAYLELEKLGVTPSELLRQTLQYVAERGQLPFKTVLMTEEDEALLATVRERLAAPQRVKVSLDDL	ATGGCGTCTATTAATGTTCGTATCGACGACGATCTCAAAGCTCGTGCTTATCTCGAGCTTGAAAAGCTTGGCGTCACTCCTTCGGAATTGCTGCGTCAAACCCTGCAGTACGTGGCAGAGCGCGGCCAGCTACCGTTCAAGACCGTACTGATGACCGAGGAAGACGAAGCGTTGCTTGCAACAGTGCGCGAGCGCCTTGCGGCTCCGCAACGGGTCAAGGTTTCACTGGATGACTTATAG
ParDE (12H)	Tx	PSPTO_5387	97	-			MTYSLEFDARALKEWRKLGDTVRQQLKKKLATILVAPRVEANRLHALPDCYKIKLRSSGYRLVYQVIDQEVVVFVVAVDKRERDEVYRKAADRLSG	ATGACTTATAGCCTCGAGTTTGATGCGCGAGCTCTGAAGGAGTGGCGCAAATTAGGGGATACCGTGCGTCAGCAGCTCAAGAAAAAGCTGGCTACGATTCTGGTTGCACCGCGCGTTGAAGCAAATCGTCTGCATGCGTTGCCCGACTGCTACAAAATCAAACTGCGCAGCAGCGGCTATCGGCTGGTTTATCAGGTTATTGACCAAGAGGTTGTGGTCTTCGTGGTTGCTGTGGACAAGCGTGAGCGAGATGAGGTTTACCGTAAGGCGGCTGATCGGTTGAGTGGGTAA
HigBA (14H)	Ant	PSPTO_0422	98	-	9	All	MEMFNPPHPGEILLEEVIPGLQTTITEFASHLGFARETLSRILHGHAPVSPDLAVRLERAGISSARLWLGIQADYDLWQAEHREQPPIEPYVIANPG	ATGGAAATGTTCAATCCTCCCCATCCGGGGGAAATCCTCCTTGAAGAGGTCATTCCCGGCTTGCAGACCACCATCACTGAATTCGCCAGTCACCTGGGTTTTGCAAGAGAAACGCTGTCAAGAATTCTGCATGGGCATGCACCTGTAAGCCCTGATCTGGCGGTAAGGCTCGAGCGAGCGGGTATCAGCAGCGCGCGCCTGTGGCTGGGTATACAGGCGGACTATGATTTGTGGCAAGCGGAGCATCGCGAGCAGCCGCCGATCGAGCCTTATGTCATAGCAAACCCGGGGTAG
HigBA (14H)	Tx	PSPTO_0423	93	-			MIVSWRHKGLKAFFETGSSSGIRADHSKRLAHVLAVLNRARTPANVNMPGWRLHPLKGELEGFWSITINANWRIIFRFFDTDVELVDYLDYH	TTGATCGTCAGCTGGAGACACAAAGGGCTCAAAGCTTTTTTCGAAACCGGCTCTAGCAGCGGCATCAGGGCGGATCACTCAAAACGCCTCGCGCACGTCCTGGCAGTACTGAATCGAGCGAGAACCCCTGCTAACGTCAACATGCCCGGCTGGCGGCTTCATCCCCTGAAAGGTGAACTGGAGGGTTTCTGGTCAATAACTATCAATGCGAACTGGCGGATTATTTTTCGTTTTTTCGATACAGATGTCGAACTGGTCGACTACCTGGATTACCACTGA
HD (15H)	Ant	Un-annotated	53	-	-7	Sling	MLVCRIGRHRQVLDYFFSTRETRLPQSAAKRAEHRKLTIFEVIPALQRMALPC	ATGCTTGTCTGTCGTATCGGCCGGCATCGCCAAGTCCTTGATTATTTTTTTTCGACACGTGAGACCCGCCTCCCACAATCAGCGGCAAAACGTGCAGAGCACAGAAAACTGACTATCTTTGAAGTCATCCCCGCCCTGCAGAGGATGGCTTTGCCATGCTGA	Predictated by 6 frame annotation, lies upstream
HD (15H)	Tx	PSPTO_2479	276	-			MLSIEKLFDDLHSLPSIPKVAQDLMLQFDNPSSNLESIARNIEKDPVIAAKVLRLANSARFRDSRDSSSIEDAAMRLGFNTLRTLVMASAVTGAFKAGPSFDLKGFWLKSFQVAGICRMLAKQTGVDPEIAFTCGVMHNIGELLIQTGAPDVAERLNNAAKAGTPGRAANETLQLGFGYPQVGAELAHRWHLPQVIQQAIAYQAKPLEAPDDAPLPRIVAQAVIISDALETNGGATPDAQKASDGPLMEGIDLNALFAGLPAVLEADKAFSELLS	ATGCTGAGTATCGAAAAGCTTTTTGACGATTTGCACAGTCTCCCGAGTATTCCAAAGGTGGCTCAGGACCTGATGCTGCAGTTTGATAACCCCTCCTCCAACCTCGAAAGCATCGCCCGCAATATCGAGAAAGACCCGGTGATCGCGGCCAAGGTGCTGCGTTTGGCCAACTCGGCAAGGTTTCGCGACTCGCGGGACTCCTCAAGTATCGAAGACGCCGCCATGCGTCTGGGCTTCAACACCTTACGCACCCTGGTCATGGCCTCGGCAGTGACGGGTGCGTTCAAAGCCGGGCCGAGTTTCGATCTCAAGGGGTTCTGGCTGAAAAGCTTTCAGGTTGCCGGGATCTGCCGAATGCTGGCCAAACAGACCGGTGTCGACCCGGAAATTGCCTTCACC…
VapBC (16H)	Ant	PSPTO_B0019	86	-	-4	All	MANVNVRNLPDEVHRAIRIQAALHGRSTEAEIRDILERAARPEGRVKLGSFLASIAREVGGLTDKEHTLFENTRITSPARAVSFE	GTGGCAAACGTGAACGTAAGAAATCTACCCGATGAAGTGCATCGGGCCATCCGCATCCAAGCTGCCCTGCACGGGCGCAGCACCGAGGCCGAAATACGCGACATCTTGGAGCGGGCGGCGAGACCCGAGGGACGTGTGAAACTTGGCTCGTTCTTGGCGTCTATTGCCCGCGAGGTTGGTGGTCTGACCGATAAAGAACACACCTTGTTTGAGAACACGCGCATCACGTCTCCGGCCCGTGCGGTGAGCTTTGAATGA
VapBC (16H)	Tx	PSPTO_B0018	140	-			MILLDTNVISEPQRREPNAHVLDWIDAQALETLYLSTITVAELRAGIALMPVGKRQDSLRENLEKHLLPMFANRVLSFDMTCTKAYAELLAKSRAAGLAVETADAFIAAIALANGFTVATRDTGPFEAAGLNVINPWEA	ATGATCCTGCTCGATACGAACGTAATTTCAGAACCGCAGCGCCGAGAGCCCAATGCCCACGTCCTTGACTGGATCGACGCACAAGCGCTGGAAACGCTTTATCTGTCCACCATCACGGTAGCCGAGTTGCGTGCTGGTATCGCGCTGATGCCTGTCGGAAAACGCCAGGATAGCTTGCGTGAAAACCTGGAAAAGCACCTGCTGCCGATGTTCGCCAATAGGGTGCTGTCGTTCGATATGACTTGTACGAAGGCTTATGCCGAGCTGCTGGCCAAGTCCCGCGCAGCCGGGTTGGCGGTCGAAACGGCAGATGCCTTCATTGCAGCCATCGCCCTCGCCAACGGCTTCACCGTCGCCACCCGTGACACTGGCCCTTTTGAGGCTGCCGGGTTGAACGTC…
VapBC (22H)	Ant	PSPTO_B0072	67	-	-1	All	MRTTVTIDDALYQRALEVADPAMDKADLFREAVQTFVRIQAAKRLMALGATLPTMEDIARRHEKAQ	ATGAGAACGACTGTTACCATCGACGATGCGTTGTACCAACGTGCTCTGGAAGTCGCCGATCCGGCGATGGACAAGGCCGACCTGTTCCGTGAAGCCGTTCAGACGTTTGTGCGCATTCAAGCGGCTAAACGATTGATGGCCTTAGGGGCCACACTGCCAACGATGGAAGACATTGCCCGCCGACACGAGAAGGCACAGTGA
VapBC (22H)	Tx	PSPTO_B0073	125	-			MGVLVDTSVWVEHFRNNSPELVNLLSQDRVLIHPMVIGELACGTPPDRLSTLTDLGDLRGAQQPTVSEVIAFLNTHKLYGLGCGLVDMTLLASALLSGTALWTLDKRLERLASRMAVSYQPPTH	ATAGGCGTCCTGGTAGACACCTCCGTTTGGGTTGAACACTTTCGCAACAACAGTCCAGAACTGGTGAACTTGCTCAGCCAGGACCGGGTACTCATACACCCCATGGTGATCGGAGAACTGGCGTGTGGTACGCCGCCTGATCGTTTGAGCACCTTGACTGACCTTGGCGACCTACGAGGTGCACAACAACCCACGGTGAGTGAAGTCATCGCCTTTCTGAACACCCACAAGCTCTATGGCCTGGGCTGTGGGCTGGTGGATATGACGCTCCTGGCCTCCGCGTTATTGAGCGGCACAGCGCTTTGGACGTTAGACAAGCGCCTGGAGCGTTTGGCTAGCCGCATGGCCGTGTCTTACCAGCCTCCTACTCACTAG
AbiEii (23H)	Ant	PSPTO_3926	53	-		Sling	MQYQIITTGRRLWFKDESAGVFEAFVLSEKTSLDCARAGLLEDIQKNGVVHGR	ATGCAATATCAGATCATCACCACAGGCCGCCGTCTTTGGTTTAAAGATGAGTCTGCGGGAGTCTTCGAGGCGTTTGTGCTCAGCGAAAAAACTTCACTTGACTGCGCAAGGGCAGGTTTGCTCGAAGATATACAGAAAAATGGAGTCGTTCATGGTCGATGA	Sling six frame annotation broke this into two ORFs, N-terminal toxin C antitoxin
AbiEii (23H)	Tx	PSPTO_3926	72	-			MNTHSLLTHLQSRLPDLLAVYLFGSQATGHANSESDLDLAVLVQGTLDPVALWRCGGWRGKSQTSFVCLWT	ATGAACACCCACAGCTTGCTCACACACCTGCAATCCCGATTGCCTGACCTATTGGCTGTCTACCTGTTCGGCAGTCAGGCGACCGGTCATGCCAACTCCGAAAGCGACCTGGATCTTGCCGTGCTTGTGCAAGGCACTCTCGATCCTGTGGCGCTGTGGCGCTGTGGCGGTTGGCGGGGGAAATCGCAGACATCGTTCGTTTGCCTGTGGACCTGA
VapBC (26H)	Ant	PSPTO_1058	80	-	-1	All	MNTTRWNIAVSVDTDQSLRMFLASQGGGRKGDLSRFIEEAVRAHILELSAEQAKASNAHLSEAQLTNTIDEALDWARKP	ATGAATACAACTCGCTGGAACATAGCCGTTTCTGTAGACACTGACCAATCGCTGCGCATGTTTCTGGCCAGCCAAGGCGGTGGTCGCAAAGGCGACCTCTCTCGCTTCATCGAAGAAGCAGTGCGGGCACATATTCTGGAATTGAGCGCTGAGCAGGCAAAAGCTTCCAATGCGCATTTAAGTGAGGCACAGCTGACCAACACGATTGATGAAGCTCTCGACTGGGCACGCAAACCCTGA
VapBC (26H)	Tx	PSPTO_1057	137	-			MRVVLDTNILFSALISPHGAPDTFYRAWRTARFEIVTSQMQLDEIRRASRYPKLQAILQPSKVGTMINNLQRALVLERLTIEEEADDPNDSFLLAMALAGDADYLVTGDRRAGLLQRGHIGRTRIVTSALFCAEAL	ATGCGGGTCGTATTGGATACCAACATCCTGTTCAGCGCCCTGATCTCGCCACATGGTGCACCCGACACCTTTTATCGTGCCTGGCGCACCGCCCGCTTCGAGATAGTGACCTCACAGATGCAGCTGGATGAAATTCGTCGGGCCAGCCGCTACCCCAAGTTGCAGGCTATCCTGCAGCCCTCCAAAGTTGGCACCATGATCAATAACCTGCAGCGAGCTCTAGTGCTAGAGCGCCTGACAATTGAAGAAGAGGCCGATGATCCAAATGATTCATTTTTGCTGGCTATGGCGCTTGCAGGCGATGCGGACTATTTAGTCACTGGCGATCGCCGCGCCGGCCTTTTGCAGCGCGGCCACATTGGGCGTACGCGAATCGTGACGTCTGCACTCTTCTGCGCT…
HigBA (28H)	Ant	PSPTO_B0026	96	+	-1	All	MTESNQAFSSVWDALEDSPAEAENMRIRSSLMSAIRDFIEVRQLSQADAAQLFNVTQPRISELQRGKIDLFSVDRLINMLAQGGMHVEVSVKTAA	ATGACTGAATCAAATCAAGCCTTCAGCAGCGTCTGGGACGCCCTGGAGGACTCACCAGCCGAAGCAGAGAACATGCGTATTCGCAGCAGCCTAATGTCGGCTATCCGAGACTTTATCGAGGTGCGTCAGCTCTCGCAGGCTGACGCTGCGCAGCTGTTCAACGTAACGCAACCCCGCATTTCAGAACTCCAGCGCGGAAAGATCGACCTGTTCAGCGTGGATCGATTGATCAACATGCTAGCCCAGGGCGGCATGCACGTTGAGGTCAGTGTCAAAACTGCAGCTTGA
HigBA (28H)	Tx	PSPTO_B0025	113	+			MNKVLKQIIFMGSALNDLRAFPISARREAGFQLDRVQVGNEPDDWKPMTTVGPGVQEIRIRDAHGAFRVIYIAKFSTAVYVLHCFQKKTQKTSKHDLDLAAKRMKELTKELN	ATGAACAAAGTCCTCAAACAAATCATCTTTATGGGCTCAGCTCTAAACGACCTGAGAGCGTTCCCAATCTCTGCCCGCCGTGAGGCCGGCTTTCAGCTGGATAGGGTGCAGGTGGGCAATGAGCCTGACGATTGGAAGCCCATGACGACCGTTGGTCCAGGGGTACAGGAGATACGGATCAGGGACGCCCACGGCGCCTTCCGTGTGATCTACATTGCGAAATTCTCGACGGCGGTTTATGTCCTGCACTGCTTCCAAAAGAAGACGCAAAAAACGAGCAAGCATGACCTTGACCTCGCCGCCAAGCGGATGAAAGAACTGACTAAGGAGTTGAACTAA
Bro-xre (39H)	Ant	PSPTO_3097	53	+	-8	Sling	MIDEPYTVKNRNADRVLFMEGGRIVANGSPGEILLNPENERTRRFLQLVEQL	ATGAACAAAGTCCTCAAACAAATCATCTTTATGGGCTCAGCTCTAAACGACCTGAGAGCGTTCCCAATCTCTGCCCGCCGTGAGGCCGGCTTTCAGCTGGATAGGGTGCAGGTGGGCAATGAGCCTGACGATTGGAAGCCCATGACGACCGTTGGTCCAGGGGTACAGGAGATACGGATCAGGGACGCCCACGGCGCCTTCCGTGTGATCTACATTGCGAAATTCTCGACGGCGGTTTATGTCCTGCACTGCTTCCAAAAGAAGACGCAAAAAACGAGCAAGCATGACCTTGACCTCGCCGCCAAGCGGATGAAAGAACTGACTAAGGAGTTGAACTAA	Predicted antitoxin extends beyond the PSPTO_3096 annotation, by six frame
Bro-xre (39H)	Tx	PSPTO_3096	182	+			MQNIALRNTHTAYFDATLFLRHSRMLRAIFTDAQAWFCLADLARLMGKALDQRATLKLDADQRREVWLQANGECQRQLMISESGTLALLVHHYVPENRALRQWLTHEVLTVLHDQQNVILDNPRMTQLQWPGTSLSVLHWRSETWIRLRDMPNVVTEAAPRPQPALWRRVLKRMECKRTVD	ATGCAAAATATTGCTCTCAGAAACACCCACACCGCCTATTTCGACGCCACTCTGTTTCTGCGCCACAGTCGCATGCTGCGCGCCATTTTTACTGACGCCCAGGCGTGGTTCTGTCTGGCCGACCTTGCCCGGCTGATGGGCAAGGCGCTGGACCAGCGCGCCACGCTCAAGCTTGATGCGGATCAGCGTCGCGAGGTCTGGTTGCAGGCCAATGGCGAGTGCCAGCGGCAATTGATGATCAGCGAGTCCGGCACGCTGGCGCTGCTGGTTCATCACTACGTGCCGGAGAACCGCGCGCTGCGGCAGTGGCTGACGCATGAGGTGCTGACGGTTTTACACGATCAACAAAACGTGATCCTGGACAACCCCAGAATGACCCAACTGCAATGGCCGGGCACT…
YefM-YoeB	Ant	PSPTO_0337	93	-	-29	TADB	MQVLSFSQARAGLKQAMDDVCRDHEPALITRLRGDHVVMLSLDDYNSMSETMYLLGTEANAKHLRQSIAQHKAGKAFVKEISLDVTGSETEE	ATGCAGGTTTTATCATTCAGCCAGGCTCGCGCCGGTTTAAAGCAAGCGATGGATGATGTGTGCCGGGACCATGAGCCAGCACTCATCACACGCCTGCGCGGTGATCATGTAGTCATGCTTTCCCTTGATGACTACAACTCGATGTCAGAAACCATGTACCTGCTAGGCACAGAGGCCAATGCGAAGCACCTGCGGCAATCCATTGCGCAGCACAAAGCCGGAAAAGCCTTCGTAAAGGAAATTTCACTGGATGTCACAGGGTCAGAAACAGAAGAATAA
YefM-YoeB	Tx	PSPTO_0336	101	-			MSQGQKQKNKQAARTAVGVHFTLSGWDDYTHWKDADQAISLSIDSLISQCLRTPFKGTGKPRPLTGDLTGYWSRRITKEHRLVYFYEGGVLTVIACRHHY	ATGTCACAGGGTCAGAAACAGAAGAATAAACAGGCAGCAAGGACCGCTGTCGGCGTGCATTTCACCCTATCGGGATGGGATGATTACACTCACTGGAAGGATGCCGATCAGGCAATTTCCCTGTCAATAGACAGCCTCATTAGCCAGTGCCTGCGTACGCCGTTCAAAGGCACCGGTAAGCCGAGACCACTGACCGGCGATTTAACCGGGTACTGGTCCCGCCGCATCACCAAAGAGCATCGTCTTGTCTACTTCTATGAGGGCGGTGTACTGACAGTCATCGCGTGTCGCCATCATTACTAG
RelE-like2	Ant	PSPTO_0720	94	+	-11	TADB	MDNEMEQFQKDLLDSVRQMKNGKAARTTEVTLSAAEARAKAGVSQNAFAQLLGVSLRTLQDWEQGRRQPNGAAQTLLRVASQHPEALRDLQGI	ATGACCATGTTGACCTGTGACTGCATGGGCAAGCGTGGCGGCACGCGAGTCATCTACTACAACGCGCTTTCAGAAGGCTATATCTGGCTATTGATTGCTTACACCAACGCGAAATTCGACAATCTGCCGATCGCGTTCCTGAGTCAATTGAAAGATGAGATCAGTCATGGACAATGA
RelE-like2	Tx	PSPTO_0719	59	+			MTMLTCDCMGKRGGTRVIYYNALSEGYIWLLIAYTNAKFDNLPIAFLSQLKDEISHGQ	ATGGACAATGAAATGGAACAGTTTCAGAAGGACTTGCTGGATTCAGTACGCCAAATGAAAAATGGCAAGGCCGCGCGCACTACAGAAGTGACGCTGTCGGCTGCTGAGGCCCGAGCTAAAGCCGGTGTTTCCCAGAATGCGTTTGCTCAACTCTTGGGTGTCAGCTTGCGTACTCTTCAGGATTGGGAACAGGGTCGTCGGCAGCCTAACGGCGCGGCACAGACATTGCTGCGGGTTGCCAGCCAGCATCCTGAGGCGCTTCGCGACCTGCAAGGCATTTAA
Cog2442	Ant	PSPTO_0930	231	+	-4	TADB	MNTTASPSRLLGVGLYTASQASSYTGIPAKDIRRWMFGYSASGVEHPGLWAPEIAFLDDKLLGFHDLLEIRFVHAFRQHGVSLQAIRSASLQAREMFGQRYPFTCRRFQTDGRDIFATVLDETGDEALLDLVKRQYAFKQVITPSLYEGIDYAGEESAKRWYPVKRSKAVVLDPARNFGKPVLTITGIDTAAIYHSYLAEGQSAKRVALLYEIPPAAVEAAVNFEHRIAA	ATGAACACCACCGCATCACCCAGTCGCCTCCTCGGCGTTGGGCTGTACACCGCTTCGCAAGCGTCCTCATACACCGGCATTCCGGCAAAGGACATTCGTAGATGGATGTTTGGCTACAGCGCCTCAGGGGTTGAACATCCAGGCCTCTGGGCTCCGGAAATTGCATTTCTTGACGACAAGCTGCTCGGCTTCCACGACCTGCTGGAAATTCGCTTTGTCCATGCGTTTCGCCAGCATGGCGTCAGCTTGCAAGCGATCCGCAGCGCTTCGTTACAAGCCCGAGAGATGTTCGGCCAGCGCTATCCGTTTACGTGCAGACGCTTTCAAACCGACGGGCGGGATATATTTGCAACCGTTTTGGACGAAACCGGCGACGAGGCGCTGCTGGATCTGGTCAAG…
Cog2442 (PIN10_superfamily PIN_mut7C like)	Tx	PSPTO_0931	136	+			MNFLIDNNLPPAIVRALNELTKCEGHSVVSLRERFPANAADIDWVTHLKKEGGWAVVSQDKFSKGDAERFAFRECGLPIFCLARQWWQMNYWNKAENLVRWWPSITEQALLVKGGAAFRVPWRFSATGKFQQLKI	TTGAATTTTCTGATTGATAACAATCTGCCGCCTGCTATTGTCAGAGCGCTTAACGAGTTGACCAAATGTGAAGGCCATTCTGTAGTCTCGTTGCGCGAAAGGTTTCCTGCAAACGCTGCAGATATTGACTGGGTCACCCACCTCAAAAAAGAAGGCGGGTGGGCAGTCGTCTCACAGGATAAATTCTCCAAGGGAGACGCTGAGCGCTTTGCATTCAGGGAATGCGGCCTCCCGATCTTCTGCCTTGCCAGGCAGTGGTGGCAAATGAACTACTGGAACAAGGCGGAGAATCTGGTCCGGTGGTGGCCATCAATTACCGAGCAGGCTCTGTTGGTAAAAGGCGGCGCAGCGTTTCGTGTGCCGTGGAGATTCTCTGCGACAGGCAAGTTCCAGCAACTC…
HigBA	Ant	PSPTO_5375	122	+	-25	TADB	MPQGEKEMTTHTRSHDESVLDMLREDEAFAIEYLSVALEEIDEDGGEDAFLIAIRRLIEARGGMGNLSKNTGLARPNLYRSIAAGGDPKLSTILKVLQALGVGMSKVVSHRPDVGGQRTDP	ATGCCACAAGGTGAAAAAGAAATGACCACTCATACGCGATCCCATGACGAAAGCGTTCTCGACATGCTTCGTGAAGACGAAGCATTTGCCATCGAATATCTGTCTGTTGCGCTGGAGGAAATCGACGAGGACGGTGGCGAAGACGCTTTTCTTATCGCCATCCGTCGCTTGATCGAGGCGAGAGGCGGTATGGGAAACCTCTCAAAGAACACAGGCCTGGCCCGACCCAACCTTTACAGATCTATTGCAGCTGGTGGCGACCCCAAGCTCTCCACCATCCTGAAGGTGCTCCAGGCACTGGGCGTGGGAATGTCAAAGGTCGTTTCGCACAGGCCGGACGTGGGCGGCCAACGCACCGACCCGTGA
HigBA (ParE_toxin_superfamily)	Tx	PSPTO_5374	108	+			MYEVEHVLSANGVDIYQGWLDTVRDTRSKARITTRVDRAALGHFGITEPVGDGVFEMKLDFGPGFRVYYAIEGQKVLFLLGGGSKDKQQNDIDQAKALWKCHKVKKK	ATGTACGAAGTGGAACACGTACTGTCTGCCAATGGGGTAGATATCTATCAGGGTTGGCTCGACACCGTTCGAGACACCCGATCCAAGGCACGAATCACCACCAGAGTCGACCGAGCGGCGCTTGGCCACTTCGGTATAACCGAACCGGTAGGTGATGGGGTCTTTGAGATGAAGCTGGATTTTGGTCCCGGCTTTCGTGTGTATTACGCGATAGAAGGTCAAAAGGTGCTTTTTCTCTTGGGCGGCGGCTCAAAGGACAAGCAACAAAACGACATCGACCAAGCCAAGGCGCTATGGAAATGCCACAAGGTGAAAAAGAAATGA
GNAT	Ant	PSPTO_2445	133	-	60	Tafinder	MNPPVKIRNPCPPGACDCERERLEAEDADRRILKLTRDAEITLLERLGRVESLEDLQHMQRRIFEQLGVRIEIAPGFNEVRTMRGISIVVEKKTGLCRKTRKLVASAIRSALEARPQIVYQLLNANDLLRDA	ATGAACCCACCCGTCAAAATCCGTAACCCCTGCCCGCCCGGCGCTTGCGACTGCGAGCGCGAACGGCTGGAGGCCGAGGATGCCGACCGGCGCATACTCAAGCTGACCCGTGACGCGGAAATCACGCTGCTCGAACGCCTGGGCCGTGTCGAAAGCCTGGAAGATCTGCAGCACATGCAGCGCAGGATTTTCGAGCAACTGGGCGTGCGCATTGAAATCGCACCGGGCTTCAACGAAGTGCGCACCATGCGCGGCATCAGCATTGTCGTCGAGAAAAAGACCGGGCTGTGCCGCAAGACACGCAAACTGGTCGCAAGCGCAATCCGCAGCGCTCTGGAAGCACGCCCGCAGATCGTCTACCAACTGCTCAACGCCAACGACTTGCTGCGCGACGCGTGA
GNAT	Tx	PSPTO_2444	162	-			MPLEIRPATVADVSQILAFITELAIYERAGHEVKASAEDIQKSLFADNAPASALMCLYDGKPIGYAVYFYSYSTWLGRNGVYLEDLYITPEQRGVGAGRALLRHIAREAVANDCGRLEWSVLDWNEPAIRFYEAIGAEPQSEWVRYRMEGAGLLAFANSGE	GTGCCCCTCGAAATCCGCCCTGCCACTGTCGCTGACGTCAGTCAGATTCTGGCATTCATCACCGAACTTGCGATCTACGAGCGCGCCGGGCATGAAGTCAAGGCCAGTGCCGAAGACATTCAGAAGTCTCTGTTTGCTGACAATGCACCTGCCAGCGCGCTGATGTGCCTGTACGACGGCAAGCCCATTGGCTACGCCGTGTATTTCTACAGCTATTCCACCTGGCTGGGGCGTAACGGGGTGTATCTGGAAGACCTGTACATCACCCCTGAGCAGCGCGGCGTCGGCGCAGGCCGCGCCCTGCTTCGACACATCGCTCGCGAAGCCGTGGCCAACGATTGCGGCCGCCTCGAATGGAGCGTGCTGGACTGGAACGAGCCCGCTATCCGGTTTTACGAA…
pfam11723	Ant	PSPTO_2903	301	+	147	Tafinder	MQYIATQYEINHADLALVLALVRGRTLARAAELLQVDISTVFRSIRRLEASLGAALFEKNRRGYIPTDTAQAMAEQAEHAELALAAARVALQQGEHVISGTVRLTCTDAVLHSLLLPALAEFMPQYPALTLELATSNAFANLSRRDADIALRLTNTPPEHLIGRCLGRAEYVICGRPEFREALEHNPASVPWISPDDSMPDHPSVIWRKQVFPAVIPRYRCSNMSAVAQLVAAGLGVAALTDFTARGLVGVEHLSEPLQGCSTDLWLLTRPDCRALRSVQTLIEALAPLLRAALAAEQAR	ATGCAATATATAGCCACGCAATACGAGATCAACCATGCCGACCTTGCTCTGGTGCTGGCACTGGTTCGCGGCAGAACCCTGGCGCGTGCTGCCGAACTGCTGCAGGTCGATATTTCCACCGTATTTCGCTCCATCCGCCGCCTTGAAGCTTCACTTGGCGCAGCACTGTTCGAAAAGAACCGGCGTGGCTACATCCCCACCGACACCGCCCAGGCAATGGCCGAACAGGCAGAACACGCCGAACTGGCCCTCGCAGCAGCACGGGTTGCCCTGCAACAAGGTGAGCATGTGATCAGCGGCACGGTTCGCCTGACGTGTACCGATGCCGTGCTGCACAGCCTGCTGTTGCCGGCGCTCGCCGAATTCATGCCCCAGTACCCTGCCCTCACCCTGGAGCTG…
pfam11724 (HCAE)	Tx	PSPTO_2904	355	+			MHPKNAWYVACTADEVADKPLGRQICNEKMVFYRDQNQQVVAVEDFCPHRGAPLSLGYVENGQLVCGYHGLVMGGDGKTASMPGQRVRGFPCNKTFAAIERYGFIWVWPGEREKADPALIHHLEWAVSDEWAYGGGLFHIQCDYRLMIDNLMDLTHETYVHASSIGQKEIDEAPPVTTVEGEEVITARHMENIMPPPFWKMALRGNNLADDVPVDRWQICRFTPPSHVLIEVGVAHAGKGGYHAPHEFKASSIVVDFITPETDTSIWYFWGMARNFKPADEQLTATIREGQHKIFSEDLEMLERQQLNLLQHPHRNLLKLNIDAGGVQSRKILERLIAAEQADTADQIPVAAVK	ATGCACCCGAAAAACGCATGGTACGTCGCCTGTACAGCGGATGAAGTCGCCGACAAGCCGCTTGGCCGGCAGATCTGTAACGAGAAGATGGTGTTCTATCGCGACCAGAACCAACAGGTCGTCGCCGTCGAGGACTTCTGCCCGCACCGCGGTGCCCCGCTCTCGTTGGGTTACGTCGAAAACGGCCAACTGGTGTGCGGCTACCACGGGCTGGTAATGGGCGGCGATGGCAAGACGGCCTCCATGCCGGGTCAGCGTGTTCGCGGTTTCCCCTGCAACAAGACCTTCGCAGCGATCGAGCGTTATGGTTTTATCTGGGTCTGGCCGGGCGAACGGGAAAAAGCAGACCCGGCGCTGATCCATCACCTGGAGTGGGCGGTCAGCGACGAATGGGCCTAC…
GNAT	Ant	PSPTO_3387	110	-	-44	Tafinder	MTTLDEKLKPSKTARLEIKTTDFAKEFIRKAATVSGLDMTAFIMASAFEKAEVVMENHRRIELSEKAFSRLHEILNEEDTDATPTPELLKLMRGQHGQREHRSKSRVQD	ATGACCACTTTAGACGAAAAGTTGAAGCCCAGTAAAACTGCACGTTTGGAAATTAAAACTACTGACTTCGCTAAAGAGTTTATTCGTAAAGCAGCAACCGTTTCAGGTCTAGATATGACAGCTTTCATAATGGCTTCAGCGTTCGAAAAAGCTGAAGTCGTGATGGAAAACCACCGAAGAATTGAGCTTTCTGAGAAGGCTTTTTCTAGGTTACATGAAATCCTCAACGAGGAAGATACCGATGCAACCCCAACCCCAGAGCTACTAAAACTAATGAGAGGGCAACATGGACAACGAGAACACCGAAGTAAATCTAGAGTACAAGATTGA
GNAT	Tx	PSPTO_RS17505	191	-			MDNENTEVNLEYKIDSALLVNLDKYRFRKSFDCGLPVISKYYHDNLKRALVSENVSCIGACSESAELIGFCTLTFSELDKARVKTFLPEGNIMPVVKVIKLAMLGVDVEYQGLGIGRALLMTAFQRVFKVHGEIPVKGIFLDAAPNAVGFYNALGFQELDEPDEHGSTPMFLHIKYVKAAVQAAAMGSSK	ATGGACAACGAGAACACCGAAGTAAATCTAGAGTACAAGATTGACAGCGCGCTACTAGTCAATCTTGATAAGTATCGCTTCCGTAAGTCTTTCGACTGCGGGCTTCCCGTTATCAGCAAGTATTACCATGATAACTTGAAGCGTGCGCTCGTCTCTGAAAACGTAAGCTGCATTGGTGCGTGTTCAGAGTCTGCGGAGCTGATAGGTTTCTGCACGCTGACTTTTTCCGAGCTTGACAAAGCTCGTGTGAAAACCTTCCTCCCCGAAGGTAACATAATGCCGGTGGTGAAGGTCATCAAGCTGGCTATGTTGGGAGTCGACGTAGAATATCAGGGTCTTGGCATAGGTCGAGCCCTCTTGATGACGGCGTTCCAGCGCGTGTTTAAGGTGCATGGAGAG…
Pfam12568	Ant	PSPTO_4356	105	+	32	Tafinder	MPIDLDDIIKALAHPVRREILTWLKDPRTTFPAQEHSIEHGVCAGQIDQRAGLSQSTVSAHLATLQRAGLISSKKVGQWHFFRRNEEVIEAFVQALIKELNNPT
Pfam12568 (MFS family)	Tx	PSPTO_4357	389	+			MPLSLLILALSAFAIGTTEFVIMGLLPDVAADLGVSIPGAGWLVTGYALGVAVGAPFMAMATAKLPRKAALVTLMGIFIIGNLLCALASDYNVLMFARVVTALCHGAFFGIGSVVAAGLVPANRRASAVALMFTGLTLANVLGVPLGTALGQYAGWRSTFWAVTVIGVIALIGLIRYLPTNRNEEKLDMRAELAALKGAGIWLSLTMTALFSASMFTLFTYIAPLLGEVTGVSPQGVTWTLLLIGLGLTAGNVIGGKMADRRVSTTLIAVFVSMAVISTALSWTSAALIPTEITLFLWAVAAFAAVPALQINVVTFGKAAPNLVSTLNIGAFNVGNALGAWVGGSVIAHGLGLTSVPLAAAVLAVLALLITLITFRQTGNPDLAPATH
GNAT	Ant	PSPTO_5506	149	+	15	Tafinder	MTDVRIRPVAADDHQAWLPLWQAYLSFYKTELPEGVSEITWQRFLDPSEPTHSALAWLDGKAVGMVNFIYHRSNWSINNACYLQDLIVTPEQRGTGVGRQLIEFVYATARADGCDKVHWLTHETNATAIRLYGRIADRGGYIQFRKAL	ATGACCGACGTCCGGATTCGCCCCGTCGCTGCCGACGATCATCAGGCCTGGCTGCCGTTATGGCAGGCCTATCTGAGTTTTTACAAGACCGAGCTGCCCGAAGGCGTGAGCGAGATCACCTGGCAACGCTTTCTCGACCCCAGCGAGCCGACTCATTCGGCACTGGCCTGGCTGGATGGCAAGGCGGTGGGCATGGTGAACTTCATCTATCATCGCTCCAACTGGAGCATCAACAACGCCTGTTACCTGCAAGACCTGATCGTCACCCCCGAGCAGCGCGGGACGGGCGTAGGCCGGCAGTTGATCGAGTTTGTCTACGCCACGGCCAGGGCCGATGGCTGCGACAAGGTGCACTGGCTGACCCATGAAACCAACGCCACGGCCATCCGGTTGTATGGG…
GNAT	Tx	PSPTO_5507	223	+			MSDIMLDWQAAELPTDKTLAGRFIRLEKLDTSRHGDDLWAVLQGPDADLKLWDYLPYGPFIERVDFDTWLTGHQAASDPWFYTVIDQQTGKAEGVISLMSIFAVHGRIEIGHVTFSAAMQRTPKGTEAVYLLAREAFALGNRRVEWKCNANNARSKRAAERFGFSYEGTFRQHMVVKGLSRDTAWYSMLDSEWPERQKAFEHWLAVDNFADGQQIKGLEAFR	ATGTCGGACATCATGCTGGACTGGCAAGCCGCAGAGCTGCCCACTGATAAAACGCTCGCCGGCCGGTTTATTCGCCTGGAGAAGCTCGATACTTCACGTCACGGCGATGACTTGTGGGCCGTGCTTCAAGGCCCGGATGCCGACCTCAAGTTGTGGGATTATCTGCCTTACGGTCCTTTCATCGAACGCGTTGACTTCGACACATGGCTGACCGGGCATCAGGCGGCCTCCGACCCTTGGTTCTACACCGTGATCGATCAACAGACCGGCAAAGCCGAAGGCGTTATCAGCCTGATGTCGATCTTCGCCGTACATGGCCGAATCGAAATAGGCCACGTCACGTTCAGCGCCGCCATGCAACGCACCCCCAAAGGCACCGAAGCCGTTTACCTGCTGGCC…
RelE-like3	Ant	PSPTO_A0058	67	-	-23	TADB/TAFinder	MSTQLSPIVSEFETQEQADSYDRWFRAKVQEAMNSTKPRLPHDEAMAKVQTALAERRKARANNSLG	ATGAGCACCCAACTTTCCCCCATCGTTTCCGAGTTCGAAACACAGGAACAAGCAGACAGCTATGACCGCTGGTTTCGGGCCAAGGTGCAGGAAGCCATGAACAGCACTAAGCCACGTTTGCCCCACGACGAGGCAATGGCGAAGGTGCAAACCGCCCTAGCAGAGCGAAGGAAGGCCCGTGCTAACAATTCGCTGGGCTGA
RelE-like3 (ParE)	Tx	PSPTO_A0057	92	-			MLTIRWADEASTDLVEIIDYIEQRNPIAAEALNANILKAVEGLPSAPYLFRHGRETGTRECVLHPNYLVVYQVGADTIDVLRILHARQQYP	GTGCTAACAATTCGCTGGGCTGATGAGGCCTCCACCGACTTGGTGGAAATTATCGACTACATCGAGCAGCGTAACCCCATCGCCGCCGAGGCGCTGAACGCCAACATATTGAAGGCCGTTGAAGGCCTTCCATCAGCACCCTACCTGTTCCGCCACGGTCGCGAAACCGGAACGCGTGAATGCGTTTTGCATCCCAACTACCTAGTGGTGTATCAGGTAGGGGCCGACACTATCGACGTGCTGCGCATCCTACACGCCCGTCAGCAATACCCTTGA
Hok-sok	Ant	intergenic				T1TAdb	RNA	gtttcagtttatgaagaattgttaaggaacttttggccgggatgcgtcggAGTGCGCAGCGCGGGTCTCGCGGCGACGTCGGTGGGCGCTGCTTTACGAGCAATACCCGTGCGCGT
Hok-sok	Tx	PSPTO_2768					MFAHEGLGLIFIFIVFLLGAIAMFIHPFHALGSWFRKKKQERKSGQ*	ATGTTTGCACACGAAGGCTTGGGCCTGATCTTCATTTTCATCGTCTTTCTGCTTGGAGCGATCGCGATGTTCATTCACCCCTTCCATGCGCTGGGAAGCTGGTTCAGGAAGAAGAAACAGGAGCGAAAATCCGGGCAGTAG

## Sheet: B728A
TA system	partner	gene_label	Len(a.a.)	Strand	Delta	Predictor	AA	nucleotide
PasTI (1H)	Ant	Psyr_4200	105	-	-8	Sling	MADASIQIEVVYASVQRQVLKTVDVPTGSSVRQALALSGIDKEFPELDLSQCAVGIFGKVVTDPAARVLEAGERIEIYRLLVADPMEIRRLRAARAREKRGLPG	ATGGCTGACGCATCGATTCAGATAGAGGTGGTCTACGCCTCTGTACAGCGCCAGGTATTGAAGACAGTCGATGTACCGACCGGTTCTTCGGTGCGTCAGGCGCTGGCACTCAGCGGCATCGACAAGGAGTTTCCCGAACTGGATCTGAGCCAGTGCGCCGTGGGTATTTTCGGCAAGGTGGTGACTGATCCTGCTGCGCGGGTGCTGGAGGCGGGGGAGCGGATAGAGATTTATCGTCTGCTGGTGGCCGACCCCATGGAGATCAGGCGTCTGCGTGCCGCCAGGGCGCGTGAGAAAAGAGGGCTTCCCGGCTGA
PasTI (1H)	Tx	Psyr_4201	145	-			MTTHIQRSALLPYPAGFLYDLVNDVARYPEFLPWCSSATVVEASEAQMRASLEIAKGGLSQKFMTRNTLVPGESIVMDLVEGPFEQFHGVWTFKPLGEKACKISLDLSFDYAGTIVRATLGPLFNQAANTLVDAFCQRAKELHG	ATGACTACGCATATACAACGCTCTGCTTTACTGCCGTACCCGGCCGGGTTCCTTTATGACCTGGTCAATGATGTGGCTCGTTATCCCGAGTTTCTGCCGTGGTGTTCGTCCGCTACCGTGGTTGAAGCCAGTGAGGCGCAGATGCGCGCCAGCCTGGAGATCGCCAAGGGGGGGCTGAGCCAGAAGTTCATGACGCGCAACACGCTGGTTCCCGGCGAGTCGATCGTGATGGACCTGGTCGAAGGTCCGTTCGAACAGTTCCACGGTGTCTGGACATTCAAGCCGCTGGGCGAGAAAGCCTGCAAGATCAGTCTGGATCTGTCCTTCGATTATGCCGGCACCATCGTTCGCGCCACGCTGGGGCCGCTGTTCAATCAGGCAGCCAACACGCTGGTGGAT…
RES-Xre (2H)	Ant	Psyr_0885	150	-	-4	All	MSLPIRDYHPALPRQDDFWQHLGIPARGARLYSALHDGLPYEVFERLAHYTDLNRSTLAEHLGIAPATLQRRLKVRRFNAEESDRLFRLAAVYKAALDLFENDAEATRLWLANPVYGLGTRRPLEMLATSAEAQAVLDLIGRLEHGVVA	ATGTCTCTGCCCATACGCGACTATCATCCAGCCCTGCCCCGGCAGGACGATTTCTGGCAACACTTGGGCATTCCCGCACGAGGCGCGCGGCTGTACTCGGCGCTGCATGACGGCTTGCCGTATGAAGTCTTCGAACGTCTGGCGCATTACACCGACCTGAACCGCTCGACCCTGGCCGAACATCTGGGCATCGCTCCGGCGACCTTGCAGCGACGTCTCAAGGTGCGCCGCTTCAATGCCGAGGAAAGCGATCGGCTGTTCCGCCTGGCAGCGGTGTACAAGGCGGCGCTGGACCTGTTCGAAAACGACGCCGAAGCGACTCGTCTGTGGCTGGCCAACCCGGTCTACGGGCTGGGTACTCGCAGGCCGCTGGAAATGCTCGCGACCTCGGCGGAGGCT…
RES-Xre (2H)	Tx	Psyr_0884	154	-			MIAVYRLVKRKWLAQAFDGEGAKLYGGRWNSKGNACVYCAGSESLALLEVLVHLNNATVAQHYTMLELQIAEEHVLNARPDTLPRDWREEPAPPATASFGDDWLSSAQSLALAVPSVIIPRESNYLLNVQHPEFRAVVATAKELDFVVDPRLG	GTGATAGCGGTCTATCGACTGGTCAAGCGCAAATGGCTGGCGCAGGCCTTCGACGGCGAAGGCGCCAAGCTCTATGGCGGACGCTGGAACAGCAAAGGCAACGCCTGCGTGTACTGCGCGGGCAGCGAGTCACTGGCCCTGCTGGAAGTGCTGGTACACCTGAACAACGCCACTGTGGCTCAGCATTACACGATGCTTGAACTGCAGATTGCCGAGGAGCACGTCCTCAATGCACGCCCGGACACCCTGCCCCGCGACTGGCGCGAAGAGCCTGCACCACCGGCAACCGCCTCGTTCGGCGACGACTGGCTGTCCTCCGCTCAGAGCCTGGCACTGGCAGTGCCCAGCGTGATCATCCCGCGCGAGTCCAACTACCTGCTCAACGTCCAGCACCCGGAG…
VapBC (3H)	Ant	Psyr_3417	84	+	-1	All	MPTTLSSREFNQDTSGAKKAANEGPVFITDRGRPAHVLLCIEDYLKLTGSAASIADMLIMPTDIDIEFEPQRAVITPRQVDLS	ATGCCCACTACCCTCTCCAGCCGTGAATTCAATCAGGACACCAGCGGGGCCAAGAAGGCGGCTAATGAAGGCCCGGTGTTCATTACCGACCGAGGACGTCCGGCCCATGTGCTGCTTTGCATCGAGGATTACCTGAAGCTGACCGGCAGTGCGGCAAGCATCGCCGACATGCTGATAATGCCCACTGACATCGATATCGAGTTCGAGCCTCAGCGCGCCGTGATCACGCCTCGACAGGTTGATCTGTCCTGA
VapBC (3H)	Tx	Psyr_3418	151	+			MFLLDTNVVSELRKRTADANVLRWSRTQMASSLFISSITILELETGILRIERRDPTQGAILRMWLDQHVLKAFAGRILTVDIQVARRCAQLHVPDPRSECDALIAATALVHGMTVVTRNTMDFQSCGVALLNPWVSQLNEEAAVYSRAAR	ATGTTCCTGCTCGACACCAACGTGGTTTCAGAGCTCAGAAAGCGCACTGCAGACGCCAATGTGCTGCGCTGGTCGCGAACACAAATGGCCTCCAGCCTGTTCATCTCGTCCATCACGATTCTTGAACTCGAAACAGGTATCCTGCGCATCGAACGCCGCGACCCGACACAAGGCGCAATATTGCGAATGTGGCTCGACCAGCATGTATTGAAGGCGTTCGCCGGGCGTATCCTGACCGTCGACATTCAGGTCGCTAGGCGCTGCGCGCAATTGCACGTTCCCGACCCGCGCAGCGAATGCGATGCGTTGATCGCCGCCACTGCGCTGGTGCATGGCATGACCGTGGTCACACGCAACACAATGGACTTTCAGTCGTGCGGGGTCGCGCTGCTCAATCCC…
ParDE (4H)	Ant	Psyr_4645	83	-	12	All	MRVETISFLKRNAADLPLDEPLVVTQNGVPAYVVESYADRKRRDESIALVKLLAISSREYSQGKHCSTDELKARLSRRFTQK	ATGCGAGTTGAAACAATCAGTTTTCTGAAACGCAACGCAGCCGACCTGCCTCTCGATGAGCCATTGGTCGTCACGCAAAATGGTGTCCCGGCCTACGTGGTGGAGTCTTACGCTGATCGTAAGCGCCGCGATGAGTCAATCGCCTTGGTGAAGCTCCTGGCAATCAGCTCCCGCGAGTACTCCCAAGGCAAGCACTGTTCCACTGACGAACTCAAAGCCCGATTGAGCAGGAGGTTTACCCAGAAATAA
ParDE (4H)	Tx	Psyr_4644	117	-			MNTFALRFTDVAQQSLEDQVEHLAVHQGFSSAAQRIDTLIDAIQDKLLSTPLGYPVSHQLSELGVLHYRELNTDGYRIFYEVRDAGDINVIVVALVLGSKQSVEQALIRYCLLQAI	ATGAATACGTTTGCACTGCGCTTTACCGATGTTGCCCAGCAAAGCCTTGAGGATCAGGTTGAACACCTGGCTGTCCATCAGGGATTCTCATCAGCTGCTCAACGTATAGATACCCTTATCGATGCCATCCAAGACAAGCTCCTGTCTACCCCGTTGGGTTACCCGGTCAGTCATCAATTGAGTGAGCTGGGTGTACTGCACTATCGTGAGCTGAACACTGACGGATACCGGATCTTTTACGAGGTGAGGGACGCAGGCGATATAAATGTCATCGTCGTGGCGCTCGTGTTAGGTAGCAAGCAAAGTGTTGAACAGGCCCTCATCCGCTACTGCCTGCTTCAGGCTATATAG
HipAB (5H)	Ant	Psyr_2925	106	-	-8	All	MLDLSFSKPSEIVKRLCERLRTERLALNMTQADLAGRAGIGTNTVSNLEAGRNVGFENVVRVAMALGRTKELEGLFLPKLDSIEDIRRYENSANRLRTKRKSGDA	ATGTTGGATTTAAGCTTCAGCAAGCCTAGTGAGATCGTCAAGCGCCTTTGCGAGCGCCTGCGCACAGAGCGACTGGCGCTGAATATGACACAAGCCGACCTCGCCGGGCGTGCCGGCATCGGCACAAACACGGTCTCCAACCTCGAAGCCGGACGCAATGTCGGATTCGAGAACGTCGTGCGGGTGGCTATGGCTCTTGGCCGAACCAAGGAACTCGAAGGCCTGTTTCTGCCAAAGCTGGACAGCATCGAAGACATTCGACGCTACGAAAACAGCGCCAATCGTCTCCGTACAAAGAGGAAGTCCGGCGATGCTTGA
HipAB (5H)	Tx	Psyr_2924	432	-			MLEQVNVFYEGWGERWQWGTLVSTTALTGRPLIVFEYSNEARQTGLELSSYTLPLEGDRLRRDFPDHQLYLPGPVYDSLPDGWGMLLMDRLFRRRGLTTARIGPLERLAYIGSSAMGAMSFEPVAPEGQESDVHIPLEQLAADVKQVLHGNGGEFLQALLLVGGSPQGARPKALVYRDPETGGFTTAATPGFEAWLIKFPAKEEHAEVCAIEMVYAECLRMCGIETPDTQYLNLPDGLAAFASKRFDRRGGLRIPMQSLAAFTGANYQSPGVLDYVNFLRATQMCTNDVREMARAFERAVFNVAFNNRDDHPKNFAYIMSQDGQWRLSPAYDVTFCEGPSGYHQMDVMGEALEISRAQMLRLAEEAEMSPDAATGVIDGMCDVASRFTAIAENLCPQVI…	ATGCTTGAGCAGGTTAACGTCTTCTACGAGGGCTGGGGTGAGCGATGGCAGTGGGGCACGCTGGTCTCGACGACCGCTTTGACCGGTCGCCCGCTGATCGTGTTCGAATACAGCAATGAAGCCAGACAAACGGGCCTGGAACTGTCCTCCTATACGCTGCCCCTGGAGGGGGACAGGTTGCGTCGAGACTTCCCGGACCATCAGCTGTACTTGCCAGGGCCTGTTTACGACTCGTTGCCGGATGGATGGGGCATGTTGTTGATGGACCGTCTTTTCAGGCGCCGCGGGCTCACCACCGCGCGCATCGGCCCTCTGGAGCGGCTGGCCTATATCGGTAGCAGTGCAATGGGCGCCATGTCGTTTGAGCCCGTGGCGCCCGAAGGGCAGGAATCTGACGTC…
Bro-Xre (7H)	Ant	un-annotated	55	+	8	Sling	MRRCLRNTQRRCSEFTIAPDSNRSNQTGISALLIRSVGFSYARSTLVFNVISAHT	ATGCGCCGGTGCCTAAGAAACACCCAACGTAGATGCAGTGAGTTCACCATAGCCCCAGATTCCAATCGTTCTAATCAAACGGGAATCTCGGCCTTGCTGATCCGCTCAGTTGGGTTTTCTTACGCCCGCTCTACGTTGGTCTTTAACGTCATTTCAGCTCATACGTAG	Predicted by six -frame annotation in SLING
Bro-Xre (7H)	Tx	Psyr_3726	192	+			MLSNLFRASACQARKVCAGFTPTPFHRHNRQLLALLLEDQPWFSARDLGRMIGWPLNERTLRKLDADQHRMITLDLHGEARSELMVSESGAYAMMVHHYHAENRGLRQWITHEVVPALRDGQVPFDDCTPNLSMLQWPGLSVSMLHWHSEPWIRLRDMPRVLTHPQMQVDARPHSLARSWWRAVLPASRLS	ATGTTAAGCAATTTATTTCGGGCAAGCGCTTGTCAGGCGCGCAAGGTGTGTGCCGGTTTCACCCCAACCCCCTTCCACCGCCACAACCGCCAACTCCTCGCCCTCCTCCTCGAAGACCAACCCTGGTTCAGTGCCCGCGATCTGGGTCGCATGATTGGCTGGCCATTGAACGAGCGAACGCTGCGCAAGCTGGACGCTGACCAGCACCGAATGATCACGCTCGACCTGCATGGCGAAGCACGGTCAGAGCTGATGGTCAGTGAGTCGGGGGCGTACGCGATGATGGTGCATCACTATCACGCGGAAAATCGTGGGTTGCGGCAGTGGATTACCCATGAGGTGGTGCCTGCGTTGCGGGATGGGCAGGTGCCGTTCGATGACTGCACGCCGAACCTGAGC…
VapBC (9H)	Ant	Psyr_0895	77	-	-1	All	MEQSTVFKSNRSQAVRLPKAVALPDDVKRVDVIAVGRTRIISPAGEMWNSWFDGESVSDDFMAERGQPAEQQRESL	ATGGAACAATCCACAGTCTTCAAAAGCAATCGAAGCCAGGCTGTCCGACTGCCAAAAGCGGTGGCCTTGCCCGACGACGTGAAACGTGTCGATGTTATAGCCGTGGGCAGAACCCGCATTATTTCCCCCGCCGGTGAAATGTGGAACAGCTGGTTCGATGGTGAAAGTGTCAGTGATGATTTCATGGCAGAGCGCGGACAACCAGCCGAACAGCAGCGCGAATCGCTCTGA
VapBC (9H)	Tx	Psyr_0894	135	-			MLKYMLDTNICIFTIKNKPASVREACNLHHGQLRISAITLMELVYGAEKSLSPERNLAVVEGFTARLEVLPYDSDAAAHTGMIRAELARAGTPIGPYDQMIAGHARSLGLVVITNNQREFQRVEGLRVEDWVSQ	ATGCTCAAGTACATGCTTGACACCAACATTTGCATTTTTACTATAAAGAACAAGCCAGCTTCGGTGCGTGAAGCCTGCAACCTCCATCACGGACAGCTACGTATCAGCGCGATCACATTGATGGAGCTTGTATACGGCGCAGAAAAGTCTTTGAGCCCCGAAAGGAATCTTGCCGTTGTTGAGGGTTTCACGGCGCGTCTTGAAGTGCTCCCTTACGACAGCGACGCGGCGGCTCATACCGGCATGATCAGAGCCGAACTGGCCAGAGCGGGCACGCCGATCGGCCCGTACGATCAAATGATTGCAGGACACGCCCGCTCTCTAGGCTTGGTTGTCATCACTAACAACCAGCGTGAATTCCAGCGCGTCGAGGGGCTGAGGGTAGAAGACTGGGTAAGC…
MazEF (10H)	Ant	Psyr_0889	85	+	-4	All	MEVKIQQWGNSAAIRLPANVLKQMSLSSGDVLTLDASAEVITLKPAKAKLHYRLADLMAKCDLSAPEPTELAEWNAMQPIGREV	ATGGAAGTGAAAATTCAGCAATGGGGCAATAGCGCTGCAATTCGTTTGCCCGCAAACGTGCTAAAGCAGATGAGCCTGTCTAGCGGCGATGTCCTTACACTTGATGCGTCTGCAGAAGTCATCACGCTCAAACCCGCTAAAGCAAAGTTGCATTATCGATTGGCTGACTTGATGGCAAAATGTGATTTGAGCGCGCCTGAACCCACAGAATTGGCCGAATGGAACGCCATGCAGCCAATTGGACGTGAGGTTTGA
MazEF (10H)	Tx	Psyr_8890	116	+			MKRVKFNRSDIVRLNLNPTAGREQQGDFRPALILTPAAYNASGLVIIVPITQGGDFARYAGFAVPLSGSGTETQGVVLCNQIRTVDLEARGAKRVESVPEMIIDDVLARVQALFE	TTGAAACGGGTTAAATTCAACCGGTCGGATATTGTGCGACTGAACCTGAATCCAACCGCAGGCCGTGAACAACAGGGCGATTTTCGTCCAGCGTTGATTCTGACGCCTGCGGCTTATAACGCATCGGGCCTTGTAATTATTGTACCCATCACGCAGGGCGGCGACTTCGCTCGGTATGCCGGTTTCGCGGTGCCTTTAAGCGGTTCAGGTACCGAAACGCAGGGTGTCGTTCTTTGCAACCAGATTCGAACCGTTGACCTTGAGGCTCGTGGCGCAAAGCGTGTTGAGTCAGTTCCCGAGATGATAATCGACGATGTGCTGGCTCGCGTTCAAGCCCTTTTTGAATAG
HD (15H)	Ant	un-annotated	63	-	32	Sling	MPSISRYNPQAVQQPEPIHLPRRQSPGRSEYRNLTETLVSPYRRDPRVLDYFFHRVSRHPSHN	GTGCCGTCTATTTCACGTTACAACCCACAGGCCGTTCAGCAACCGGAGCCGATACACCTGCCGCGGCGTCAATCACCAGGCAGGTCCGAGTATCGAAACCTTACAGAGACGCTTGTATCGCCATATCGGCGCGATCCACGAGTCCTTGATTATTTTTTTCATCGTGTGTCGAGACATCCCTCCCACAATTGA	Predicted by six frame annotation, lies upstream
HD (15H)	Tx	Psyr_2245	289	-			MVEIIPRPAQDGLAMPSIEQLFDGLHSLPSIPKVAQDLMLQFDNPSSNLESIARNIEKDPVIAAKVLRLANSARFRGSRESSSIEDAAMRLGFNTLRTLVMASAVTGAFKAGPSFDLKGFWLKSFQVAGICRMLAKQTGVDPEIAFTCGVMHNIGELLIQTGAPDVAERLNNAAKAGTPGRAASETLQLGFSYPEVGAELASRWHLPKVIQQAIAYQATPMKAPADASLPRIVAQAITISDALEAHGGATPQAQQASGGPLMEGIDLDALFAGLPAVLEADKAFSELLS	ATGGTTGAAATCATCCCCCGCCCTGCACAGGATGGCCTCGCCATGCCAAGTATCGAGCAACTTTTTGACGGTTTGCACAGCCTCCCGAGTATTCCCAAAGTGGCTCAGGACTTGATGCTGCAATTTGACAATCCCTCTTCGAACCTGGAAAGCATCGCCCGCAACATCGAGAAGGACCCGGTGATTGCCGCCAAGGTACTGCGCCTGGCCAACTCGGCACGCTTTCGCGGCTCGAGGGAATCCTCAAGTATCGAAGACGCGGCCATGCGCCTGGGTTTCAATACGCTGCGTACGCTGGTCATGGCCTCGGCAGTGACCGGTGCATTCAAGGCCGGGCCGAGTTTTGATCTCAAGGGGTTCTGGCTCAAAAGCTTTCAGGTGGCAGGAATCTGCCGGATG…
PezAT (20H)	Ant	PSYR_RS06015	90	+	-14	Sling	MPRSSEDVLSEEAIQELEAQIPAKASLATRMAYEKAKSSGQTVLLSKGGFIVAECADGTEEVVCASTPRRKVATGSFRIGPRSATSART	ATGCCTAGATCTTCAGAAGATGTACTGTCCGAAGAAGCTATTCAGGAGCTGGAAGCTCAGATTCCGGCCAAAGCGTCCCTTGCCACCAGAATGGCCTATGAGAAGGCAAAATCCTCCGGGCAGACAGTGTTGCTGTCCAAAGGAGGATTTATCGTCGCCGAATGTGCGGACGGCACTGAAGAAGTCGTTTGTGCCTCCACGCCGAGACGCAAGGTAGCGACCGGCTCCTTCAGGATCGGCCCAAGGTCCGCTACCAGTGCCCGTACCTAG
PezAT (20H)	Tx	Psyr_1160	249	+			MPVPRLRVFAGPNGSGKSTIKRILDPDLIYIYVNADDLEREAGDNGFIDLSPFSIEDDQQAFRAFFSSHPLIERERLACQAEHFFITAQSLLIEGITFTSYHASVVADFIRHQLLVQSASFTFETVMSDRSKVEFIKKAKAMGYRTYLYFVATENPSININRIAIRVGEGGHNVTPEKVHARYHRCLALLPEAIQATSRAYLFDNSGDTAELEAEITDASIVEYKIDEVPEWCKVAIEGLERLIDPEP	GTGCCCGTACCTAGGCTACGCGTATTTGCCGGCCCTAACGGTTCAGGCAAGAGCACCATCAAGCGCATACTTGATCCTGACCTGATTTACATTTACGTCAATGCCGACGACCTTGAGCGTGAGGCGGGCGATAATGGGTTTATAGATCTTTCCCCTTTTTCGATTGAAGATGATCAGCAAGCTTTCCGGGCGTTTTTCTCCTCGCACCCCCTCATTGAAAGAGAACGGTTGGCTTGTCAGGCTGAGCATTTCTTCATCACCGCCCAATCGCTATTGATTGAAGGCATCACATTCACTTCTTACCACGCCTCGGTCGTTGCTGATTTCATCAGGCATCAATTGCTTGTTCAGTCCGCCAGCTTCACGTTTGAGACAGTCATGTCGGACCGTTCCAAAGTG…
ParDE (32H)	Ant	Psyr_3832	82	+	-11	All	MQSILADVAVSVSELKKNPSAVLSGAHGLPVAVLNHNKVMGYMVPAEVFEAMMERLDDLDLAELIKSRQHEKPVSVDIDDL	ATGCAAAGCATCCTTGCAGATGTCGCGGTCAGCGTCTCTGAACTCAAGAAAAATCCGTCAGCGGTCCTGAGTGGCGCTCATGGTTTACCTGTGGCCGTCCTTAATCACAATAAAGTCATGGGCTACATGGTCCCTGCCGAGGTGTTTGAAGCAATGATGGAGAGGCTTGATGACCTTGATCTGGCCGAGCTGATCAAATCTCGCCAACATGAAAAGCCGGTGTCGGTAGATATAGATGACCTTTAA
ParDE (32H)	Tx	Psyr_3833	97	+			MTFKLEFLPSALKEWEKLGHTIRVQLKKKLLERLGLPRIPGDALHGMPDHYKIKLRSAGYRLVYRVEEDRVVVTVVAVGKRERGNIYDSAKGRLGP	ATGACCTTTAAGCTTGAATTTCTGCCCTCGGCCTTGAAGGAGTGGGAAAAACTGGGCCATACCATCCGTGTTCAGCTCAAGAAAAAGCTTCTCGAACGACTCGGACTACCAAGAATTCCAGGCGATGCGCTTCATGGCATGCCAGATCATTACAAAATCAAACTGCGCAGTGCAGGATACCGACTCGTCTATCGAGTCGAGGAAGATAGGGTAGTGGTAACCGTCGTTGCGGTAGGCAAGCGCGAGCGCGGGAATATTTATGATTCGGCCAAAGGCAGGCTTGGCCCTTGA
Phd-doc (45H)	Ant	PSYR_RS19235	57	+	-1	Sling	MPTLSIQAKKAHFAKVRRSNYAASLRLEGYDCTPLDAERPLPTREELLKTYRNKQA	ATGCCGACGCTCTCAATTCAAGCCAAAAAAGCTCACTTTGCCAAGGTGCGGCGATCCAATTATGCAGCCAGCTTGCGCTTGGAGGGTTATGACTGCACGCCGCTCGACGCCGAGCGTCCTCTTCCGACTCGCGAAGAGCTGTTGAAAACTTACCGTAACAAACAGGCCTGA
Phd_doc (45H)	Tx	Psyr_3720	202	+			MLDKYGANQDPYCYPGTSILKNRLNLTSDDLLSGAERALSEVALSLIEFAPPPYDLSYLKYLHRLLFADLYDWAGELRTVDISKGNTRFCTTTRIEPEAKKIFAPLASVNWLQELEREQLVNASAEAFGDLNVIHPFREGNGRAQRVLFEHLIMNAGYEISWWAVEAEEWMQANIYAVDCEYGPLIDVFEHCIGKPILPET	ATGCTCGATAAATATGGGGCCAACCAGGATCCATACTGCTATCCCGGCACGTCTATTTTGAAAAACCGCTTGAACTTGACTAGCGATGATCTACTGTCAGGCGCGGAGCGCGCACTGTCTGAAGTCGCTTTGAGTCTAATCGAGTTTGCACCGCCTCCATACGATCTCTCGTACCTGAAATACCTCCATCGCCTTCTGTTCGCCGATCTTTACGACTGGGCGGGAGAGCTACGCACTGTAGACATATCCAAAGGGAATACCCGTTTCTGCACCACAACCCGCATCGAGCCTGAGGCGAAAAAAATATTTGCTCCTCTCGCTAGCGTAAACTGGCTTCAAGAGCTGGAACGAGAACAGCTTGTAAACGCCAGCGCCGAAGCTTTCGGTGATCTGAATGTC…
PsyrTA	Ant	Psyr_3805	456	+	4	TADB	MINTNTQSILLLTSYFSKSVGGAKPLSPTEWGRFAQWLNAQGKTPADLVTAEPHAVLEGWHDEKIPLLRIEQLLERGHALALALEKWSRAGLWVLTRSDADYPKALKHHLRNSAPPILFGCGNPRLLNQRGIGVVGARKADDADLAYATSLGKRIAMAGMTVVSGGARGVDEAAMQGGLNEEGTVIGIMADSLLSAALASKWRNGLMSNNLVLVSPFFPEAGFNAGNAMARNKYIYCLSQAAVVVRSETRGGTWNGAIENLKKAWVPLWVKRDTNPESGNYALVSQGAQWLESAAKHVDVHTLSAQAKPESDPEMVPELAPTDQDASISEEDPVRSPPPRDEAPHQLSRDDGRSSQNANSASTHATTIGDLSFYQFFLRKMALRDSPGTAEELSEQWGI…	ATGATAAATACCAATACTCAGTCGATCCTCCTACTAACGTCTTATTTTTCAAAATCTGTAGGTGGTGCCAAACCGCTATCTCCGACGGAATGGGGACGATTTGCCCAATGGCTAAACGCGCAGGGCAAGACGCCTGCAGACTTAGTGACTGCTGAGCCACATGCTGTGCTTGAGGGCTGGCATGATGAAAAAATACCATTGCTGCGCATTGAGCAGTTGCTCGAGCGAGGCCATGCGCTGGCCTTGGCTTTGGAGAAGTGGAGCCGGGCTGGATTGTGGGTGCTGACACGATCAGATGCTGACTATCCTAAGGCGCTCAAGCATCACTTACGTAACAGCGCGCCACCGATACTCTTCGGTTGTGGAAATCCGCGACTGCTGAATCAACGTGGAATTGGT…
PsyrTA	Tx	Psyr_3804	699	+			MQRNDAEKLLKVAINNGAATFRDGQWEAIDALVNHRKKLLVVQRTGWGKSSVYFISTRILRDRGQGPTIIISPLLALMRNQVDAAQRLGINAVTINSTNTDEWEKARQDVHANRVDCLLISPERLANDGFMETFLQPIADRIGLMVIDEAHCISDWGHDFRPDYRRIVNILRFLPPNTPVLGTTATANTRVVNDIQAQFGDINIVRGPLARESLALQNLIMPDQASRLAWLAQTIPTLPGTGIVYALTQRDSEQVARWLRANGIDAASYHSDVAHSDFGNSDQYRQHLEDELLANKLKVLVATTALGMGYDKPDLGFVIHYQAPSSLVAYYQQVGRAGRAIDYSLGLLMSGEEDEKIHAFFRRAAFPPAGQVNHLLSVLAKSNGLTIRELEEHSNLSHG…	ATGCAACGGAACGATGCAGAGAAACTACTGAAAGTCGCCATCAACAACGGAGCCGCTACGTTTAGGGATGGGCAATGGGAGGCGATTGATGCTCTGGTCAACCATCGCAAGAAACTGTTAGTCGTTCAACGCACTGGTTGGGGCAAGAGCTCTGTTTACTTTATCAGCACGCGAATTCTGCGTGATCGAGGGCAAGGCCCAACCATAATCATATCGCCCCTACTAGCCCTGATGCGCAATCAGGTCGACGCAGCTCAGCGACTAGGGATCAATGCCGTTACCATTAACTCTACCAATACTGACGAATGGGAAAAGGCCCGTCAGGATGTGCACGCCAACCGAGTAGATTGCTTGTTGATCTCACCAGAGCGGCTAGCAAATGACGGCTTCATGGAAACC…
hypothetical	Ant	Psyr_1596	113	+	4	TADB	MDLQVISRDGEPEYAVLPWAQYQALLKAAGLAGKPSEPAASTGGTTASELPGFDELRALREAKGLEAASLARTVGISPSYLELIENGTRQPDGAIKRSLAWELGVPGWRGES	ATGGATCTTCAAGTGATATCCCGTGACGGGGAGCCGGAATACGCCGTGCTGCCCTGGGCGCAGTATCAAGCACTGCTCAAGGCCGCCGGCCTGGCCGGCAAGCCTTCCGAGCCGGCTGCCTCGACTGGCGGCACCACCGCCAGTGAGCTTCCCGGGTTCGATGAATTGCGTGCACTGCGCGAGGCCAAAGGCCTTGAAGCGGCAAGTCTGGCGCGTACCGTCGGGATCAGCCCGTCCTATCTGGAACTGATCGAGAACGGTACTCGGCAGCCGGACGGCGCCATCAAACGCAGCCTGGCGTGGGAGCTTGGAGTGCCGGGCTGGCGAGGTGAGTCGTGA
hypothetical	Tx	Psyr_1597	126	+			MSVRISRQHWDGLLNELDLARRQRHLLTYRALVERLQLPSPAMQTLTAALEHLAAMDARAEQPLRSSLVISQGASRLPRPGFFECAERLGRFSGPSDGVAAASWHASEVVRVFEYSYPQVQVQAQ	GTGAGCGTGCGCATCAGTCGTCAGCATTGGGATGGACTGCTCAATGAGCTCGATCTGGCACGTCGCCAACGGCACCTGCTGACCTATCGCGCTCTGGTGGAACGCCTGCAACTGCCCAGCCCGGCCATGCAGACCCTTACGGCCGCCCTTGAGCACCTCGCCGCCATGGATGCCCGCGCTGAACAGCCCTTGCGCAGTTCGCTGGTCATCAGCCAAGGCGCCAGCCGCCTGCCGCGTCCCGGTTTTTTCGAGTGCGCCGAACGCCTTGGCCGTTTCTCCGGACCTTCGGACGGCGTCGCGGCAGCGTCATGGCACGCCTCGGAAGTGGTTCGGGTGTTTGAATACAGTTATCCGCAAGTGCAAGTGCAAGCGCAGTAG
YhaK	Ant	Psyr_1626	285	-	190	TAFinder	MTQFRKVLSIQTGQPASDGAGVKLTRVFGGRGVEQFDPFLMLDEFGSDKPDDYIAGFPPHPHRGFETVTYMLEGRMRHEDHMGNVGLLQGGGVQWMTAARGIIHSEMPEQEEGTMRGFQLWLNLPGKNKLSDASYQDIQPENVPSITTQAGVQVVVLAGHFDDGQVQQAGAVQRPDTEPLYFDFDMPAGSRISPHVPDGHLVLLYVYEGSVELEGSAQPIGKRHMARLSDSGAVQISSTAGARLLLIAGKPLREPIVQYGPFVMNTKEEIEQAIRDFREDRLTA	ATGACTCAATTTCGTAAAGTCCTGTCCATTCAAACGGGTCAGCCAGCGTCCGATGGCGCGGGCGTCAAACTGACGCGCGTCTTCGGCGGGCGTGGTGTGGAGCAGTTCGACCCGTTTCTGATGCTGGACGAGTTCGGATCGGACAAGCCGGATGACTACATCGCCGGCTTTCCACCTCACCCGCACCGTGGCTTCGAAACGGTGACCTACATGCTTGAGGGCCGTATGCGTCATGAAGACCATATGGGCAATGTCGGCCTTCTGCAGGGCGGCGGTGTGCAGTGGATGACCGCAGCACGCGGGATCATTCACAGCGAAATGCCCGAACAGGAAGAAGGCACCATGCGCGGCTTTCAGCTCTGGCTGAACCTACCGGGCAAGAACAAGCTGAGCGACGCC…
YhaK	Tx	Psyr_1627	137	-			MADATLDHQLGLLAHLRSILVALGEAEQVPEESHALFMERFDELVELLPQDPIESQYLGQDILCQVIQRYPQIAHLVPRDLLWFFAGDCLHFMPDDEIELYQALEERRYDAEQNEEPFDWKQEKQLLSMSTQGSKH	ATGGCCGACGCCACTCTCGATCACCAACTTGGCCTGCTGGCACACCTGCGCAGCATTCTGGTCGCGCTGGGCGAGGCCGAGCAGGTTCCGGAAGAAAGCCACGCGCTGTTCATGGAGCGTTTCGACGAACTGGTCGAGCTGCTGCCGCAGGACCCCATCGAAAGCCAGTACCTGGGTCAGGACATCCTCTGCCAGGTCATCCAGCGCTACCCGCAAATCGCGCACCTGGTGCCGCGCGACCTGCTGTGGTTCTTCGCCGGTGACTGCCTGCATTTCATGCCGGATGATGAAATCGAGCTGTATCAGGCGCTGGAAGAGCGCCGCTACGACGCCGAGCAGAACGAAGAACCGTTTGACTGGAAGCAGGAGAAACAGCTGCTGAGCATGTCGACACAGGGC…
HcaE	Ant	Psyr_2707	296	+	145	TAFinder	MQYEITHADLSLVLALVRGRTLARAADLLQVDVSTVFRSIRRLEAALGAALFEKNRRGYIPTDTAQAMAEQAERAEQALAAARIALQQGEQVVSGTVRLTCTDAVLHSLLLPALADFMPQYPALTLELATSNAFANLSRRDADIALRLTNTPPEHLIGRCLGSADYFVCGRAEYREALTQNPASIPWISPDDSMPDHTSVIWRKQAFPGVLPSYRCSNMSAVSQLVAAGLGVAALTGFTVEGLGAVERLSGPLEGCRTDLWLLTRPDCRALRSVQTLLEALAPRLRAALQVSSPG	ATGCAATATGAAATCACCCACGCCGACCTTTCATTGGTGCTCGCCCTGGTTCGCGGCCGCACGCTGGCACGCGCCGCCGATCTGTTGCAGGTTGATGTATCGACCGTATTCCGCTCGATCCGTCGCCTGGAAGCAGCCCTCGGTGCAGCGCTGTTTGAAAAGAACCGGCGCGGGTACATACCGACCGATACCGCGCAGGCCATGGCCGAGCAGGCCGAGCGCGCCGAACAGGCGCTTGCTGCTGCGCGCATCGCCCTGCAACAGGGCGAACAGGTCGTCAGCGGCACGGTACGCCTGACCTGTACCGATGCAGTACTGCATAGCCTGCTATTACCAGCGCTGGCGGACTTCATGCCGCAGTACCCTGCCCTTACGCTGGAGCTGGCCACCTCCAATGCC…
HcaE	Tx	Psyr_2708	355	+			MHPKNAWYVACTADEVADKPLGRQICNEKMVFYRDQNQQVVAVEDFCPHRGAPLSLGYVENGQLVCGYHGLVMGGDGKTVSMPGQRVRGFPCNKTFAAVERYGFIWVWPGDREKADPALIHHLEWAVSDEWAYGGGLFHIQCDYRLMIDNLMDLTHETYVHASSIGQKEIDEAAPVTTVEGEEVVTARHMENIMPPPFWQMALRGNNLADDVPVDRWQICRFTPPSHVLIEVGVAHAGKGGYDAPKEFKASSIVVDFITPETDTSIWYFWGMARNFNPADEALTASIREGQGKIFTEDLEMLERQQQNLLQHPHRNLLKLNIDAGGVQSRKILERLIAAEQAGPGEQIPVMATK	ATGCACCCGAAAAATGCGTGGTACGTCGCTTGCACAGCGGATGAAGTCGCCGACAAGCCTCTGGGCCGGCAGATCTGCAACGAAAAGATGGTGTTCTATCGCGACCAGAACCAGCAGGTCGTGGCCGTCGAAGACTTCTGCCCGCATCGCGGCGCCCCGCTCTCGCTGGGCTATGTCGAGAACGGCCAGCTGGTGTGTGGTTACCACGGGCTGGTCATGGGCGGCGACGGCAAGACTGTTTCGATGCCCGGCCAGCGTGTTCGCGGCTTCCCTTGCAACAAGACCTTCGCCGCGGTCGAGCGCTACGGCTTCATCTGGGTCTGGCCCGGTGACCGGGAAAAAGCCGACCCGGCACTCATTCATCACCTGGAGTGGGCAGTCAGCGACGAATGGGCCTAC…
YncA	Ant	Psyr_3154	215	-	113	TAFinder	MTRHDPTETGTAVTRQRRAPKGEKRREELLDAALQVFSLEGYTGASVAKVAAIVGISVAGLLHHFPSKISLLMGVLERRDEVNGRIAAEVRTDNTLTGLLGGLRAINRSNATAPGVVRAFSILNAESLLENQPAFEWFQTRYERIHAHLLGQFSALVERGEVRADVDLDKIIRQILAMMDGLQIQWLRFPDQVDLVECFDTYIAQVDAAVRARP	ATGACTCGGCATGACCCCACGGAAACGGGCACGGCAGTCACCCGACAGCGACGCGCGCCAAAGGGCGAAAAGCGCCGCGAAGAACTGCTCGATGCAGCCCTGCAAGTGTTTTCCCTTGAAGGCTATACCGGCGCTTCGGTGGCCAAGGTGGCAGCCATCGTCGGTATTTCCGTCGCCGGATTGCTGCACCATTTTCCGAGCAAGATCTCGCTGCTGATGGGCGTGCTGGAGCGACGCGACGAGGTCAACGGCCGAATTGCTGCCGAAGTCCGCACCGATAACACCCTGACCGGTCTGCTCGGCGGCTTGCGCGCGATCAACCGCTCCAACGCTACGGCGCCCGGCGTGGTACGTGCATTTTCGATCCTCAATGCGGAAAGTCTGCTGGAAAACCAGCCT…
YncA	Tx	Psyr_3155	180	-			MTSIFDLRDARDDDMPAVQAIYADHVLHGISSFELEPPDLAELLQRRRMVLAKGLPYMVAERDGDIVGYAYVTPYRPRPGYRFTVEDSVYVRDGLGGQGIGQALLSALVQHCEAGGWRQMIAVIGNSQNIASLRLHERLGFRRVGVFESVGFKHGRWVDTVLMQRMLGEGWGSVPVERT	ATGACTTCAATCTTTGACCTGCGTGACGCCCGCGACGATGACATGCCCGCTGTACAGGCGATTTACGCTGACCACGTGCTACACGGGATTTCCAGCTTCGAGCTGGAGCCGCCTGACCTGGCAGAATTGCTCCAGCGTCGTCGCATGGTCCTCGCCAAAGGCTTGCCTTATATGGTCGCCGAGCGCGATGGCGACATTGTCGGCTATGCCTATGTCACGCCGTATCGGCCACGTCCAGGCTACCGCTTCACCGTGGAGGATTCGGTGTATGTGCGCGATGGGCTCGGCGGGCAGGGGATCGGTCAGGCGCTGTTGAGTGCCCTGGTGCAGCACTGCGAAGCGGGCGGCTGGCGGCAGATGATCGCGGTTATCGGCAACAGCCAGAATATCGCGTCGTTG…
AraJ	Ant	Psyr_4051	105	+	28	TAFinder	MPIDLDDIIKALAHPVRREILTWLKDPRASFPAQEYSIEHGVCAGQIDQRAGLSQSTVSAHLATLQRAGLISSKKVGQWHFFRRNEEVIQAFVQALVEELNNPT	ATGCCTATCGACCTCGACGACATAATAAAAGCCCTGGCCCACCCGGTCCGCCGAGAAATCCTGACCTGGCTGAAAGACCCGCGTGCAAGCTTTCCCGCCCAGGAGTACTCGATCGAACACGGTGTGTGTGCCGGACAGATCGATCAGCGTGCGGGATTGTCACAATCCACTGTCTCGGCCCATCTGGCGACTTTGCAACGCGCTGGCCTGATCAGCAGCAAGAAGGTCGGCCAATGGCATTTCTTCCGACGCAACGAAGAAGTCATACAGGCATTCGTTCAGGCGCTGGTTGAAGAACTGAACAACCCGACCTGA
AraJ	Tx	Psyr_4052	389	+			MPLSLLILALSAFAIGTTEFVIMGLLPDVAADLGVSIPGAGWLVTGYALGVAVGAPFMAMATAKLPRKAALVTLMGIFIIGNLLCALASDYNVLMFARVVTALCHGAFFGIGSVVAAGLVPANRRASAVALMFTGLTLANVLGVPLGTALGQYAGWRSTFWAVTVIGVIALIGLIRFLPTNRNEEKLDMRAELGALRGAGIWLSLTMTALFSASMFTLFTYIAPLLGEVTGVSPNGVTWTLLLIGLGLTAGNVIGGKMADRRLSSTLIGVFVSMAVISTILSWTSAALIPTEITLFLWAVAAFAAVPALQINVVTFGKAAPNLVSTLNIGAFNVGNALGAWVGGSVIAHGLGLTSVPLAAAVLAVLALLITLITFRQTGNPDLAHATH	GTGCCTCTTTCGCTACTCATTCTGGCCCTGAGCGCCTTCGCCATCGGCACCACCGAATTCGTCATCATGGGCCTGCTGCCTGATGTGGCGGCTGACCTTGGCGTATCGATCCCCGGTGCCGGCTGGCTGGTGACCGGCTATGCGCTGGGTGTCGCCGTCGGTGCGCCGTTCATGGCCATGGCCACGGCAAAACTGCCGCGCAAGGCTGCGCTGGTCACGCTGATGGGGATTTTCATCATTGGCAATCTGCTCTGTGCGCTGGCCAGTGACTACAACGTCCTGATGTTCGCCCGCGTGGTGACTGCGCTGTGTCACGGTGCGTTCTTTGGCATCGGCTCGGTGGTTGCCGCAGGTCTGGTGCCCGCCAACCGGCGTGCCTCAGCGGTGGCCTTGATGTTC…
RimL	Ant	Psyr_5058	149	+	15	TAFinder	MTDIRIRRVTVDDHHAWLPLWQAYLRFYNTELAEGVSDTTWQRLMDANEPTHSALAWRGDEAVGMVNFIYHRSNWSINNACYLQDLIVAPEQRGTGIGRQLIEFVYATAKADGCDKVHWLTHETNATAIQLYERIAERPGLIQFRKAL	ATGACCGATATCCGGATTCGCCGCGTTACCGTCGACGATCATCACGCGTGGCTGCCTCTGTGGCAGGCCTACCTGCGCTTCTACAACACCGAGTTGGCCGAAGGCGTCAGCGACACCACCTGGCAACGCCTTATGGACGCGAACGAACCAACTCACTCGGCGCTCGCCTGGCGGGGTGACGAGGCGGTGGGCATGGTGAACTTCATCTACCATCGCTCCAACTGGAGCATCAACAACGCCTGTTACCTGCAAGATCTGATCGTCGCGCCCGAACAACGCGGAACAGGCATCGGCAGGCAACTGATCGAGTTTGTCTACGCCACGGCCAAGGCAGACGGTTGCGACAAGGTGCACTGGCTGACCCACGAAACCAACGCCACGGCCATTCAGTTGTACGAG…
RimL (GNAT)	Tx	Psyr_5059	223	+			MSDTLLDWQAAALPTAHTLTGRFIRLEKLDAARHADDLWAALEGPNADPKLWDYLPYGPFSDRGAFGAWLVGHQAATDPWFYTVVDQQTNKAEGVISLMSIVAAHGRIEIGHVTFGAAMQRTPKGTEAIYLLAREIFALGYRRLEWKCNANNARSKRAAERFGFSYEGTFRQHMVVKGQSRDTEWYSILDSEWPERQNAFARWLAVDNFKNGQQIKGLEAFR	ATGTCCGACACTCTGCTGGACTGGCAAGCCGCTGCACTGCCCACGGCCCATACACTGACAGGCCGTTTCATTCGCCTGGAAAAACTCGATGCCGCGCGTCACGCCGATGACCTGTGGGCGGCACTCGAAGGTCCGAATGCGGACCCGAAGCTGTGGGATTATCTGCCGTACGGGCCGTTCAGTGACCGTGGCGCATTTGGTGCGTGGCTGGTCGGGCACCAGGCGGCCACCGATCCGTGGTTTTACACCGTGGTCGATCAGCAGACCAATAAGGCCGAAGGCGTCATCAGCCTGATGTCGATCGTCGCTGCCCATGGGCGTATCGAGATAGGTCATGTCACCTTCGGCGCGGCCATGCAACGCACGCCCAAAGGCACCGAAGCCATTTACCTGCTGGCC…

## Sheet: 1448A
TA system	partner	gene_label	Len(a.a.)	Strand	Delta	Predictor	AA	Nucleotide
PasTI (1H)	Ant	PSPPH_4211	105	-	-8	Sling	MAEAVIQIEVVYASVQRQVLMTLDVPAGSSVRQALALSGMDREFPELDLAQCAVGIFGKVVADPSTRVLEAGERIEIYRPLLADPMEIRRLRAARAREKRTLPG	ATGGCTGAGGCAGTGATTCAGATTGAGGTGGTGTACGCCTCTGTGCAGCGTCAGGTGTTAATGACGCTGGATGTTCCGGCGGGCTCCTCGGTGCGTCAGGCGCTGGCTCTCAGTGGCATGGACAGGGAGTTTCCCGAGCTGGATCTGGCGCAGTGTGCCGTAGGCATCTTCGGCAAGGTGGTGGCTGATCCTTCCACGCGGGTGCTGGAGGCGGGTGAGCGAATAGAGATCTATCGTCCGCTATTGGCCGATCCCATGGAGATCAGGCGTCTGCGTGCCGCCAGGGCACGGGAGAAACGGACGCTTCCCGGCTGA
PasTI (1H)	Tx	PSPPH_4212	145	-			MTTHIQRSALLPYPAGFLYDLVNDVARYPEFLPWCSSATVLESSEAQMRASLEIAKGGLSQKFMTRNTLTPGESIVMDLVEGPFEQFHGVWTFKPLGEKACKISLDLSFDYAGSIVRATLGPLFNQAANTLVDAFCQRAKELHG	ATGACTACGCATATACAACGCTCTGCTTTACTGCCGTACCCGGCCGGGTTCCTTTATGACCTGGTCAATGATGTGGCTCGTTATCCCGAGTTTCTGCCGTGGTGCTCTTCCGCTACCGTGCTCGAGTCCAGCGAAGCGCAGATGCGCGCCAGCCTGGAAATTGCCAAGGGCGGTCTGAGCCAGAAGTTCATGACGCGCAACACGCTTACCCCAGGCGAGTCGATCGTGATGGACCTGGTTGAGGGGCCATTCGAGCAGTTTCATGGCGTCTGGACATTCAAGCCGCTGGGCGAGAAGGCCTGCAAGATCAGTCTGGATCTGTCATTCGATTATGCCGGCTCTATCGTTCGCGCCACCCTCGGGCCACTGTTCAATCAGGCGGCCAATACGCTGGTGGAT…
RES-Xre (2H)	Ant	PSPPH_0922	150	-	-4	all	MSLPISDYHPALPRQDDFWQHLGIPARGTRLYSALHDGLPYEVFERLAHYTDLNRSTLAEHLGIAPATLQRRLKVRRFNAEESDRLFRLAAVYKAALDLFEDDAEATRLWLANPVYGLGNRRPLEMLATSAEAQAVLDLIGRLEHGVVA	ATGTCTCTTCCTATAAGCGACTACCATCCGGCCCTGCCCCGGCAGGACGATTTCTGGCAGCATCTGGGTATTCCGGCCCGTGGCACGCGCCTGTACTCGGCGCTGCACGACGGTTTGCCGTATGAAGTATTCGAGCGTCTGGCGCATTACACCGACCTGAACCGCTCGACCCTGGCCGAGCATCTGGGCATCGCTCCCGCCACCTTGCAGCGACGCCTCAAGGTGCGCCGCTTCAATGCCGAGGAAAGCGATCGGCTGTTCCGCCTGGCAGCGGTTTACAAAGCAGCGCTGGACCTGTTCGAAGACGATGCCGAAGCGACCCGTCTGTGGCTGGCCAACCCGGTCTATGGGCTGGGCAATCGCAGGCCGCTGGAAATGCTCGCTACCTCGGCCGAGGCG…
RES-Xre (2H)	Tx	PSPPH_0921	154	-			MIAVYRLVKRKWLAQAFDGEGAKLYGGRWNSKGNACVYCAGSESLALLEVLVHLGNAGVARHYAMLELQIGEEHILNARPDTLPPDWREEPAPPATASFGDDWLASGQSLALAVPSVIIPRESNYLLNVQHPEFLAVVATAKELEFVVDPRLG	GTGATTGCAGTCTATCGACTGGTAAAGCGCAAATGGCTGGCTCAGGCGTTCGACGGTGAAGGCGCCAAGCTCTATGGCGGACGCTGGAACAGCAAAGGCAACGCCTGCGTGTACTGCGCAGGCAGCGAATCGCTGGCGCTGCTGGAAGTGCTGGTGCACCTGGGCAACGCTGGCGTGGCCCGACATTACGCGATGCTTGAGCTGCAGATTGGCGAAGAGCACATCCTCAATGCACGGCCGGACACCCTGCCCCCCGACTGGCGCGAAGAGCCCGCACCACCGGCAACAGCCTCGTTCGGCGACGACTGGCTTGCCTCGGGTCAGAGCCTGGCACTGGCCGTGCCCAGCGTGATCATCCCGCGTGAATCGAATTACCTGCTCAACGTCCAGCACCCGGAA…
VapBC (3H)	Ant	PSPPH_3342	84	+	-1	all	MTTTLSSREFNQDTSGAKKAANEGPVFITDRGRPAHVLLSIEAYLQLTGSAASIADLLIMPEHLDIEFEPQRAVITTRPVDLS	ATGACAACTACCCTCTCAAGCCGCGAATTCAACCAAGACACCAGCGGGGCCAAGAAGGCCGCGAATGAAGGCCCGGTGTTCATTACCGACCGAGGCCGCCCTGCCCATGTGCTGCTTTCGATCGAGGCGTACCTGCAACTGACCGGCAGTGCAGCGAGCATCGCTGACCTGTTGATCATGCCGGAGCACCTCGATATCGAATTCGAGCCGCAACGGGCTGTCATCACGACTCGACCGGTTGACCTGTCCTGA
VapBC (3H)	Tx	PSPPH_3343	151	+			MFLLDTDVVSELRKRNADAHVLRWSRTQMASSLFISSITILELETGILRIERRDPTQGAALRMWLEQHVLKAFAGRILTVDTQVARRCAQLHVPDPRSECDALIAAIALVHGMTVVTRNTIDFQSCGVALLNPWVSQLDEEAAVYSRASR	ATGTTCCTGCTCGACACCGACGTGGTGTCCGAACTCAGAAAACGCAACGCCGATGCGCACGTGCTCCGTTGGTCGCGAACCCAGATGGCGTCCAGCCTGTTCATCTCGTCCATCACGATTCTTGAGCTCGAAACAGGTATCCTGCGTATCGAACGCCGCGACCCGACACAGGGCGCAGCATTGCGAATGTGGCTTGAGCAGCATGTATTGAAAGCGTTCGCCGGGCGTATCCTGACAGTCGACACTCAGGTCGCAAGGCGCTGCGCCCAACTGCATGTCCCCGACCCGCGCAGCGAATGCGATGCGTTGATCGCGGCTATTGCGCTGGTGCATGGCATGACCGTGGTCACACGCAACACAATCGACTTTCAGTCGTGCGGGGTCGCGCTGCTCAACCCC…
ParDE (4H)	Ant	PSPPH_A0094	83	+	12	all	MRVETISYLKRNAADLPLDEPLVVTQNGVPAYVVESYADRKRRDESIALVKLLAISSREYSQGKHCSTDELKARLSRRFAQK	ATGCGAGTTGAAACAATAAGTTATCTGAAACGTAACGCAGCCGACCTGCCTCTCGATGAGCCACTGGTTGTCACGCAAAACGGTGTCCCGGCCTACGTGGTGGAGTCTTACGCAGATCGTAAGCGCCGCGATGAGTCGATCGCCTTGGTAAAGCTCCTGGCGATCAGTTCCCGCGAGTACTCCCAAGGCAAGCACTGTTCCACTGACGAACTTAAAGCCCGGTTGAGCAGGAGGTTTGCCCAAAAATAA
ParDE (4H)	Tx	PSPPH_A0095	117	+			MNTFALRFTEVAQQSIEDQVEHLAITQGFSLAAQRINTLIDVIQDKLLSTPLGYPVSPQLSELGVLHYRELNADGYRIFYEVMDADGVTVIVVVLVISGKQSVEQALIRYCLLQPI	ATGAACACGTTTGCACTACGCTTTACCGAGGTTGCCCAGCAAAGCATTGAAGATCAGGTCGAGCACCTGGCTATCACTCAGGGATTCTCATTAGCTGCTCAACGTATAAATACCCTGATCGATGTCATCCAGGACAAGCTCTTGTCCACCCCGTTGGGCTACCCGGTCAGTCCTCAATTGAGTGAGCTGGGCGTACTGCATTATCGTGAGTTGAATGCTGACGGATACCGGATCTTTTATGAGGTGATGGATGCTGATGGCGTTACCGTCATCGTCGTGGTGCTTGTCATTAGTGGAAAACAAAGTGTTGAACAGGCACTCATCCGTTACTGCCTGCTTCAACCTATTTAG
ParDE (11H)	Ant	PSPPH_1760	80	-	-11	all	MSTMSLRLPDEMADTLAHLAKATGRSKSFLALDALREYLTREAWQIAEIQRAIEEADAGEFASTEDVKAVMDKWSGNAG	ATGTCCACAATGTCTCTACGTCTGCCGGACGAAATGGCGGATACCCTTGCACACCTTGCAAAGGCGACCGGGCGCAGCAAGTCATTTTTGGCCCTCGACGCGCTCCGCGAATACCTGACTCGCGAGGCATGGCAGATTGCCGAAATTCAGCGCGCGATTGAAGAAGCCGACGCTGGCGAGTTCGCCAGTACAGAGGACGTAAAAGCTGTCATGGACAAATGGTCTGGCAATGCAGGTTGA
ParDE (11H)	Tx	PSPPH_1759	95	-			MQVEWLKTALKNLDEEAAYIAQDNPAAAAAFVKAIQSSVTQLASFPAMGREGRIAGTREWPLPDLPYLIPYRIRSGRLQVLRIFHTRRQSPPVW	ATGCAGGTTGAGTGGCTTAAAACGGCGCTAAAGAATCTGGATGAGGAGGCAGCGTATATCGCACAGGACAATCCAGCTGCTGCCGCAGCTTTCGTGAAAGCAATTCAATCAAGCGTGACGCAGCTCGCGAGCTTTCCCGCCATGGGCCGGGAAGGACGGATTGCCGGAACCAGAGAATGGCCTCTGCCAGACCTGCCTTACCTGATTCCATATCGCATCCGTAGCGGCCGGCTACAGGTTCTAAGGATTTTCCACACCAGAAGACAATCGCCCCCCGTGTGGTGA
ParDE (12H)	Ant	PSPPH_0159	80	+		all	MASINVRIDDDLKARAYLELEKLGVTPSELLRQTLQYVAERGQLPFKTVLMTEEDEALLATVRERLAAPQRVKVSLDDL	ATGGCGTCTATCAACGTTCGTATCGACGACGATCTCAAAGCGCGTGCTTACCTCGAGCTGGAAAAGCTTGGCGTCACCCCCTCGGAGTTGCTGCGCCAAACCCTGCAGTACGTAGCTGAGCGTGGTCAGCTACCCTTCAAGACGGTTCTGATGACAGAGGAAGACGAAGCGCTGTTGGCAACTGTGCGCGAGCGCCTTGCAGCTCCGCAGCGGGTCAAGGTTTCACTGGATGACCTATAA
ParDE (12H)	Tx	PSPPH_0160	97	+			MTYNLEFDARALKEWHKLGDTVRQQLKKKLATILVAPRVEANRLHALPDCYKIKLRSSGYRLVYQVIDQEVVVFVVAVDKREREEVYRKATDRLGR	ATGACCTATAACCTCGAATTCGATGCGCGGGCTCTAAAGGAATGGCACAAATTAGGAGATACCGTGCGTCAGCAGCTCAAGAAAAAGCTGGCTACGATTCTGGTTGCTCCGCGTGTTGAAGCCAATCGTCTGCATGCATTGCCTGACTGCTACAAAATCAAACTGCGCAGTAGCGGCTATCGGCTGGTTTATCAGGTTATTGACCAAGAGGTTGTGGTCTTCGTGGTTGCGGTAGACAAGCGTGAACGGGAAGAGGTTTATCGCAAGGCGACGGACCGGCTGGGTAGGTAA
VapBC (16H)	Ant	PSPPH_A0137	98	-	-4	all	MIPLMAKTGNYQVANVNVRNLPDEVHRAIRIQAALHGRSTEAEIRDILERAARPEGRVKLGSFLASIAREVGGLTDKEHTLFENTRITSPARAVSFE	GTGATACCACTGATGGCAAAAACTGGTAACTACCAAGTGGCAAACGTGAACGTAAGAAATCTACCCGATGAAGTGCATCGGGCAATCCGCATCCAAGCTGCCCTGCACGGGCGCAGCACCGAGGCCGAAATACGCGACATCTTGGAGCGGGCGGCGAGACCCGAGGGACGTGTGAAACTTGGCTCGTTCCTGGCTTCTATTGCCCGTGAGGTTGGTGGTCTGACCGATAAAGAACACACCTTGTTTGAGAACACGCGCATCACGTCTCCGGCCCGTGCGGTGAGCTTTGAATGA
VapBC (16H)	Tx	PSPPH_A0136	140	-			MILLDTNVISEPQRREPNAHVLDWIDAQALETLYLSTITVAELRAGIALMPVGKRQDSLRENLEKHLLPMFANRVLSFDMTCTKAYAELLAKSRAAGLAVETADAFIAAIALANGFTVATRNTGPFEAAGLNVINPWEA	ATGATCCTGCTCGATACGAACGTAATTTCAGAACCGCAGCGCCGAGAGCCCAATGCCCACGTCCTTGACTGGATCGACGCACAAGCGCTGGAAACGCTTTATCTGTCCACCATCACGGTAGCCGAGTTGCGTGCTGGTATCGCGCTGATGCCTGTCGGAAAACGCCAGGATAGCTTACGTGAAAACCTGGAAAAGCACTTGCTGCCGATGTTCGCCAATAGGGTGCTGTCGTTCGATATGACTTGTACGAAGGCTTATGCCGAGCTGCTGGCCAAGTCCCGCGCAGCCGGGTTGGCGGTCGAAACGGCAGATGCCTTCATTGCAGCCATCGCCCTCGCCAACGGCTTCACCGTTGCCACCCGAAACACTGGCCCTTTCGAGGCTGCCGGGTTGAATGTC…
HigBA (18H)	Ant	PSPPH_B0005	100	-	-4	all	MTTIKQTSTYMAWERRLKDQKAKAAIAARIFRVANGLMGDVSPVGQGVSELRIHVGPGYRVYFQQRGDELILLLCGGDKSSQSRDIETAKRLADQWRQE	ATGACGACGATAAAACAGACATCTACCTACATGGCTTGGGAACGCAGGCTCAAAGACCAAAAGGCCAAAGCTGCAATTGCCGCTCGTATTTTTAGAGTTGCAAATGGCCTGATGGGTGATGTCTCGCCAGTAGGGCAGGGCGTGAGTGAGCTACGGATACACGTTGGCCCTGGTTACCGTGTTTATTTCCAGCAGCGAGGCGATGAATTGATCTTGCTGCTGTGCGGTGGTGACAAGAGCAGCCAATCCCGAGATATCGAAACAGCAAAGAGACTGGCTGATCAATGGAGGCAAGAATGA
HigBA (18H)	Tx	PSPPH_B0006	95	-			MKEQIFDYDPAAALDGPEAIAIFISDAFETGDAEYIAKAMGVVARAKGMSELARETGLSREQLYRSFSSKGNPTLKTMLTVMRALGVDMTARMH	ATGAAAGAACAAATTTTCGATTACGACCCAGCAGCAGCCCTTGACGGGCCTGAGGCAATCGCTATTTTTATCTCTGACGCATTTGAGACGGGGGATGCGGAGTACATCGCGAAGGCTATGGGGGTTGTCGCAAGGGCCAAAGGGATGAGCGAGCTTGCGCGTGAGACAGGTCTTTCTCGAGAGCAGCTTTACAGATCGTTCAGTAGCAAGGGCAACCCAACCTTAAAAACGATGTTGACGGTAATGAGAGCCCTGGGCGTGGACATGACAGCTCGAATGCACTGA
ParDE (19H)	Ant	PSPPH_1543	83	-		all	MASPVLSFRVEEGLVEMLDQLALATDRDRQYHLKRALSRYVEAEAWHLKAIDEGLADIDAGKTINLETVKAKWVARAANRVK	ATGGCATCGCCTGTTTTGTCATTCCGTGTCGAAGAAGGCTTGGTCGAAATGCTCGACCAGCTAGCGCTTGCCACGGACCGTGATCGTCAGTACCACCTGAAACGTGCCTTGTCCCGCTATGTCGAAGCAGAAGCCTGGCACCTGAAAGCCATTGACGAAGGCTTAGCCGACATTGATGCAGGAAAGACGATCAATCTGGAAACGGTTAAAGCCAAGTGGGTAGCACGTGCCGCAAATCGAGTTAAGTGA
ParDE (19H)	Tx	PSPPH_1542	104	-			MPQIELSEKADSDLEAIHEHYAGLMGHQRADEVVSTILESIEQLATFTGMGRPSQAPDVRELALTRYPFLVSYVVRSQVVFIVRVLHERNERLNTSKIPDQFS	GTGCCGCAAATCGAGTTAAGTGAAAAAGCCGATAGCGATCTGGAAGCGATTCATGAGCATTATGCGGGGCTGATGGGCCATCAGAGAGCTGACGAAGTCGTCAGCACCATTCTGGAATCCATTGAGCAGCTCGCAACGTTTACAGGTATGGGACGCCCTTCCCAAGCCCCGGACGTACGCGAGCTGGCACTTACTCGCTACCCCTTCTTAGTGAGCTATGTGGTTCGCAGCCAGGTCGTGTTCATCGTCCGCGTGCTGCATGAACGGAACGAGCGCCTGAACACTTCAAAAATCCCGGATCAATTCAGCTAG
VapBC (22H)	Ant	PSPPH_A0035	67	-	-4	all	MRTTVTIDDALYQRALEVADPAMDKADLFREAVQTFVRIQAAKRLMALGATLPTMEDIARRHEKAL	ATGAGAACGACCGTCACCATCGACGATGCGTTGTACCAACGTGCTCTGGAAGTCGCCGATCCGGCGATGGACAAGGCCGACCTGTTCCGTGAAGCCGTTCAGACGTTTGTGCGCATTCAAGCGGCTAAACGATTGATGGCTTTAGGGGCCACACTGCCAACGATGGAAGACATCGCCCGCCGACACGAGAAGGCACTGTGA
VapBC (22H)	Tx	PSPPH_A0034	126	-			MKGVLVDTSVWVEHFRNNSPELVNLLSQDRVLIHPMVIGELACGTPPDRSNTLTDLGDLRGAQQPTVSEVIAFLNTHKLYGLGCGLVDMTLLASALLSGTALWTLDKRLERLASRMAVSYQPPTH	GTGAAAGGCGTCCTGGTAGACACCTCCGTTTGGGTTGAGCACTTTCGCAACAACAGTCCAGAACTGGTGAACTTGCTCAGCCAGGACCGGGTACTCATACACCCCATGGTGATCGGAGAACTGGCGTGTGGTACGCCGCCTGATCGTTCCAACACCTTGACCGACCTTGGCGACCTACGAGGTGCACAACAACCCACGGTGAGTGAAGTCATAGCCTTTCTGAACACCCACAAGCTCTATGGCCTGGGCTGTGGACTGGTGGATATGACGCTCCTGGCCTCCGCGTTATTGAGCGGCACAGCGCTTTGGACGTTAGACAAGCGCCTGGAGCGTTTGGCTAGCCGCATGGCCGTGTCATACCAGCCTCCTACTCACTAG
VapBC (26H)	Ant	PSPPH_A0051	80	+	-1	all	MNTTRWNVAVSTDTDQSLRMFLASQGGGRKGDLSRFIEEAVRAHILELSAEQAKASNAHLGEAELTEAVDEALDWARKR	ATGAACACCACTCGCTGGAACGTCGCCGTCTCCACCGACACCGACCAATCGCTCCGCATGTTTCTGGCCAGCCAAGGCGGTGGCCGTAAGGGCGACCTGTCGCGCTTCATCGAAGAAGCTGTGCGAGCACACATCCTAGAACTGAGCGCCGAACAGGCCAAGGCTTCTAACGCCCATCTGGGTGAGGCCGAACTAACCGAAGCGGTTGATGAAGCGCTCGACTGGGCACGTAAGCGCTGA
VapBC (26H)	Tx	PSPPH_A0052	137	+			MRVVLDTNILFSALISPHGAPDAIYRAWRSARFEVVTSRAQLDEIRRASRYPKLQAILQPAKVGAMINNLQRATVLERLTIEIEADDPDDSFLLAMALAGNADYLVTGDRRAGLLQRGHIERTRIVTPAVFCAEAL	ATGCGGGTCGTATTGGACACCAACATACTGTTCAGTGCGCTGATCTCACCGCATGGGGCACCCGATGCAATCTATCGAGCCTGGCGTTCGGCTCGGTTTGAGGTAGTGACCTCACGGGCACAGCTCGATGAAATTCGTCGGGCCAGTCGTTACCCCAAGCTACAGGCCATCCTGCAGCCTGCCAAAGTGGGAGCCATGATCAATAACCTGCAACGAGCGACGGTGCTGGAGCGCTTGACCATCGAGATTGAAGCCGATGATCCGGATGACTCTTTTCTGCTGGCCATGGCTTTGGCGGGCAATGCGGACTACCTGGTAACCGGTGATCGCCGCGCAGGCCTCTTGCAACGTGGGCATATCGAACGCACGCGGATTGTCACTCCGGCCGTGTTTTGCGCC…
HigBA (28H)	Ant	PSPPH_A0021	44	+	-1	sling	MTESNQAFSSVWDALEDSPAEAENMRIRTSLMTAIRDFIEVRQLSQADAAQLFNVTQPRISELQRGKIDLFSVDRLINMLAQGGMHVEVSVKTAA	ATGACTGAATCAAATCAAGCCTTCAGCAGCGTCTGGGACGCCCTGGAGGACTCACCAGCCGAAGCAGAAAACATGCGTATTCGCACCAGCCTAATGACGGCTATCCGAGACTTTATCGAGGTGCGTCAGCTCTCGCAGGCTGACGCTGCGCAGCTGTTCAACGTAACGCAACCCCGCATTTCAGAACTCCAGCGCGGGAAGATCGACCTTTTCAGCGTGGATCGATTGATCAACATGCTCGCCCAGGGCGGCATGCACGTTGAAGTCAGTGTCAAAACTGCAGCTTGA
HigBA (28H)	Tx	PSPPH_RS26575	96	+			VIYIAKLATAVYVLHCFQKKTQKTSKHDLDLAAKRMKELIKELN	GTGATCTACATTGCGAAATTAGCGACGGCGGTTTATGTCCTGCACTGCTTCCAAAAGAAGACGCAAAAAACGAGCAAGCATGACCTTGACCTCGCCGCCAAGCGGATGAAAGAACTGATTAAGGAGTTGAACTAA	Six-frame translation by Sling, the existing annotation seems contain stop codon s in the middle
PasTI (29H)	Ant	unannotated	59	+	3	sling	MHYPVRSARKPARAFLGLHNDKTPHRKRNEGFRNSILTMTYSHMGKPHTTIGDASFHC	ATGCACTATCCAGTCCGCTCAGCGCGAAAACCTGCGCGGGCTTTTTTGGGGCTCCATAACGACAAAACCCCTCATCGCAAACGCAATGAGGGGTTTCGGAATTCAATCTTGACGATGACCTACTCTCACATGGGGAAACCCCACACTACCATCGGCGATGCATCGTTTCACTGCTGA	Six-frame annotation
PasTI (29H)	Tx	PSPPH_5091	159	+			MSTLHSNLKPDTLIQNPVSCRVASAVEVPGNAASVWAVVGNFGGFQAFIPALDSIEVTGEGKGSVRRKLFKDGNVAIEQLNSRDDQALYMTWSLIHTSLPVSNLWAAMTVEATGDDACVARWTIVADPVQGGPEGDAFEAFLQGFADGAMSNVRSLFG	ATGAGCACACTTCACAGTAATCTGAAGCCTGACACCCTTATCCAGAACCCGGTGTCGTGCCGAGTGGCTTCAGCCGTGGAAGTCCCCGGTAATGCAGCCAGCGTATGGGCTGTGGTCGGGAATTTTGGTGGTTTCCAAGCCTTCATACCCGCGCTGGACAGCATTGAGGTCACAGGGGAAGGTAAGGGCTCGGTTCGAAGGAAACTGTTCAAGGACGGCAACGTGGCCATCGAACAACTGAACTCCCGGGATGATCAGGCGCTGTACATGACCTGGTCACTGATCCACACCAGTTTACCGGTGAGTAACCTATGGGCGGCAATGACTGTTGAAGCTACCGGGGACGATGCGTGTGTCGCTCGTTGGACGATCGTTGCCGACCCTGTTCAGGGAGGCCCT…
MazEF (33H)	Ant	PSPPH_RS27115	75	-	-4	sling	MPTSHVNTRVQRHRDALRAAGLRPIQIWVPDTRRPDFAQECHRQCLLVAQADMANTYMQGLMDEALDDVEGWTP	ATGCCTACATCCCATGTAAATACCCGCGTTCAACGCCATCGCGACGCGCTGCGTGCGGCTGGCCTACGGCCCATTCAGATTTGGGTTCCCGATACCCGGCGGCCAGACTTTGCACAGGAGTGCCATCGACAGTGCCTGTTGGTTGCTCAGGCAGACATGGCCAATACCTATATGCAGGGGTTGATGGACGAAGCCTTAGACGATGTTGAGGGTTGGACGCCATGA
MazEF (33H)	Tx	PSPPH_A0142	109	-			MMRGDLVTVAMQGDFGKPRPALVIQANQFSEHTSVTVLPVTSTLVAAPLLRITVQPTAENGLQKPSQVMLDKTMTLKREKIGPTFGHIGVDSMVEVERCLAVFLGIAN	ATGATGCGAGGTGACCTAGTCACCGTCGCCATGCAAGGTGACTTTGGTAAACCAAGACCCGCCTTGGTAATTCAGGCAAACCAATTTAGCGAACACACCAGCGTTACCGTGCTTCCAGTGACCAGCACCCTAGTCGCAGCACCGCTGCTGCGCATCACCGTTCAGCCGACCGCAGAAAACGGCTTGCAGAAGCCTTCTCAGGTCATGCTAGACAAGACCATGACCCTCAAGCGTGAAAAAATAGGCCCGACTTTTGGGCATATCGGAGTGGATTCAATGGTGGAGGTGGAGCGCTGTTTAGCCGTGTTCTTGGGTATCGCCAATTGA
ParDE (38H)	Ant	PSPPH_A0004	63	+	-1	All	MANLSPIVSEFETDEQAASYDRWFRAKVAASLADPRPAIPHDEVMAEIEALIDQVETQREKR	ATGGCCAACCTCTCACCCATCGTTTCAGAATTCGAAACCGATGAACAGGCCGCAAGCTACGACCGCTGGTTTCGCGCCAAGGTCGCCGCCAGTCTGGCCGATCCGCGTCCGGCCATCCCTCATGATGAGGTCATGGCGGAAATAGAAGCGCTGATCGATCAGGTTGAAACCCAACGTGAGAAACGCTGA
ParDE (38H)	Tx	PSPPH_A0005	94	+			MLPVVWLSPALDDLREIATYIAWENPSAARRLKSLLQEAIEPVAEHPYLYRSGRAPGTRELVAHPNYVLVYRVTLKRIEVVNVIHARQEYPSP	ATGCTGCCGGTGGTCTGGCTCAGTCCCGCACTGGATGATCTGCGCGAAATCGCAACCTACATCGCATGGGAAAACCCGAGCGCAGCGCGCCGGTTGAAAAGCCTCCTGCAGGAGGCTATCGAGCCGGTAGCCGAACACCCCTATTTATATCGTTCTGGGCGAGCGCCAGGCACTCGCGAGCTGGTGGCTCACCCAAACTACGTCTTGGTCTATCGTGTCACCCTCAAGCGCATCGAGGTCGTGAACGTAATCCACGCTAGGCAGGAATACCCCTCTCCCTGA
ParDE (38H)	Ant	PSPPH_A0070	63	+	-1	All	MANLSPIVSEFETDEQAASYDRWFRAKVAASLADPRPAIPHDEVMAEIEALIDQVETQREKR	ATGGCCAACCTCTCACCCATCGTTTCAGAATTCGAAACCGATGAACAGGCCGCAAGCTACGACCGCTGGTTTCGCGCCAAGGTCGCCGCCAGTCTGGCCGATCCGCGTCCGGCCATCCCTCATGATGAGGTCATGGCGGAAATAGAAGCGCTGATCGATCAGGTTGAAACCCAACGTGAGAAACGCTGA
ParDE (38H)	Tx	PSPPH_A0071	94	+			MLPVVWLSPALDDLREIATYIAWENPSAARRLKSLLQEAIEPVAEHPYLYRSGRAPGTRELVAHPNYVLVYRVTLKRIEVVNVIHARQEYPSP	ATGCTGCCGGTGGTCTGGCTCAGTCCCGCACTGGATGATCTGCGCGAAATCGCAACCTACATCGCATGGGAAAACCCGAGCGCAGCGCGCCGGTTGAAAAGCCTCCTGCAGGAGGCTATCGAGCCGGTAGCCGAACACCCCTATTTATATCGTTCTGGGCGAGCGCCAGGCACTCGCGAGCTGGTGGCTCACCCAAACTACGTCTTGGTCTATCGTGTCACCCTCAAGCGCATCGAGGTCGTGAACGTAATCCACGCTAGGCAGGAATACCCCTCTCCCTGA
HD (67H)	Ant	unannotated	57	-	65	Sling	MHASQAKQIRLITLDEAFCKDKQCLIGDMNSYYKDFNHLNAKGAGLLAGQISRILDQ	ATGCACGCCAGCCAGGCGAAGCAGATCAGGTTGATCACCCTGGATGAAGCCTTTTGCAAGGACAAGCAATGCCTGATTGGCGATATGAACTCGTACTACAAGGACTTCAATCACCTCAACGCCAAGGGCGCAGGGCTGCTTGCCGGCCAGATCAGCCGAATTCTTGACCAGTGA	upstream of toxin by six frame annotation
HD (67H)	Tx	PSPPH_0892	220	-			MTAASFAPFQDMASLLIPHTHAEKIDGAHDVSHLLRVWKNVCAIRDREGGDARVLIAATLLHDCVSVEKDSPFRSSASRLAAARARELLTEMGWDEESIAAVAHAIEAHSFSAAITPLTLEARILQDADRLDSLGMIGVARTFYVSGRMGRQLYEPNDPHASQRPYDDRNFAADHFHTKLLHLADSFQTDTGTQMAKIRHDRLKRFLDELMEEIGAPQP	ATGACCGCCGCCAGCTTCGCCCCGTTTCAGGATATGGCCAGCCTGCTGATCCCGCATACTCATGCAGAGAAAATCGATGGCGCGCACGACGTATCGCACTTGCTGCGCGTCTGGAAAAACGTCTGCGCCATCCGTGACCGGGAAGGCGGCGATGCCCGCGTACTGATCGCCGCCACGCTGTTACACGACTGTGTTTCGGTCGAGAAAGACTCACCGTTTCGCTCCAGTGCTTCGCGACTGGCGGCAGCACGGGCCCGCGAATTGCTTACCGAGATGGGCTGGGACGAAGAAAGTATCGCTGCGGTTGCCCATGCTATCGAAGCGCACAGTTTTTCGGCGGCGATAACTCCGTTGACGCTGGAAGCCCGAATTCTGCAGGACGCCGACCGCCTGGATTCT…
DinJ-YafQ (70H)	Ant	PSPPH_B0056	88	-	-14	All	MSANAVVRARIDEHIKEEATAVLAAMGLTVSDAFRIMLTRVAREKALPFEPLVPNATTIEAMKEARRGGLKSFASVEDLMADLNADD	ATGTCTGCAAATGCAGTTGTCCGTGCCCGCATTGACGAGCACATCAAGGAAGAGGCGACCGCCGTACTGGCGGCGATGGGACTGACCGTGTCTGACGCCTTCCGCATCATGTTGACCCGCGTCGCCCGCGAGAAAGCCTTGCCGTTCGAGCCTTTGGTGCCGAACGCCACCACCATCGAGGCGATGAAGGAAGCGCGCCGTGGCGGCTTGAAGTCGTTCGCTTCCGTCGAGGATCTGATGGCGGATCTGAATGCGGACGATTGA
DinJ-YafQ (70H)	Tx	PSPPH_B0055	94	-			MRTIEQTSRFKRDYKREAKGPHRQTLASDFIAVVTALANNQPLAEKHRDHALTGDWKDHRDCHIKPDLVLIYRKPDDAVLQLVRLGSHSELGL	ATGCGGACGATTGAACAGACCAGCCGGTTCAAACGCGATTACAAACGCGAAGCCAAAGGCCCGCATCGTCAGACGCTGGCGAGCGATTTCATTGCCGTCGTCACAGCCCTGGCGAATAACCAGCCTCTGGCCGAGAAGCACCGTGACCACGCCCTCACCGGCGACTGGAAAGACCACCGGGACTGTCACATCAAGCCCGACCTGGTGTTGATTTACCGCAAGCCGGATGACGCCGTGCTGCAACTCGTGCGTCTCGGATCGCATAGCGAGCTTGGCCTGTAA
ParDE (73H)	Ant	PSPPH_A0102	96	+	-1	All	MSEATFTFRVDGVLKDEFSTAAKARDRSSAQLLRDFMREFVQTQREASEHEAWFREQVQIGLNSANAGHLTSATEVETKFALKRAATRRRLEASN	ATGAGTGAGGCCACATTTACGTTCCGGGTGGATGGAGTACTGAAAGACGAGTTTTCTACAGCCGCCAAGGCCCGCGACCGCAGCAGCGCGCAGCTCCTGCGGGACTTCATGCGCGAGTTCGTACAGACGCAGCGCGAAGCGTCCGAACATGAGGCTTGGTTCCGCGAGCAAGTTCAGATCGGCTTGAATTCAGCTAATGCTGGTCACCTAACTTCGGCGACCGAGGTTGAAACCAAGTTTGCGCTTAAGCGGGCAGCTACACGTCGCCGGCTTGAGGCATCCAATTGA
ParDE (73H)	Tx	PSPPH_A0103	93	+			MKLFWTPEAVQDRDRIYDYIEADNPSAALALDELFEERSGRLVDHPGIGKPGRIVGTCELVAHRNYILVYDVVDNAVRVLRVLHAARHWPPS	ATGAAACTGTTTTGGACGCCCGAGGCAGTACAAGACCGTGACAGAATCTATGACTACATCGAGGCCGACAATCCAAGTGCGGCACTAGCCCTTGACGAGTTATTTGAAGAGCGATCTGGCCGCCTGGTCGATCATCCAGGCATAGGCAAGCCAGGCCGTATTGTTGGGACTTGCGAGTTGGTCGCCCACCGAAATTACATTCTTGTCTATGACGTGGTCGACAATGCCGTGCGAGTTTTACGTGTACTGCACGCTGCTCGGCATTGGCCACCGTCCTGA
HipA-like	Ant	PSPPH_4692	278	-		TAFinder/TADB	MPSTHWIDLARDLDTGIETLHAHFQGHAYDPHWHDSYLVGVTRQGVQQFNCRRQRHASTPGQVFTLEPGEIHDGNAPCAEGFTYQMLYLDPHWLSRELSGLFEQAPDQHLPSFANTLQTESRLAHAVTFAFTALHQKELRIVRQSALDELLAQLIDRVQWRRMTDPDPRLPQVALRARDYLHAHLHQDVGMNELATVCGVDRFRLTRAFKATFGLPPHAYLVQLRLAKARRMLAAGIWPAQVASDLGFADQSHLGRWFMRAYGLSPAAYRLRCSNLPD	ATGCCTTCCACACACTGGATAGACCTCGCTCGCGACCTTGATACAGGCATCGAGACGCTGCACCGCACTTTCAGGGGCATGCCTATGATCCCCATTGGCATGACAGCTATCTGGTGGGCGTTACCCGGCAAGGTGTGCAGCAGTTCAATTGCCGCCGTCAGCGCCATGCCAGCACGCCCGGGCAGGTGTTCACGCTGGAACCGGGGGAAATTCATGATGGCAATGCCCCGTGCGCCGAAGGGTTCACCTATCAGATGCTGTACCTGGACCCGCATTGGCTGAGCCGGGAGCTCAGTGGGTTGTTCGAACAGGCTCCCGACCAGCATCTGCCTTCTTTCGCCAACACCCTGCAAACCGAATCACGGCTGGCTCACGCGGTCACGTTCGCTTTCACGGCGC…
HipA-like	Tx	PSPPH_4693	129	-			MAQLFAIVTLSCIVGNGDAHLKNFGLLYSNPTQRDARLAPAYDIVNTTAYIPEDVLALDLLGNSLFASRQGLLDFAQICDVTRPEEVISGQLQALEQVLASSVELNERAPEVIAAVRRCAEPFMKTFG	TTGGCCCAGCTATTCGCCATCGTGACCCTGAGCTGTATTGTCGGCAACGGCGACGCCCACCTGAAAACTTCGGTCTGCTGTATTCCAACCCCACCCAGCGAGATGCACGGCTCGCTCCAGCTTACGATATCGTCAACACCACGGCTTACATCCCCGAGGACGTGTTGGCACTGGATCTGCTCGGCAACAAGTCGCTATTCGCCTCGCGGCAGGGCCTACTGGATTTCGCCCAGATCTGTGATGTGACACGTCCAGAGGAGGTGATTTCCGGACAACTTCAGGCACTGGAGCAAGTACTGGCGAGTTCGGTTGAGCTGAACGAGCGGGCGCCGGAGGTCATCGCTGCGGTCAGGCGATGTGCTGAGCCGTTTATGAAAACTTTTGGATAG
Cog3832	Ant	PSPPH_1735	367	+	86	TAFinder	MPKTGRPRSIAAEHYPVLVKLAHAQPYSSQAELALVFFAETGITAHPDTFAKALKMAGITRVKQRAKGSFQSEPNKAYGYNETHRRQLPEQLYPSCLTDTEWALVADLFESQGGRGVPPLHSRRTLLEACCYVVRTGCSWRMLPRDFPHWDNVYKTFRRWSAQGKFEQMHDRLRAQWREREERADSPSAAILDSQSTRSSPQGGDSGYDAGKKVKGRKRSLIVDTLGLLLAVSISAASVQDRDAADDAVAYSKEKYPSLSTLFVDSAYAGKWAQRTHQLHAIDVQVIRGPNNRRTGQWHSEQGDLFSVEPVQTGFVVMPKRWVVERTHAWNERARRLIMHHDCLFAVSEAWVWLAEARILARRLTT	ATGCCTAAAACCGGACGTCCTCGCTCGATTGCCGCCGAGCACTATCCCGTGCTGGTGAAACTCGCTCATGCACAGCCCTATTCCAGCCAGGCCGAATTGGCGCTCGTATTCTTCGCCGAAACCGGTATCACTGCGCATCCCGACACCTTTGCAAAAGCGTTGAAAATGGCAGGGATTACGCGTGTAAAGCAGCGGGCCAAGGGAAGTTTTCAGTCACCTGAACCTAATAAAGCCTATGGCTACAATGAAACCCACCGCCGCCAACTGCCGGAGCAGCTATATCCGAGTTGCTTGACAGATACCGAGTGGGCACTGGTCGCCGACCTGTTTGAAAGCCAGGGCGGACGAGGAGTGCCACCGCTTCACTCTCGGCGCACGTTGCTGGAAGCCTGTTGCTAT…
Cog3832	Tx	PSPPH_1734	227	+			MDVEAADLSLAAVAGAIADPARSRMLCALLDGRARTATELAALADIGASSASGHFARLREQGLVEMLVQGHRYYRLTNAQVAQALEALLLLTQHSAAPFKPNTPSALRQARTCYDHCAGEVAVKLHDALLKAGWLNEQGKDVISERGVESLNALGIDVDAVRQQRRRLAYACLDWSERAPHIGGALGAALLELMLTRGWVSRHLDSRALKLTAKGVGGMAKVFGV	ATGGATGTTGAAGCCGCAGACCTCTCGCTGGCGGCAGTGGCGGGTGCCATTGCTGACCCAGCACGATCCCGAATGCTTTGCGCGCTACTGGACGGGCGCGCACGAACCGCGACCGAGCTGGCGGCGCTGGCCGATATAGGCGCATCGAGTGCCAGCGGCCATTTCGCGCGTTTGCGTGAGCAGGGGCTGGTGGAAATGCTCGTACAGGGCCGGCATCGTTACTATCGACTGACCAATGCGCAGGTGGCGCAAGCGCTGGAAGCCTTGCTGTTACTGACTCAACACAGCGCTGCGCCCTTCAAACCCAACACGCCTTCGGCCTTGAGACAGGCTCGAACCTGTTACGACCACTGCGCCGGTGAAGTCGCCGTCAAGTTGCACGACGCCTTACTGAAGGCC…
HigBA	Ant	PSPPH_0159	80	+	162	TAFinder	MASINVRIDDDLKARAYLELEKLGVTPSELLRQTLQYVAERGQLPFKTVLMTEEDEALLATVRERLAAPQRVKVSLDDL	ATGGCGTCTATCAACGTTCGTATCGACGACGATCTCAAAGCGCGTGCTTACCTCGAGCTGGAAAAGCTTGGCGTCACCCCCTCGGAGTTGCTGCGCCAAACCCTGCAGTACGTAGCTGAGCGTGGTCAGCTACCCTTCAAGACGGTTCTGATGACAGAGGAAGACGAAGCGCTGTTGGCAACTGTGCGCGAGCGCCTTGCAGCTCCGCAGCGGGTCAAGGTTTCACTGGATGACCTATAA
HigBA	Tx	PSPPH_0158	158	+			MPLTRKTEPDITLVMVQPEDFETLVAIRIEAMRESLERVGRFDPVRARERFREGFSAPCTHYIQVDGSKVGFMVVKPTSDGLLLDHLYIKPAFQGQGIGSAVLRQVFAQADATASTVRVGALKESDSNRFYIRHGFQLVESGEFDNYYVRPQRLPMC	ATGCCGTTGACCCGCAAGACCGAGCCCGACATTACCTTGGTAATGGTCCAACCCGAAGACTTCGAAACCTTGGTGGCCATACGTATCGAAGCCATGCGCGAAAGCCTCGAGCGCGTTGGCCGGTTCGACCCGGTGCGCGCCCGAGAGCGTTTTCGTGAAGGGTTTTCTGCGCCATGCACACACTACATCCAGGTAGACGGCAGTAAGGTCGGCTTTATGGTCGTCAAACCGACCAGCGATGGCCTGTTGCTGGATCACCTATACATCAAGCCCGCCTTTCAAGGGCAGGGCATTGGTTCTGCAGTGCTTCGGCAGGTGTTCGCGCAAGCAGACGCAACCGCCTCGACAGTACGGGTAGGCGCCCTGAAAGAAAGCGACTCAAACCGCTTCTACATTCGC…
Pfam11723	Ant	PSPPH_2476	296	-	147	TAFinder	MQYEITHADLSLVLALVRGRTLARAADLLHVDISTVFRSIRRLESALGAALFEKNRRGYIPTDAAQAMAEQAEHAEQALAAARIALQQGEQVVSGTVRLTCTDAVLHSLLLPTLADFMPQYPALTLELATSNAFANLSRRDADIALRLTNTPPEHLIGRCLGSADYFICGRPEYHDALTHSPASIPWISPDDSMPDHTSVIWRKQAFPAVSPRYRCSNSAVSQLVAAGLGVAALTDFTIQGLGSVERLSEPLQGCSTDLWLLTRPDCRALRSVQTLLEALAPRLRAALLASRSA	ATGCAATATGAAATCACCCATGCCGATCTCTCTCTGGTACTGGCGCTGGTACGCGGCCGAACTCTGGCGCGTGCTGCAGATTTGCTGCACGTTGATATTTCTACAGTGTTCCGCTCGATCCGACGCCTGGAGTCAGCCCTTGGTGCTGCGCTGTTTGAAAAGAACCGACGCGGCTACATTCCGACGGATGCCGCCCAGGCCATGGCCGAGCAGGCGGAACACGCCGAACAGGCACTCGCCGCTGCCCGTATTGCCTTGCAGCAAGGCGAACAGGTCGTCAGCGGTACGGTACGCCTGACGTGCACCGACGCGGTATTGCACAGCCTGCTGCTGCCAACGCTCGCGGACTTCATGCCGCAGTACCCTGCTCTCACGCTGGAACTGGCCACCTCCAATGCG…
Pfam11723	Tx	PSPPH_2475	355	-			MHPKNAWYVACTADEVADKPLGRQICNERMVFYRDQNQQVVALEDFCPHRGAPLSLGYVENGQLVCGHGLVMGGDGKTAAMPGQRVRGFPCNKTFAAVERYGFIWVWPGDREKADPALIHHLEWAVSDEWAYGGGLFHIQCDYRLMIDNLMDLTHETYVHASSIGQKEIDEAAPVTTVEGEEVITARHMENIMPPPFWQMALRGNNLADDVPVDRWQICRFTPPSHVLIEVGVAHAGKGGYHALHEFKASSIVVDFITPETDTSIWYFWGMARNFNPADEQLTATIREGQRKIFSEDLEMLERQQQNLLQHPQRNLLKLNIDAGGVQSRKILERLIAAERASTAEQIPVMATK	ATGCACCCGAAAAATGCGTGGTACGTCGCCTGTACAGCGGATGAAGTCGCCGACAAGCCTCTGGGCCGGCAGATCTGCAACGAAAGGATGGTCTTCTATCGCGACCAGAACCAGCAAGTTGTCGCCTTGGAAGATTTCTGCCCGCACCGCGGTGCTCCGCTGTCGCTGGGTTATGTCGAGAACGGCCAACTGGTATGCGGTTATCACGGGCTGGTGATGGGCGGCGATGGCAAGACCGCCGCGATGCCCGGCCAGCGTGTTCGAGGCTTCCCCTGCAACAAAACCTTCGCAGCGGTCGAGCGCTACGGCTTCATATGGGTCTGGCCTGGCGACCGGGAGAAGGCCGATCCGGCGCTCATCCACCATCTGGAGTGGGCGGTCAGCGACGAATGGGCCTAC…
pfam12568	Ant	PSPPH_4056	105	+	28	TAFinder	MPIDLDDIIKALAHPVRREILTWLKDPRASFPAQQYSIEHGVCAGQIDQRAGLSQSTVSAHLATLQRAGLISSKKVGQWHFFRRNEEVIQAFVQALVEELNNPT
pfam12568	Tx	PSPPH_4057	389	+			MPLSLLILALSAFAIGTTEFVIMGLLPDVAADLGVSIPGAGWLVTGYALGVAVGAPFMAMATAKLPRKAALVTLMGIFIIGNLLCALASDYNVLMFARVVTALCHGAFFGIGSVVAAGLVPANRRASAVALMFTGLTLANVLGVPLGTALGQYAGWRSTFWAVTVIGVIALIGLIRFLPTNRNEEKLDMRAELAALKGAGIWLSLTMTALFSASMFTLFTYIAPLLGEVTGVSPKGMTWTLLLIGLGLTAGNVIGGKMADRRVSSTLIAVFVSMAVISTALSWTSAALIPTETLFLWAVAAFAAVPALQINVVTFGKAAPNLVSTLNIGAFNVGNALGAWVGGSVIAHGLGLTSVPLAAAMLAVLALLITLITFRQTGNPDLAPATH
pfam14367	Ant	PSPPH_5057	379	-	-1	TAFinder	MSQAAFVNPSILTWSRERAGLSAAQVARKLPVKPERIKEWEAGKARPTFLQAQKWASVAHVPFGFLFLPQPPVEQLPLPDLRTVGNSAPLRPSLELVDTVKDAIRKQDWYLEYLHVQEHQPLPFVGRFDSRTPVKTVVSDIRQTLGVDPEKSRLDYDKYSRALIDAAEVAGVLVMRSGIALGNTHRKLEVSEFRGFAISNSLAPVVFINSSDAPTARLFTLMHELAHLWIGSSGVSDAGTANGREEERFCNAVAGEFLVPEELFRAVWNAGIEWESNLAPLATRFHVSKLVIGRRAMDLGYVTQEQYGLYYQKVLKAFREEKGGAGDYYRNATAKNSTRLSKAVLTETLSGRMLLREAGSLLGVQPAKLRTLAETLGR	ATGAGCCAAGCCGCGTTCGTTAACCCAAGCATCCTCACGTGGTCCCGCGAGCGGGCAGGCCTGTCTGCCGCCCAGGTCGCCAGAAAGCTGCCTGTGAAACCTGAGCGTATCAAGGAGTGGGAAGCAGGAAAGGCGAGACCAACCTTTTTGCAAGCCCAGAAGTGGGCGAGCGTTGCGCATGTTCCCTTTGGGTTTTTGTTCTTGCCTCAGCCTCCTGTCGAACAGCTGCCGCTACCAGACTTGCGCACAGTCGGTAACTCGGCACCCTTGCGGCCAAGTCTGGAGCTTGTGGACACAGTAAAAGACGCAATTCGCAAACAGGACTGGTATCTGGAATACCTTCACGTACAAGAGCACCAGCCTCTTCCGTTCGTCGGTCGCTTCGACAGCCGGACTCCG…
pfam14367	Tx	PSPPH_5056	163	-			MFLMDSNTLIEAKNRYYGMTICPAYWQWLLLQNQTFFLASIGPVKDELTKGHDELADWAKNNSTFFQSISDEKTQAEFVKVATLVAQAQGMKTGAMEEFLKGADPWLIAKALTSGATVVTHEVRNLDAKRKFIIPNLCEQLKVPYMNTFELLHHLNARFVLP	ATGTTTCTGATGGACTCCAACACCCTGATTGAAGCCAAGAATCGCTATTACGGCATGACGATTTGTCCGGCTTATTGGCAATGGTTGCTGCTTCAAAACCAGACATTTTTCTTGGCCAGTATCGGTCCTGTTAAAGACGAACTTACCAAAGGCCATGATGAGCTGGCTGACTGGGCAAAAAATAATTCGACTTTTTTCCAAAGCATTTCGGATGAAAAGACTCAGGCCGAATTCGTGAAAGTCGCTACGTTGGTAGCACAAGCGCAAGGCATGAAGACTGGAGCAATGGAGGAGTTTCTTAAGGGGGCCGATCCATGGCTGATCGCCAAGGCCCTGACATCCGGAGCAACCGTAGTTACGCATGAGGTGCGTAATCTGGACGCAAAGCGAAAGTTCATC…
pfam13420	Ant	PSPPH_5140	149	+	15	TAFinder	MTDVRIRVVTVNDHKAWLPLWQAYLRFYNTELAEGVSDVTWQRLVDSHEPTHSALAWLDGEAVGMVNFIYHRSNWSINNACYLQDLIVAPEQRGTGIGRQLIEFVYATAKADGCDKVHWLTHETNATAIQLYERIAERPGLIQFRKAL	TTGACCGATGTCCGGATTCGCGTCGTTACTGTCAACGACCATAAAGCCTGGCTGCCGCTATGGCAGGCCTATCTGCGCTTCTACAATACCGAGCTGGCCGAAGGCGTCAGCGACGTCACCTGGCAACGCCTTGTGGATTCGCACGAGCCGACCCACTCGGCGCTGGCCTGGCTGGATGGCGAAGCGGTGGGCATGGTGAACTTCATCTACCATCGCTCCAACTGGAGCATCAACAATGCCTGTTACCTGCAGGACCTGATTGTCGCGCCCGAACAACGCGGAACAGGCATTGGCAGGCAGCTGATCGAGTTTGTTTACGCCACGGCCAAGGCAGACGGTTGCGACAAGGTGCATTGGCTGACCCACGAAACCAACGCCACGGCCATTCAGTTGTACGAA…
pfam13420	Tx	PSPPH_5141	223	+			MSDTLLDWQAAALPTTNTLTGRFIRLEKLDATRHADDLWAALQGPNADPKLWDYLPYGPFIERSAFDAWLSGHQVASDPWFYTVVDQQTGKAEGVISLMSIVAAHGRIEIGHVTFSAAMQRTPKGTEAIYLLAREAFTLGYRRLEWKCNANNARSKRAAQRFGFSYEGAFRQHMVVKGQSRDTAWYSILDSEWPELQKAFECWLAVDNFADGQQIKGLEAFR	ATGTCCGACACTCTGCTGGACTGGCAAGCCGCTGCATTGCCCACAACCAACACACTGACAGGCCGTTTCATTCGCCTGGAAAAACTCGATGCCACACGTCACGCCGATGACTTGTGGGCTGCGCTTCAGGGCCCGAATGCCGACCCGAAACTGTGGGATTACCTCCCTTACGGGCCTTTTATCGAGCGCAGTGCCTTTGATGCATGGCTGTCCGGGCATCAGGTCGCGTCCGACCCATGGTTTTATACGGTCGTCGATCAGCAGACCGGTAAAGCCGAAGGTGTCATCAGCCTGATGTCGATCGTCGCCGCCCACGGGCGTATCGAAATAGGTCATGTCACTTTCAGCGCGGCCATGCAACGAACCCCCAAAGGCACCGAAGCCATTTACCTGCTGGCC…
YoeB	Ant	PSPPH_B0015	93	+	-29	TAFinder/TADB	MQILSFSQARAGLKQAMDDVCRDHEPAVITRQRGNPVVILSLDDYNSMAETMYLLGTENNATRLRRSIAKHKAGQASVKEIYLHVPEAETTE	ATGCAAATTTTATCATTCAGCCAGGCTCGTGCCGGTTTGAAGCAAGCTATGGACGATGTATGTCGGGATCATGAACCCGCCGTTATCACCCGACAGCGTGGTAACCCTGTTGTTATCCTTTCGCTGGATGACTACAACTCGATGGCTGAGACGATGTACCTGCTAGGTACGGAGAACAATGCCACTCGACTGCGCCGCTCCATTGCAAAGCACAAAGCCGGGCAAGCCTCCGTTAAGGAGATTTACCTACATGTCCCAGAAGCAGAAACAACAGAATAA
YoeB	Tx	PSPPH_B0016	101	+			MSQKQKQQNKQAARTSVKVAFIDDAWHDYQHWKTSDSDISVSIDSLIAEVMRTPFTGTGKPEALKGDLSGYWSRRINKEHRLVYFYEGGTLTIISCRFHY	ATGTCCCAGAAGCAGAAACAACAGAATAAACAAGCTGCACGCACATCCGTAAAAGTCGCCTTCATCGATGATGCCTGGCATGACTATCAGCACTGGAAAACCAGCGATTCCGATATCAGCGTATCTATCGATAGCCTGATTGCTGAAGTTATGCGTACTCCGTTCACCGGTACAGGCAAGCCAGAAGCGTTGAAGGGCGATCTGTCTGGCTACTGGTCCCGCCGAATCAACAAAGAGCACCGCCTTGTGTACTTCTACGAGGGAGGCACGCTCACCATTATCTCTTGTCGCTTCCATTACTAG
