# Supplementary material for: Genome Mining Shows Ubiquitous Presence and Extensive Diversity of Toxin-Antitoxin Systems in Pseudomonas syringae
Source: Front Microbiol. 2022 Jan 12;12:815911. doi: 10.3389/fmicb.2021.815911 (PMC8790059; doi:10.3389/fmicb.2021.815911)
Supplement: Supplementary Table 3 — Data on transcriptomics study analyzed for TA systems in this study. [file Table_3.XLSX]

## Sheet: B728a
	B728A
TA system			PasTI (1H)	PasTI (1H)	RES (2H)	RES (2H)	VapBC-1 (3H)	VapBC-1 (3H)	ParDE-1 (4H)	ParDE-1 (4H)	HipA_C (5H)	HipA_C (5H)	Bro-N (7H)	Bro-N (7H)	VapBC-2 (9H)	VapBC-2 (9H)	PemK (10H)	PemK (10H)	HD (15H)	HD (15H)	Zeta (20H)	Zeta (20H)	ParDE-2 (32H)	ParDE-2 (32H)	FIC (45H)	FIC (45H)	PsyrTA	PsyrTA	hypothetical	hypothetical	YhaK	YhaK	HcaE	HcaE	YncA	YncA	AraJ	AraJ	RimL	RimL (GNAT)
partner			Ant	Tx	Ant	Tx	Ant	Tx	Ant	Tx	Ant	Tx	Ant	Tx	Ant	Tx	Ant	Tx	Ant	Tx	Ant	Tx	Ant	Tx	Ant	Tx	Ant	Tx	Ant	Tx	Ant	Tx	Ant	Tx	Ant	Tx	Ant	Tx	Ant	Tx
gene_label			Psyr_4200	Psyr_4201	Psyr_0885	Psyr_0884	Psyr_3417	Psyr_3418	Psyr_4645	Psyr_4644	Psyr_2925	Psyr_2924	un-annotated	Psyr_3726	Psyr_0895	Psyr_0894	Psyr_0889	Psyr_8890	un-annotated	Psyr_2245	PSYR_RS06015	Psyr_1160	Psyr_3832	Psyr_3833	PSYR_RS19235	Psyr_3720	Psyr_3805	Psyr_3804	Psyr_1596	Psyr_1597	Psyr_1626	Psyr_1627	Psyr_2707	Psyr_2708	Psyr_3154	Psyr_3155	Psyr_4051	Psyr_4052	Psyr_5058	Psyr_5059
	Hockett et al., 2013	heat			0.533		0.441	0.508							2.264	0.363		0.369		0.326			0.545	0.591															0.576	0.541
	Yu et al., 2013 (microarray)	H2O2					1.944	2.01										0.7575											1.274						0.6335	1	1.466	1.779	1.514
		Apoplast				1.218	0.6209			1.41	1.343	3.527		0.6974	2.931	1.2		0.3951		0.5864			0.8238			0.5339		1.947	0.643	0.579		0.596			0.576	0.5752			0.7858	0.7571
		Ephiphytic	0.8197	0.8024	0.6934	0.7071	0.9104		0.6248	1.408	1.366	2.207			2.217	1.138	1.92	0.3111		0.3998		0.5947	0.7994			0.7488	0.8408	1.322	0.6856	0.6987	0.7545	0.3735			0.5477	0.558	1.207	1.479	1.224
		Low_Fe					1.755	1.897						0.7597	2.26			0.7528											1.357				0.5659	0.5313					1.302
		Low_N	2.297	1.964			4.482	5.356	1.325	1.681	1.489	0.7437		0.7456	10.71	1.271	5.799	0.6412		0.6706		0.1455	1.191	1.533		1.241	0.6213	1.729	1.624	0.8752		0.4854	0.3584	0.3838	0.36	0.3282	2.473	3.755	2.07	1.384
		Low_NaCl			1.165	1.451	0.7217	0.6451		1.73	1.299	1.927			0.6863	1.315		0.5841		0.7152		0.6816	0.7834	0.582		0.6084				0.8458				1.829	1.286	1.343	1.889	1.83	0.8383	0.7282
	Liu et al., 2020	pppGpp in MM	Non of the toxin antitoxin gene were found to be differentially induce or reduce in the mutant
	Liuet al., 2020	List of homologues and unique genes via comparative analysis of PstDC3000 and PssB728a genomes										-0.617317					0.715997					-0.216922	0.446094			-0.116673	-1.1538	-1.05711
	Greenwald et al., 2021	Non of Toxi-Antitoxin were diffretially induced in this study
																		PSYR_RS06015
																		PSYR_RS19235

## Sheet: 1448A
1448A
TA system		PasTI (1H)	PasTI (1H)	RES (2H)	RES (2H)	VapBC (3H)	VapBC (3H)	ParDE (4H)	ParDE (4H)	ParDE (11H)	ParDE (11H)	ParDE (12H)	ParDE (12H)	VapBC (16H)	VapBC (16H)	Gp49 (18H)	Gp49 (18H)	ParDE-4 (19H)	ParDE-4 (19H)	VapBC-3 (22H)	VapBC-3 (22H)	VapBC_3 (26H)	VapBC_3 (26H)	Gp49 (28H)	Gp49 (28H)	PasTI-2 (29H)	PasTI-2 (29H)	PemK (33H)	PemK (33H)	ParDE-5 (38H)	ParDE-5 (38H)	ParDE-6 (38H)	ParDE-6 (38H)	HD (67H)	HD (67H)	YafQ (70H)	YafQ (70H)	ParDE-7 (73H)	ParDE-7 (73H)	HipA-like	HipA-like	Cog3832	Cog3832	HigBA	HigBA	Pfam11723	Pfam11723	pfam12568	pfam12568
partner		Ant	Tx	Ant	Tx	Ant	Tx	Ant	Tx	Ant	Tx	Ant	Tx	Ant	Tx	Ant	Tx	Ant	Tx	Ant	Tx	Ant	Tx	Ant	Tx	Ant	Tx	Ant	Tx	Ant	Tx	Ant	Tx	Ant	Tx	Ant	Tx	Ant	Tx	Ant	Tx	Ant	Tx	Ant	Tx	Ant	Tx	Ant	Tx
gene_lable		PSPPH_4211	PSPPH_4212	PSPPH_0922	PSPPH_0921	PSPPH_3342	PSPPH_3343	PSPPH_A0094	PSPPH_A0095	PSPPH_1760	PSPPH_1759	PSPPH_0159	PSPPH_0160	PSPPH_A0137	PSPPH_A0136	PSPPH_B0005	PSPPH_B0006	PSPPH_1543	PSPPH_1542	PSPPH_A0035	PSPPH_A0034	PSPPH_A0051	PSPPH_A0052	PSPPH_A0021	PSPPH_RS26575	unannotated	PSPPH_5091	PSPPH_RS27115	PSPPH_A0142	PSPPH_A0004	PSPPH_A0005	PSPPH_A0070	PSPPH_A0071	unannotated	PSPPH_0892	PSPPH_B0056	PSPPH_B0055	PSPPH_A0102	PSPPH_A0103	PSPPH_4692	PSPPH_4693	PSPPH_1735	PSPPH_1734	PSPPH_0159	PSPPH_0158	PSPPH_2476	PSPPH_2475	PSPPH_4056	PSPPH_4057
Hua et al., 2020	diffrential gene of ∆lon strain in KB Log2 fold change				-1.42931										-1.47389									1.38954					-1.67288									-1.24209
Shao et al., 2021 MM	OmpR_ompR			-1.51673																																											0.502272
Differentially expressed genes identified in multiple mutants by RNA-seq analysis in MM	phoP_phoQ																																														1.03462
	PilR_pilS																																														0.504118
	psrA			-1.78873
	rhpR_rhpS																																														-0.771637
	vfr																																														0.670509
Shao et al., 2021 KB	algU			-1.48393																																											0.919708
Differentially expressed genes identified in multiple mutants by RNA-seq analysis in KB	gacA			-1.65972	-1.64187
	OmpR_ompR			0.943986	1.80127																																										-1.19223
	PhoP_phoQ
	PilR_pilR			1.4945	2.11964																																										-1.02718
	PilR_pilS			1.63614	1.60942
	PsrA			-0.838335
	RhpR_rhpS			1.18525																																											-1.31978
	RpoN																																														0.525697
	vfr			-1.02355																																											-0.643247
[truncated: 6 more columns]

## Sheet: DC3000
DC3000
	TA system	PasTI (1H)	PasTI (1H)	RES (2H)	RES (2H)	VapBC-1 (3H)	VapBC-1 (3H)	ParDE-1 (4H)	ParDE-1 (4H)	HipA_C (6H)	HipA_C (6H)	Bro-N (7H)	Bro-N (7H)	HigB-like (8H)	HigB-like (8H)	VapBC-2 (9H)	VapBC-2 (9H)	ParDE-2 (11H)	ParDE-2 (11H)	ParDE-3 (12H)	ParDE-3 (12H)	HigB-like (14H)	HigB-like (14H)	HD (15H)	HD (15H)	VapBC-3 (16H)	VapBC-3 (16H)	VapBC-4 (22H)	VapBC-4 (22H)	NTP_transf_2 (23H)	NTP_transf_2 (23H)	VapBC_3 (26H)	VapBC_3 (26H)	Gp49 (28H)	Gp49 (28H)	BroN (39H)	BroN (39H)	YoeB	YoeB	RelE-like2	RelE-like2	Cog2442	Cog2442	HigBA	HigBA	GNAT	GNAT	pfam11723	pfam11724
	partner	Ant	Tx	Ant	Tx	Ant	Tx	Ant	Tx	Ant	Tx	Ant	Tx	Ant	Tx	Ant	Tx	Ant	Tx	Ant	Tx	Ant	Tx	Ant	Tx	Ant	Tx	Ant	Tx	Ant	Tx	Ant	Tx	Ant	Tx	Ant	Tx	Ant	Tx	Ant	Tx	Ant	Tx	Ant	Tx	Ant	Tx	Ant	Tx
	gene_label	_4512	_4513	_1038	_1037	_2000	_1999	_0240	_0241	_0521	_0522	_1651	_1652	_0214	_0213	_1046	_1045	_3676	_3677	_5388	_5387	_0422	_0423	Un-annotated	_2479	_B0019	_B0018	_B0072	_B0073	_3926	_3926	_1058	_1057	_B0026	_B0025	_3097	_3096	_0337	_0336	_0720	_0719	_0930	_0931	_5375	_5374	_2445	_2444	_2903	_2904
Liuet al., 2020	pppGpp mutants in hrp-inducing minimal medium (HMM) comParDEd to wild type mutant									1.2645	0.604406			0.916773	0.28808			0.956943	0.919704	-0.762287	-1.12355	-0.327981	-0.291541									0.229421	-0.177038					0.115281		0.298725	-0.319456	0.649083	-0.110671		0.319399		1.96213
Liu et al., 2020	List of homologues and unique genes via comparative analysis of PstDC3000 and PssB728a genomes		1.16			1.01		1.55	1.78	1.26		-1.02									-1.12																										1.96
Markel et al., 2016	AlgU-dependent differentiall regulated genes						1.16062		1.69064			-2.06457			1.67931																								1.06164
Lanet al. 2006	WT KB/WT MM
	hrpL MM/WT MM
	hrpRS MM/ WT MM
Lovelace2018	PTI 1 hpi VS. Naive 1 hpi											0.648141																														0.229967	0.385826
	PTI 3 hpi VS. Naive 3 hpi							0.497254	0.523515			0.589391						0.596319	0.458852	0.440352					0.769271	0.389835								0.638595	0.606387			0.317177								0.338494
PTI- Pattern triggere induced A. thaliane	PTI 5 hpi VS. Naive 5 hpi	-0.411317	-0.547122			0.479091		1.02687	0.780569	-0.869291	-0.383107	0.986701										-0.389195	-0.477149		1.10458	0.492561								0.982969	0.960007			0.303981					0.45867						0.608327
NAive- Uninduced A. thaliana	Naive 1 hpi VS. inoculum	0.241845	0.464324	-0.80363	-0.714201				0.401777	0.720149		0.444626		0.738538		-0.623959	-0.559854			-0.582417	-0.918491	-0.334761			-1.09618				0.51549				0.414958	-0.659584	-1.17437				-0.375989	-0.544308				-0.913584	-0.952138				0.799396
	Naive 3 hpi VS. inoculum	0.302564	0.52639	-1.41639	-1.5361	-0.271508				-0.636043	-0.253571	0.509326		0.730178	0.41276	-0.693423	-0.431559			-0.573344	-0.737374				-1.65581	0.279316		-0.00904358	0.470354			0.348558	0.47759	-0.681551	-1.24361		0.676427		-0.416518	-0.471675	-0.563325			-0.825325	-0.83609	-0.449991	-0.271508		0.556461
	Naive 5 hpi VS. inoculum	0.372582	0.544226	-1.19303	-1.31866	-0.609012		-0.939842		1.32137				0.874031	0.397035	-0.59767				-0.279906	-0.495911				-1.93104				0.673336			0.579793	0.804718	-1.08758	-1.6371			-0.285443	-0.402638	-0.446943		0.292133		-0.773618	-0.93392	-0.383104	0.559013
	PTI 3 hpi VS. inoculum	0.348045	0.406335	-0.881704	-0.877873				0.383344	0.687828		1.09277		0.738563		-0.434839				-0.421134	-0.759333	-0.355548			-1.2992	0.311225			0.627105			0.358416	0.591964	-0.713825	-1.30022				-0.341236	-0.490016	-0.490043	0.341081	0.55136	-0.819795	-0.994586		0.363144		0.486624
	PTI 1 hpi VS. inoculum			-1.27942	-1.32117				0.526705	0.538172	-0.282728	1.09872		0.801621	0.509748	-0.510567	-0.400262	0.598872	0.646328		-0.54435				-0.886536	0.669151	0.471325		0.549437			0.519913	0.427457		-0.637225				-0.476034	-0.442505			0.266408	-0.619125	-0.822575		0.326341	0.510371	0.951925
	PTI 5 hpi VS. inoculum			-1.07272	-1.15892				0.579802	0.452083	-0.378992	1.18521		0.723712		-0.656624	-0.506247				-0.61922	-0.302247			-0.826458	0.702118			0.584893			0.792724	0.723994		-0.677092				-0.417392	-0.456591	-0.477634		0.43062	-0.876512	-0.869667		0.352687		0.880148
	Naive 1 hpi VS. Naive 3 hpi			-0.612765	-0.821899			-0.457969	-0.398587						0.312525								0.369507														0.529533
	Naive 1 hpi VS. Naive 5 hpi				-0.604463			-0.761768	-0.602544	0.601225					0.2968					0.302511	0.42258	0.421708	0.456992		-0.834864							0.331348	0.38976	-0.427998	-0.462731												0.339288		-0.527575
	Naive 3 hpi VS. Naive 5 hpi									0.495545	0.257686									0.293438													0.327127	-0.406031							0.446612
	PTI 1 hpi vs. PTI 3 hpi				-0.443298										0.36433					0.288143						0.357926								0.670869	0.662998								-0.284952						0.4653
	PTI 1 hpi vs. PTI 5 hpi	-0.38678	-0.409231																							0.390893						0.434308		0.609211	0.623131							-0.247934
	PTI 3 hpi vs. PTI 5 hpi														-0.325357								-0.345892									0.272812	0.296537
Bronstein et al. 2008	a/c+ decrease in fold change after 4h. Iron citrate			-0.625046																														-0.777345	-0.648474														-1.32783
	c-/c+ decrease due to iro citarte comParDEd to sodium citrate at 4h.																																																-1.38317
	a/b+ decrase due to iron citrate after 30 minutes
	b+/c+ decrase due to ieron citrate at 4. comParDEd to 30 minute iron citrate																																	-0.629037
	a/c- decrease due sodium citrate at 4h.																	1.06503							-1.94628
Filiatrault et al., 2010	Non of the toxin-antitoxin gene were reported in this study								2.12			-5.16										2.08						2.12
Santamaría-Hernando et al., 2020	Non of the toxin-antitoxin gene were reported in this study
[truncated: 8 more columns]
